# Supplementary material for: Potential Role of Domains Rearranged Methyltransferase7 in Starch and Chlorophyll Metabolism to Regulate Leaf Senescence in Tomato
Source: Front Plant Sci. 2022 Feb 8;13:836015. doi: 10.3389/fpls.2022.836015 (PMC8860812; doi:10.3389/fpls.2022.836015)
Supplement: Supplementary file 5 [file Table_4.XLSX]

## Sheet: GO terms of 289 methDEGs 
Supplementary Table S4. GO terms of 289 meth-DEGs.
GO Term ID	GO Term	Level 1	Level 2	Term Candidate Gene Num	Total Candidate Gene Num	Term Gene Num	Total Gene Num	Rich Ratio	P value	Q value
GO:0008422	beta-glucosidase activity	molecular_function	catalytic activity	3	183	10	17591	0.3	0.000125949	0.023099
GO:0009523	photosystem II	cellular_component	cell	7	120	118	13066	0.059322	0.000105049	0.023099
GO:0015926	glucosidase activity	molecular_function	catalytic activity	4	183	18	17591	0.222222	3.09434e-05	0.023099
GO:0016717	oxidoreductase activity, acting on paired donors, with oxidation of a pair of donors resulting in the reduction of molecular oxygen to two molecules of water	molecular_function	catalytic activity	4	183	25	17591	0.16	0.00012084	0.023099
GO:0042973	glucan endo-1,3-beta-D-glucosidase activity	molecular_function	catalytic activity	3	183	8	17591	0.375	5.96864e-05	0.023099
GO:0009521	photosystem	cellular_component	cell	8	120	191	13066	0.0418848	0.000374743	0.0572732
GO:0006869	lipid transport	biological_process	localization	5	95	83	9817	0.060241	0.00122221	0.10378
GO:0015979	photosynthesis	biological_process	cellular process	10	95	314	9817	0.0318471	0.000883304	0.10378
GO:0019898	extrinsic component of membrane	cellular_component	membrane part	3	120	22	13066	0.136364	0.0010242	0.10378
GO:0034357	photosynthetic membrane	cellular_component	cell	11	120	392	13066	0.0280612	0.000956483	0.10378
GO:0044436	thylakoid part	cellular_component	cell	11	120	405	13066	0.0271605	0.0012449	0.10378
GO:0009654	photosystem II oxygen evolving complex	cellular_component	cell	3	120	27	13066	0.111111	0.00188138	0.115015
GO:0010876	lipid localization	biological_process	localization	5	95	88	9817	0.0568182	0.00158778	0.115015
GO:0016491	oxidoreductase activity	molecular_function	catalytic activity	35	183	2036	17591	0.0171906	0.00187455	0.115015
GO:0042651	thylakoid membrane	cellular_component	cell	10	120	362	13066	0.0276243	0.00183301	0.115015
GO:0009579	thylakoid	cellular_component	cell	11	120	445	13066	0.0247191	0.00261243	0.149725
GO:1990204	oxidoreductase complex	cellular_component	cell	4	120	68	13066	0.0588235	0.00350445	0.189034
GO:0016705	oxidoreductase activity, acting on paired donors, with incorporation or reduction of molecular oxygen	molecular_function	catalytic activity	10	183	350	17591	0.0285714	0.00371745	0.189383
GO:0005975	carbohydrate metabolic process	biological_process	metabolic process	17	95	873	9817	0.0194731	0.00393298	0.189818
GO:0005615	extracellular space	cellular_component	extracellular region	3	120	37	13066	0.0810811	0.00467557	0.214375
GO:0005372	water transmembrane transporter activity	molecular_function	transporter activity	2	183	11	17591	0.181818	0.00556558	0.231984
GO:0015250	water channel activity	molecular_function	transporter activity	2	183	11	17591	0.181818	0.00556558	0.231984
GO:0044425	membrane part	cellular_component	membrane part	80	120	7248	13066	0.0110375	0.00796278	0.317472
GO:0044421	extracellular region part	cellular_component	extracellular region	3	120	46	13066	0.0652174	0.00860493	0.32878
GO:0000578	embryonic axis specification	biological_process	multicellular organismal process	1	95	2	9817	0.5	0.0192615	0.365009
GO:0004185	serine-type carboxypeptidase activity	molecular_function	catalytic activity	3	183	54	17591	0.0555556	0.0186357	0.365009
GO:0004457	lactate dehydrogenase activity	molecular_function	catalytic activity	1	183	2	17591	0.5	0.0206985	0.365009
GO:0004459	L-lactate dehydrogenase activity	molecular_function	catalytic activity	1	183	2	17591	0.5	0.0206985	0.365009
GO:0004489	methylenetetrahydrofolate reductase (NAD(P)H) activity	molecular_function	catalytic activity	1	183	2	17591	0.5	0.0206985	0.365009
GO:0004558	alpha-1,4-glucosidase activity	molecular_function	catalytic activity	1	183	2	17591	0.5	0.0206985	0.365009
GO:0004822	isoleucine-tRNA ligase activity	molecular_function	catalytic activity	1	183	2	17591	0.5	0.0206985	0.365009
GO:0006428	isoleucyl-tRNA aminoacylation	biological_process	cellular process	1	95	2	9817	0.5	0.0192615	0.365009
GO:0008187	poly-pyrimidine tract binding	molecular_function	binding	1	183	2	17591	0.5	0.0206985	0.365009
GO:0008266	poly(U) RNA binding	molecular_function	binding	1	183	2	17591	0.5	0.0206985	0.365009
GO:0008762	UDP-N-acetylmuramate dehydrogenase activity	molecular_function	catalytic activity	1	183	2	17591	0.5	0.0206985	0.365009
GO:0009109	coenzyme catabolic process	biological_process	cellular process	1	95	2	9817	0.5	0.0192615	0.365009
GO:0009880	embryonic pattern specification	biological_process	multicellular organismal process	1	95	2	9817	0.5	0.0192615	0.365009
GO:0010087	phloem or xylem histogenesis	biological_process	developmental process	2	95	22	9817	0.0909091	0.0188751	0.365009
GO:0016020	membrane	cellular_component	membrane	82	120	7678	13066	0.0106799	0.019281	0.365009
GO:0018423	protein C-terminal leucine carboxyl O-methyltransferase activity	molecular_function	catalytic activity	1	183	2	17591	0.5	0.0206985	0.365009
GO:0031224	intrinsic component of membrane	cellular_component	membrane part	76	120	6987	13066	0.0108773	0.0180742	0.365009
GO:0031977	thylakoid lumen	cellular_component	cell	2	120	21	13066	0.0952381	0.0156738	0.365009
GO:0032450	maltose alpha-glucosidase activity	molecular_function	catalytic activity	1	183	2	17591	0.5	0.0206985	0.365009
GO:0035337	fatty-acyl-CoA metabolic process	biological_process	cellular process	1	95	2	9817	0.5	0.0192615	0.365009
GO:0036115	fatty-acyl-CoA catabolic process	biological_process	cellular process	1	95	2	9817	0.5	0.0192615	0.365009
GO:0046658	anchored component of plasma membrane	cellular_component	cell	2	120	24	13066	0.0833333	0.0202352	0.365009
GO:0048831	regulation of shoot system development	biological_process	biological regulation	3	95	47	9817	0.0638298	0.0104664	0.365009
GO:0051026	chiasma assembly	biological_process	cellular component organization or biogenesis	1	95	2	9817	0.5	0.0192615	0.365009
GO:0072659	protein localization to plasma membrane	biological_process	localization	1	95	2	9817	0.5	0.0192615	0.365009
GO:1901569	fatty acid derivative catabolic process	biological_process	metabolic process	1	95	2	9817	0.5	0.0192615	0.365009
GO:1902347	response to strigolactone	biological_process	response to stimulus	1	95	2	9817	0.5	0.0192615	0.365009
GO:1990778	protein localization to cell periphery	biological_process	localization	1	95	2	9817	0.5	0.0192615	0.365009
GO:0008168	methyltransferase activity	molecular_function	catalytic activity	9	183	396	17591	0.0227273	0.0230308	0.398476
GO:0000179	rRNA (adenine-N6,N6-)-dimethyltransferase activity	molecular_function	catalytic activity	1	183	3	17591	0.333333	0.0308873	0.412859
GO:0003824	catalytic activity	molecular_function	catalytic activity	123	183	10642	17591	0.011558	0.0354553	0.412859
GO:0003844	1,4-alpha-glucan branching enzyme activity	molecular_function	catalytic activity	1	183	3	17591	0.333333	0.0308873	0.412859
GO:0003880	protein C-terminal carboxyl O-methyltransferase activity	molecular_function	catalytic activity	1	183	3	17591	0.333333	0.0308873	0.412859
GO:0003995	acyl-CoA dehydrogenase activity	molecular_function	catalytic activity	1	183	4	17591	0.25	0.0409708	0.412859
GO:0004180	carboxypeptidase activity	molecular_function	catalytic activity	3	183	68	17591	0.0441176	0.0339077	0.412859
GO:0004324	ferredoxin-NADP+ reductase activity	molecular_function	catalytic activity	1	183	3	17591	0.333333	0.0308873	0.412859
GO:0004353	glutamate dehydrogenase [NAD(P)+] activity	molecular_function	catalytic activity	1	183	3	17591	0.333333	0.0308873	0.412859
GO:0004367	glycerol-3-phosphate dehydrogenase [NAD+] activity	molecular_function	catalytic activity	1	183	4	17591	0.25	0.0409708	0.412859
GO:0004553	hydrolase activity, hydrolyzing O-glycosyl compounds	molecular_function	catalytic activity	9	183	405	17591	0.0222222	0.0261269	0.412859
GO:0006195	purine nucleotide catabolic process	biological_process	cellular process	1	95	4	9817	0.25	0.0381558	0.412859
GO:0006538	glutamate catabolic process	biological_process	cellular process	1	95	4	9817	0.25	0.0381558	0.412859
GO:0006952	defense response	biological_process	response to stimulus	6	95	260	9817	0.0230769	0.0400488	0.412859
GO:0007155	cell adhesion	biological_process	biological adhesion	1	95	4	9817	0.25	0.0381558	0.412859
GO:0008253	5'-nucleotidase activity	molecular_function	catalytic activity	1	183	4	17591	0.25	0.0409708	0.412859
GO:0008429	phosphatidylethanolamine binding	molecular_function	binding	1	183	4	17591	0.25	0.0409708	0.412859
GO:0009064	glutamine family amino acid metabolic process	biological_process	cellular process	3	95	74	9817	0.0405405	0.0347421	0.412859
GO:0009154	purine ribonucleotide catabolic process	biological_process	cellular process	1	95	4	9817	0.25	0.0381558	0.412859
GO:0009261	ribonucleotide catabolic process	biological_process	cellular process	1	95	4	9817	0.25	0.0381558	0.412859
GO:0009535	chloroplast thylakoid membrane	cellular_component	organelle part	7	120	337	13066	0.0207715	0.0357272	0.412859
GO:0009815	1-aminocyclopropane-1-carboxylate oxidase activity	molecular_function	catalytic activity	1	183	4	17591	0.25	0.0409708	0.412859
GO:0009909	regulation of flower development	biological_process	biological regulation	2	95	33	9817	0.0606061	0.0402898	0.412859
GO:0010340	carboxyl-O-methyltransferase activity	molecular_function	catalytic activity	1	183	4	17591	0.25	0.0409708	0.412859
GO:0016021	integral component of membrane	cellular_component	membrane part	74	120	6967	13066	0.0106215	0.0395776	0.412859
GO:0016433	rRNA (adenine) methyltransferase activity	molecular_function	catalytic activity	1	183	3	17591	0.333333	0.0308873	0.412859
GO:0016638	oxidoreductase activity, acting on the CH-NH2 group of donors	molecular_function	catalytic activity	2	183	26	17591	0.0769231	0.029702	0.412859
GO:0016731	oxidoreductase activity, acting on iron-sulfur proteins as donors, NAD or NADP as acceptor	molecular_function	catalytic activity	1	183	3	17591	0.333333	0.0308873	0.412859
GO:0016741	transferase activity, transferring one-carbon groups	molecular_function	catalytic activity	9	183	411	17591	0.0218978	0.0283484	0.412859
GO:0016798	hydrolase activity, acting on glycosyl bonds	molecular_function	catalytic activity	9	183	432	17591	0.0208333	0.0371682	0.412859
GO:0022610	biological adhesion	biological_process	biological adhesion	1	95	4	9817	0.25	0.0381558	0.412859
GO:0033869	nucleoside bisphosphate catabolic process	biological_process	cellular process	1	95	4	9817	0.25	0.0381558	0.412859
GO:0034031	ribonucleoside bisphosphate catabolic process	biological_process	cellular process	1	95	4	9817	0.25	0.0381558	0.412859
GO:0034034	purine nucleoside bisphosphate catabolic process	biological_process	cellular process	1	95	4	9817	0.25	0.0381558	0.412859
GO:0043649	dicarboxylic acid catabolic process	biological_process	cellular process	1	95	4	9817	0.25	0.0381558	0.412859
GO:0046168	glycerol-3-phosphate catabolic process	biological_process	cellular process	1	95	4	9817	0.25	0.0381558	0.412859
GO:0051998	protein carboxyl O-methyltransferase activity	molecular_function	catalytic activity	1	183	4	17591	0.25	0.0409708	0.412859
GO:0055035	plastid thylakoid membrane	cellular_component	organelle part	7	120	338	13066	0.0207101	0.0362148	0.412859
GO:0070008	serine-type exopeptidase activity	molecular_function	catalytic activity	3	183	60	17591	0.05	0.0245788	0.412859
GO:0022414	reproductive process	biological_process	reproductive process	8	95	405	9817	0.0197531	0.0420619	0.419247
GO:0000003	reproduction	biological_process	reproduction	8	95	408	9817	0.0196078	0.0436155	0.430059
GO:0009331	glycerol-3-phosphate dehydrogenase complex	cellular_component	cell	1	120	5	13066	0.2	0.0450917	0.435254
GO:0050661	NADP binding	molecular_function	binding	3	183	76	17591	0.0394737	0.0448162	0.435254
GO:0006520	cellular amino acid metabolic process	biological_process	cellular process	7	95	342	9817	0.0204678	0.0475848	0.445257
GO:0007129	synapsis	biological_process	cellular component organization or biogenesis	1	95	5	9817	0.2	0.0474675	0.445257
GO:0045143	homologous chromosome segregation	biological_process	cellular component organization or biogenesis	1	95	5	9817	0.2	0.0474675	0.445257
GO:0004351	glutamate decarboxylase activity	molecular_function	catalytic activity	1	183	5	17591	0.2	0.0509499	0.464804
GO:0009534	chloroplast thylakoid	cellular_component	organelle part	7	120	366	13066	0.0191257	0.0517012	0.464804
GO:0031976	plastid thylakoid	cellular_component	organelle part	7	120	366	13066	0.0191257	0.0517012	0.464804
GO:0050662	coenzyme binding	molecular_function	binding	10	183	530	17591	0.0188679	0.0507796	0.464804
GO:0006072	glycerol-3-phosphate metabolic process	biological_process	cellular process	1	95	6	9817	0.166667	0.0566899	0.468887
GO:0008289	lipid binding	molecular_function	binding	5	183	196	17591	0.0255102	0.0542534	0.468887
GO:0010411	xyloglucan metabolic process	biological_process	cellular process	2	95	39	9817	0.0512821	0.0544851	0.468887
GO:0015267	channel activity	molecular_function	transporter activity	4	183	138	17591	0.0289855	0.0561412	0.468887
GO:0016762	xyloglucan:xyloglucosyl transferase activity	molecular_function	catalytic activity	2	183	37	17591	0.0540541	0.0565318	0.468887
GO:0022803	passive transmembrane transporter activity	molecular_function	transporter activity	4	183	138	17591	0.0289855	0.0561412	0.468887
GO:0031225	anchored component of membrane	cellular_component	membrane part	2	120	42	13066	0.047619	0.0567573	0.468887
GO:0052646	alditol phosphate metabolic process	biological_process	cellular process	1	95	6	9817	0.166667	0.0566899	0.468887
GO:0071695	anatomical structure maturation	biological_process	developmental process	2	95	39	9817	0.0512821	0.0544851	0.468887
GO:0000911	cytokinesis by cell plate formation	biological_process	cellular process	1	95	10	9817	0.1	0.0927044	0.480282
GO:0003727	single-stranded RNA binding	molecular_function	binding	1	183	7	17591	0.142857	0.0705993	0.480282
GO:0004084	branched-chain-amino-acid transaminase activity	molecular_function	catalytic activity	1	183	9	17591	0.111111	0.0898441	0.480282
GO:0004564	beta-fructofuranosidase activity	molecular_function	catalytic activity	1	183	9	17591	0.111111	0.0898441	0.480282
GO:0005086	ARF guanyl-nucleotide exchange factor activity	molecular_function	molecular function regulator	1	183	9	17591	0.111111	0.0898441	0.480282
GO:0005576	extracellular region	cellular_component	extracellular region	8	120	481	13066	0.016632	0.0752159	0.480282
GO:0005977	glycogen metabolic process	biological_process	cellular process	1	95	9	9817	0.111111	0.0838304	0.480282
GO:0005978	glycogen biosynthetic process	biological_process	cellular process	1	95	9	9817	0.111111	0.0838304	0.480282
GO:0006112	energy reserve metabolic process	biological_process	cellular process	1	95	9	9817	0.111111	0.0838304	0.480282
GO:0006305	DNA alkylation	biological_process	cellular process	1	95	10	9817	0.1	0.0927044	0.480282
GO:0006306	DNA methylation	biological_process	cellular process	1	95	10	9817	0.1	0.0927044	0.480282
GO:0006536	glutamate metabolic process	biological_process	cellular process	1	95	8	9817	0.125	0.0748706	0.480282
GO:0006541	glutamine metabolic process	biological_process	cellular process	2	95	46	9817	0.0434783	0.0728969	0.480282
GO:0008171	O-methyltransferase activity	molecular_function	catalytic activity	2	183	48	17591	0.0416667	0.0889937	0.480282
GO:0008173	RNA methyltransferase activity	molecular_function	catalytic activity	2	183	46	17591	0.0434783	0.0827452	0.480282
GO:0008238	exopeptidase activity	molecular_function	catalytic activity	3	183	103	17591	0.0291262	0.0924141	0.480282
GO:0009065	glutamine family amino acid catabolic process	biological_process	cellular process	1	95	9	9817	0.111111	0.0838304	0.480282
GO:0009648	photoperiodism	biological_process	response to stimulus	1	95	8	9817	0.125	0.0748706	0.480282
GO:0009692	ethylene metabolic process	biological_process	biological regulation	1	95	8	9817	0.125	0.0748706	0.480282
GO:0009693	ethylene biosynthetic process	biological_process	biological regulation	1	95	8	9817	0.125	0.0748706	0.480282
GO:0010054	trichoblast differentiation	biological_process	cellular process	1	95	10	9817	0.1	0.0927044	0.480282
GO:0010089	xylem development	biological_process	developmental process	1	95	8	9817	0.125	0.0748706	0.480282
GO:0010101	post-embryonic root morphogenesis	biological_process	multicellular organismal process	1	95	8	9817	0.125	0.0748706	0.480282
GO:0010102	lateral root morphogenesis	biological_process	multicellular organismal process	1	95	8	9817	0.125	0.0748706	0.480282
GO:0010112	regulation of systemic acquired resistance	biological_process	biological regulation	1	95	9	9817	0.111111	0.0838304	0.480282
GO:0010154	fruit development	biological_process	multicellular organismal process	3	95	110	9817	0.0272727	0.0906011	0.480282
GO:0010311	lateral root formation	biological_process	multicellular organismal process	1	95	8	9817	0.125	0.0748706	0.480282
GO:0010817	regulation of hormone levels	biological_process	biological regulation	3	95	101	9817	0.029703	0.0743342	0.480282
GO:0016639	oxidoreductase activity, acting on the CH-NH2 group of donors, NAD or NADP as acceptor	molecular_function	catalytic activity	1	183	8	17591	0.125	0.0802718	0.480282
GO:0016730	oxidoreductase activity, acting on iron-sulfur proteins as donors	molecular_function	catalytic activity	1	183	7	17591	0.142857	0.0705993	0.480282
GO:0019684	photosynthesis, light reaction	biological_process	cellular process	4	95	173	9817	0.0231214	0.08667	0.480282
GO:0021700	developmental maturation	biological_process	developmental process	2	95	41	9817	0.0487805	0.0595556	0.480282
GO:0022838	substrate-specific channel activity	molecular_function	transporter activity	3	183	99	17591	0.030303	0.0843953	0.480282
GO:0031226	intrinsic component of plasma membrane	cellular_component	cell	2	120	49	13066	0.0408163	0.0744109	0.480282
GO:0032012	regulation of ARF protein signal transduction	biological_process	biological regulation	1	95	9	9817	0.111111	0.0838304	0.480282
GO:0032506	cytokinetic process	biological_process	cellular process	1	95	10	9817	0.1	0.0927044	0.480282
GO:0032509	endosome transport via multivesicular body sorting pathway	biological_process	localization	1	95	7	9817	0.142857	0.065824	0.480282
GO:0033612	receptor serine/threonine kinase binding	molecular_function	binding	1	183	7	17591	0.142857	0.0705993	0.480282
GO:0035999	tetrahydrofolate interconversion	biological_process	cellular process	1	95	10	9817	0.1	0.0927044	0.480282
GO:0042803	protein homodimerization activity	molecular_function	binding	2	183	44	17591	0.0454545	0.0766402	0.480282
GO:0043449	cellular alkene metabolic process	biological_process	cellular process	1	95	8	9817	0.125	0.0748706	0.480282
GO:0043450	alkene biosynthetic process	biological_process	cellular process	1	95	8	9817	0.125	0.0748706	0.480282
GO:0044210	'de novo' CTP biosynthetic process	biological_process	cellular process	1	95	10	9817	0.1	0.0927044	0.480282
GO:0045132	meiotic chromosome segregation	biological_process	cellular component organization or biogenesis	1	95	8	9817	0.125	0.0748706	0.480282
GO:0045156	electron transporter, transferring electrons within the cyclic electron transport pathway of photosynthesis activity	molecular_function	catalytic activity	2	183	46	17591	0.0434783	0.0827452	0.480282
GO:0046578	regulation of Ras protein signal transduction	biological_process	biological regulation	1	95	9	9817	0.111111	0.0838304	0.480282
GO:0048469	cell maturation	biological_process	cellular process	1	95	10	9817	0.1	0.0927044	0.480282
GO:0048527	lateral root development	biological_process	multicellular organismal process	1	95	10	9817	0.1	0.0927044	0.480282
GO:0048528	post-embryonic root development	biological_process	multicellular organismal process	1	95	10	9817	0.1	0.0927044	0.480282
GO:0048573	photoperiodism, flowering	biological_process	multicellular organismal process	1	95	8	9817	0.125	0.0748706	0.480282
GO:0048764	trichoblast maturation	biological_process	cellular process	1	95	10	9817	0.1	0.0927044	0.480282
GO:0048765	root hair cell differentiation	biological_process	cellular process	1	95	10	9817	0.1	0.0927044	0.480282
GO:0051056	regulation of small GTPase mediated signal transduction	biological_process	biological regulation	1	95	9	9817	0.111111	0.0838304	0.480282
GO:0051239	regulation of multicellular organismal process	biological_process	biological regulation	3	95	101	9817	0.029703	0.0743342	0.480282
GO:0051704	multi-organism process	biological_process	multi-organism process	6	95	319	9817	0.0188088	0.0885612	0.480282
GO:0052654	L-leucine transaminase activity	molecular_function	catalytic activity	1	183	8	17591	0.125	0.0802718	0.480282
GO:0052655	L-valine transaminase activity	molecular_function	catalytic activity	1	183	8	17591	0.125	0.0802718	0.480282
GO:0052656	L-isoleucine transaminase activity	molecular_function	catalytic activity	1	183	8	17591	0.125	0.0802718	0.480282
GO:0070192	chromosome organization involved in meiotic cell cycle	biological_process	cellular component organization or biogenesis	1	95	9	9817	0.111111	0.0838304	0.480282
GO:0071985	multivesicular body sorting pathway	biological_process	localization	1	95	8	9817	0.125	0.0748706	0.480282
GO:0090599	alpha-glucosidase activity	molecular_function	catalytic activity	1	183	6	17591	0.166667	0.0608257	0.480282
GO:1900673	olefin metabolic process	biological_process	metabolic process	1	95	8	9817	0.125	0.0748706	0.480282
GO:1900674	olefin biosynthetic process	biological_process	metabolic process	1	95	8	9817	0.125	0.0748706	0.480282
GO:1901136	carbohydrate derivative catabolic process	biological_process	metabolic process	2	95	42	9817	0.047619	0.0621498	0.480282
GO:1902410	mitotic cytokinetic process	biological_process	cellular process	1	95	10	9817	0.1	0.0927044	0.480282
GO:2000026	regulation of multicellular organismal development	biological_process	biological regulation	3	95	93	9817	0.0322581	0.0611027	0.480282
GO:2000241	regulation of reproductive process	biological_process	biological regulation	2	95	54	9817	0.037037	0.095979	0.494454
GO:0051287	NAD binding	molecular_function	binding	3	183	105	17591	0.0285714	0.0965378	0.494554
GO:0009607	response to biotic stimulus	biological_process	response to stimulus	4	95	181	9817	0.0220994	0.0982817	0.497924
GO:0098796	membrane protein complex	cellular_component	protein-containing complex	8	120	511	13066	0.0156556	0.0981537	0.497924
GO:0003883	CTP synthase activity	molecular_function	catalytic activity	1	183	10	17591	0.1	0.0993173	0.500406
GO:0006304	DNA modification	biological_process	cellular process	1	95	11	9817	0.0909091	0.101493	0.503078
GO:0008757	S-adenosylmethionine-dependent methyltransferase activity	molecular_function	catalytic activity	3	183	107	17591	0.0280374	0.100736	0.503078
GO:0044728	DNA methylation or demethylation	biological_process	cellular process	1	95	11	9817	0.0909091	0.101493	0.503078
GO:0000281	mitotic cytokinesis	biological_process	cellular process	1	95	13	9817	0.0769231	0.118819	0.512071
GO:0000977	RNA polymerase II regulatory region sequence-specific DNA binding	molecular_function	binding	2	183	53	17591	0.0377358	0.105188	0.512071
GO:0001012	RNA polymerase II regulatory region DNA binding	molecular_function	binding	2	183	53	17591	0.0377358	0.105188	0.512071
GO:0005315	inorganic phosphate transmembrane transporter activity	molecular_function	transporter activity	1	183	12	17591	0.0833333	0.117971	0.512071
GO:0005506	iron ion binding	molecular_function	binding	7	183	385	17591	0.0181818	0.107802	0.512071
GO:0006629	lipid metabolic process	biological_process	metabolic process	10	95	676	9817	0.0147929	0.117446	0.512071
GO:0006817	phosphate ion transport	biological_process	localization	1	95	13	9817	0.0769231	0.118819	0.512071
GO:0008252	nucleotidase activity	molecular_function	catalytic activity	1	183	12	17591	0.0833333	0.117971	0.512071
GO:0008483	transaminase activity	molecular_function	catalytic activity	2	183	57	17591	0.0350877	0.118666	0.512071
GO:0008649	rRNA methyltransferase activity	molecular_function	catalytic activity	1	183	12	17591	0.0833333	0.117971	0.512071
GO:0009527	plastid outer membrane	cellular_component	organelle part	1	120	13	13066	0.0769231	0.11308	0.512071
GO:0009707	chloroplast outer membrane	cellular_component	organelle part	1	120	13	13066	0.0769231	0.11308	0.512071
GO:0009798	axis specification	biological_process	multicellular organismal process	1	95	12	9817	0.0833333	0.110198	0.512071
GO:0009926	auxin polar transport	biological_process	biological regulation	1	95	13	9817	0.0769231	0.118819	0.512071
GO:0009941	chloroplast envelope	cellular_component	organelle part	4	120	204	13066	0.0196078	0.118424	0.512071
GO:0010053	root epidermal cell differentiation	biological_process	cellular process	1	95	12	9817	0.0833333	0.110198	0.512071
GO:0010207	photosystem II assembly	biological_process	cellular component organization or biogenesis	1	95	12	9817	0.0833333	0.110198	0.512071
GO:0016157	sucrose synthase activity	molecular_function	catalytic activity	1	183	12	17591	0.0833333	0.117971	0.512071
GO:0016769	transferase activity, transferring nitrogenous groups	molecular_function	catalytic activity	2	183	57	17591	0.0350877	0.118666	0.512071
GO:0016868	intramolecular transferase activity, phosphotransferases	molecular_function	catalytic activity	1	183	12	17591	0.0833333	0.117971	0.512071
GO:0030246	carbohydrate binding	molecular_function	binding	6	183	321	17591	0.0186916	0.118947	0.512071
GO:0046434	organophosphate catabolic process	biological_process	cellular process	2	95	59	9817	0.0338983	0.111323	0.512071
GO:0048046	apoplast	cellular_component	extracellular region	3	120	131	13066	0.0229008	0.119502	0.512071
GO:0048608	reproductive structure development	biological_process	multicellular organismal process	4	95	190	9817	0.0210526	0.112169	0.512071
GO:0050793	regulation of developmental process	biological_process	biological regulation	3	95	119	9817	0.0252101	0.108214	0.512071
GO:0061458	reproductive system development	biological_process	multicellular organismal process	4	95	190	9817	0.0210526	0.112169	0.512071
GO:0072523	purine-containing compound catabolic process	biological_process	cellular process	1	95	13	9817	0.0769231	0.118819	0.512071
GO:0090697	post-embryonic plant organ morphogenesis	biological_process	multicellular organismal process	1	95	12	9817	0.0833333	0.110198	0.512071
GO:0140102	catalytic activity, acting on a rRNA	molecular_function	catalytic activity	1	183	12	17591	0.0833333	0.117971	0.512071
GO:0032502	developmental process	biological_process	developmental process	8	95	511	9817	0.0156556	0.120987	0.513636
GO:0045944	positive regulation of transcription by RNA polymerase II	biological_process	biological regulation	2	95	62	9817	0.0322581	0.120818	0.513636
GO:0000910	cytokinesis	biological_process	cellular process	1	95	14	9817	0.0714286	0.127358	0.516247
GO:0000976	transcription regulatory region sequence-specific DNA binding	molecular_function	binding	2	183	62	17591	0.0322581	0.136072	0.516247
GO:0004144	diacylglycerol O-acyltransferase activity	molecular_function	catalytic activity	1	183	13	17591	0.0769231	0.127153	0.516247
GO:0004713	protein tyrosine kinase activity	molecular_function	catalytic activity	1	183	14	17591	0.0714286	0.13624	0.516247
GO:0004970	ionotropic glutamate receptor activity	molecular_function	transporter activity	1	183	14	17591	0.0714286	0.13624	0.516247
GO:0005230	extracellular ligand-gated ion channel activity	molecular_function	transporter activity	1	183	14	17591	0.0714286	0.13624	0.516247
GO:0006897	endocytosis	biological_process	localization	1	95	14	9817	0.0714286	0.127358	0.516247
GO:0008066	glutamate receptor activity	molecular_function	molecular transducer activity	1	183	14	17591	0.0714286	0.13624	0.516247
GO:0009526	plastid envelope	cellular_component	organelle part	4	120	210	13066	0.0190476	0.127849	0.516247
GO:0009627	systemic acquired resistance	biological_process	multi-organism process	1	95	15	9817	0.0666667	0.135815	0.516247
GO:0009767	photosynthetic electron transport chain	biological_process	cellular process	2	95	66	9817	0.030303	0.133775	0.516247
GO:0009914	hormone transport	biological_process	biological regulation	1	95	15	9817	0.0666667	0.135815	0.516247
GO:0010410	hemicellulose metabolic process	biological_process	cellular process	2	95	66	9817	0.030303	0.133775	0.516247
GO:0016646	oxidoreductase activity, acting on the CH-NH group of donors, NAD or NADP as acceptor	molecular_function	catalytic activity	1	183	13	17591	0.0769231	0.127153	0.516247
GO:0022824	transmitter-gated ion channel activity	molecular_function	transporter activity	1	183	14	17591	0.0714286	0.13624	0.516247
GO:0022835	transmitter-gated channel activity	molecular_function	transporter activity	1	183	14	17591	0.0714286	0.13624	0.516247
GO:0030594	neurotransmitter receptor activity	molecular_function	molecular transducer activity	1	183	14	17591	0.0714286	0.13624	0.516247
GO:0043565	sequence-specific DNA binding	molecular_function	binding	7	183	409	17591	0.0171149	0.135382	0.516247
GO:0044434	chloroplast part	cellular_component	organelle part	10	120	732	13066	0.0136612	0.135375	0.516247
GO:0046653	tetrahydrofolate metabolic process	biological_process	cellular process	1	95	14	9817	0.0714286	0.127358	0.516247
GO:0048037	cofactor binding	molecular_function	binding	18	183	1296	17591	0.0138889	0.128285	0.516247
GO:0060918	auxin transport	biological_process	biological regulation	1	95	15	9817	0.0666667	0.135815	0.516247
GO:0061640	cytoskeleton-dependent cytokinesis	biological_process	cellular process	1	95	14	9817	0.0714286	0.127358	0.516247
GO:0090627	plant epidermal cell differentiation	biological_process	cellular process	1	95	15	9817	0.0666667	0.135815	0.516247
GO:0090696	post-embryonic plant organ development	biological_process	multicellular organismal process	1	95	14	9817	0.0714286	0.127358	0.516247
GO:1901568	fatty acid derivative metabolic process	biological_process	metabolic process	1	95	14	9817	0.0714286	0.127358	0.516247
GO:0002161	aminoacyl-tRNA editing activity	molecular_function	catalytic activity	1	183	15	17591	0.0666667	0.145233	0.522581
GO:0008970	phospholipase A1 activity	molecular_function	catalytic activity	1	183	15	17591	0.0666667	0.145233	0.522581
GO:0009790	embryo development	biological_process	multicellular organismal process	2	95	69	9817	0.0289855	0.14369	0.522581
GO:0009793	embryo development ending in seed dormancy	biological_process	multicellular organismal process	2	95	69	9817	0.0289855	0.14369	0.522581
GO:0009856	pollination	biological_process	multi-organism process	3	95	136	9817	0.0220588	0.144698	0.522581
GO:0010383	cell wall polysaccharide metabolic process	biological_process	cellular process	2	95	70	9817	0.0285714	0.147029	0.522581
GO:0015276	ligand-gated ion channel activity	molecular_function	transporter activity	1	183	15	17591	0.0666667	0.145233	0.522581
GO:0016036	cellular response to phosphate starvation	biological_process	cellular process	1	95	16	9817	0.0625	0.14419	0.522581
GO:0016616	oxidoreductase activity, acting on the CH-OH group of donors, NAD or NADP as acceptor	molecular_function	catalytic activity	3	183	127	17591	0.023622	0.146378	0.522581
GO:0022834	ligand-gated channel activity	molecular_function	transporter activity	1	183	15	17591	0.0666667	0.145233	0.522581
GO:0044273	sulfur compound catabolic process	biological_process	cellular process	1	95	16	9817	0.0625	0.14419	0.522581
GO:0044435	plastid part	cellular_component	organelle part	10	120	745	13066	0.0134228	0.146681	0.522581
GO:0044706	multi-multicellular organism process	biological_process	multi-organism process	3	95	136	9817	0.0220588	0.144698	0.522581
GO:0046527	glucosyltransferase activity	molecular_function	catalytic activity	3	183	127	17591	0.023622	0.146378	0.522581
GO:0048580	regulation of post-embryonic development	biological_process	biological regulation	2	95	69	9817	0.0289855	0.14369	0.522581
GO:1901605	alpha-amino acid metabolic process	biological_process	cellular process	4	95	207	9817	0.0193237	0.140612	0.522581
GO:0000079	regulation of cyclin-dependent protein serine/threonine kinase activity	biological_process	biological regulation	1	95	17	9817	0.0588235	0.152485	0.529656
GO:0016197	endosomal transport	biological_process	localization	1	95	17	9817	0.0588235	0.152485	0.529656
GO:0051213	dioxygenase activity	molecular_function	catalytic activity	3	183	129	17591	0.0232558	0.151269	0.529656
GO:0098657	import into cell	biological_process	localization	1	95	17	9817	0.0588235	0.152485	0.529656
GO:1904029	regulation of cyclin-dependent protein kinase activity	biological_process	biological regulation	1	95	17	9817	0.0588235	0.152485	0.529656
GO:1905393	plant organ formation	biological_process	developmental process	1	95	17	9817	0.0588235	0.152485	0.529656
GO:0003006	developmental process involved in reproduction	biological_process	reproductive process	4	95	214	9817	0.0186916	0.153094	0.529764
GO:0016641	oxidoreductase activity, acting on the CH-NH2 group of donors, oxygen as acceptor	molecular_function	catalytic activity	1	183	16	17591	0.0625	0.154132	0.531351
GO:0032501	multicellular organismal process	biological_process	multicellular organismal process	8	95	546	9817	0.014652	0.15786	0.542164
GO:0005985	sucrose metabolic process	biological_process	cellular process	1	95	18	9817	0.0555556	0.160701	0.547817
GO:0009694	jasmonic acid metabolic process	biological_process	biological regulation	1	95	18	9817	0.0555556	0.160701	0.547817
GO:0016411	acylglycerol O-acyltransferase activity	molecular_function	catalytic activity	1	183	17	17591	0.0588235	0.16294	0.553392
GO:0042445	hormone metabolic process	biological_process	biological regulation	2	95	75	9817	0.0266667	0.163955	0.554785
GO:0006760	folic acid-containing compound metabolic process	biological_process	cellular process	1	95	19	9817	0.0526316	0.168838	0.556922
GO:0009553	embryo sac development	biological_process	multicellular organismal process	1	95	19	9817	0.0526316	0.168838	0.556922
GO:0009605	response to external stimulus	biological_process	response to stimulus	4	95	221	9817	0.0180995	0.165985	0.556922
GO:0009791	post-embryonic development	biological_process	multicellular organismal process	4	95	222	9817	0.018018	0.167858	0.556922
GO:0009835	fruit ripening	biological_process	multicellular organismal process	1	95	19	9817	0.0526316	0.168838	0.556922
GO:0048856	anatomical structure development	biological_process	developmental process	7	95	469	9817	0.0149254	0.16825	0.556922
GO:0048868	pollen tube development	biological_process	multi-organism process	1	95	19	9817	0.0526316	0.168838	0.556922
GO:0005768	endosome	cellular_component	cell	2	120	82	13066	0.0243902	0.17376	0.563244
GO:0006073	cellular glucan metabolic process	biological_process	cellular process	3	95	149	9817	0.0201342	0.174962	0.563244
GO:0006555	methionine metabolic process	biological_process	cellular process	1	95	20	9817	0.05	0.176897	0.563244
GO:0006730	one-carbon metabolic process	biological_process	cellular process	1	95	20	9817	0.05	0.176897	0.563244
GO:0010228	vegetative to reproductive phase transition of meristem	biological_process	multicellular organismal process	1	95	20	9817	0.05	0.176897	0.563244
GO:0015698	inorganic anion transport	biological_process	localization	1	95	20	9817	0.05	0.176897	0.563244
GO:0042558	pteridine-containing compound metabolic process	biological_process	cellular process	1	95	20	9817	0.05	0.176897	0.563244
GO:0044042	glucan metabolic process	biological_process	metabolic process	3	95	149	9817	0.0201342	0.174962	0.563244
GO:0045017	glycerolipid biosynthetic process	biological_process	cellular process	2	95	78	9817	0.025641	0.174272	0.563244
GO:0090698	post-embryonic plant morphogenesis	biological_process	developmental process	1	95	20	9817	0.05	0.176897	0.563244
GO:0003700	DNA-binding transcription factor activity	molecular_function	transcription regulator activity	9	183	604	17591	0.0149007	0.178922	0.567722
GO:0042802	identical protein binding	molecular_function	binding	2	183	74	17591	0.027027	0.179788	0.568269
GO:0044459	plasma membrane part	cellular_component	cell	2	120	84	13066	0.0238095	0.180334	0.568269
GO:0006241	CTP biosynthetic process	biological_process	cellular process	1	95	21	9817	0.047619	0.184878	0.568904
GO:0009148	pyrimidine nucleoside triphosphate biosynthetic process	biological_process	cellular process	1	95	21	9817	0.047619	0.184878	0.568904
GO:0009208	pyrimidine ribonucleoside triphosphate metabolic process	biological_process	cellular process	1	95	21	9817	0.047619	0.184878	0.568904
GO:0009209	pyrimidine ribonucleoside triphosphate biosynthetic process	biological_process	cellular process	1	95	21	9817	0.047619	0.184878	0.568904
GO:0034404	nucleobase-containing small molecule biosynthetic process	biological_process	cellular process	2	95	81	9817	0.0246914	0.184693	0.568904
GO:0046036	CTP metabolic process	biological_process	cellular process	1	95	21	9817	0.047619	0.184878	0.568904
GO:0071900	regulation of protein serine/threonine kinase activity	biological_process	biological regulation	1	95	21	9817	0.047619	0.184878	0.568904
GO:0016747	transferase activity, transferring acyl groups other than amino-acyl groups	molecular_function	catalytic activity	5	183	294	17591	0.0170068	0.192427	0.590152
GO:0003684	damaged DNA binding	molecular_function	binding	1	183	21	17591	0.047619	0.197268	0.590742
GO:0005200	structural constituent of cytoskeleton	molecular_function	structural molecule activity	1	183	21	17591	0.047619	0.197268	0.590742
GO:0007275	multicellular organism development	biological_process	multicellular organismal process	6	95	407	9817	0.014742	0.200994	0.590742
GO:0009218	pyrimidine ribonucleotide metabolic process	biological_process	cellular process	1	95	23	9817	0.0434783	0.200612	0.590742
GO:0009220	pyrimidine ribonucleotide biosynthetic process	biological_process	cellular process	1	95	23	9817	0.0434783	0.200612	0.590742
GO:0009507	chloroplast	cellular_component	cell	14	120	1185	13066	0.0118143	0.197735	0.590742
GO:0016614	oxidoreductase activity, acting on CH-OH group of donors	molecular_function	catalytic activity	3	183	146	17591	0.0205479	0.194737	0.590742
GO:0030154	cell differentiation	biological_process	cellular process	2	95	85	9817	0.0235294	0.198722	0.590742
GO:0042546	cell wall biogenesis	biological_process	cellular component organization or biogenesis	2	95	84	9817	0.0238095	0.195202	0.590742
GO:0046131	pyrimidine ribonucleoside metabolic process	biological_process	cellular process	1	95	23	9817	0.0434783	0.200612	0.590742
GO:0046132	pyrimidine ribonucleoside biosynthetic process	biological_process	cellular process	1	95	23	9817	0.0434783	0.200612	0.590742
GO:0046134	pyrimidine nucleoside biosynthetic process	biological_process	cellular process	1	95	23	9817	0.0434783	0.200612	0.590742
GO:1902531	regulation of intracellular signal transduction	biological_process	biological regulation	1	95	23	9817	0.0434783	0.200612	0.590742
GO:0009888	tissue development	biological_process	developmental process	2	95	86	9817	0.0232558	0.20225	0.592536
GO:0044262	cellular carbohydrate metabolic process	biological_process	cellular process	4	95	241	9817	0.0165975	0.204801	0.598098
GO:0019904	protein domain specific binding	molecular_function	binding	1	183	22	17591	0.0454545	0.205628	0.598607
GO:0006213	pyrimidine nucleoside metabolic process	biological_process	cellular process	1	95	24	9817	0.0416667	0.208366	0.600846
GO:0009147	pyrimidine nucleoside triphosphate metabolic process	biological_process	cellular process	1	95	24	9817	0.0416667	0.208366	0.600846
GO:0009267	cellular response to starvation	biological_process	cellular process	1	95	24	9817	0.0416667	0.208366	0.600846
GO:0019752	carboxylic acid metabolic process	biological_process	cellular process	9	95	679	9817	0.0132548	0.209674	0.600846
GO:0048316	seed development	biological_process	multicellular organismal process	2	95	88	9817	0.0227273	0.209329	0.600846
GO:0004497	monooxygenase activity	molecular_function	catalytic activity	5	183	304	17591	0.0164474	0.210652	0.601769
GO:0000049	tRNA binding	molecular_function	binding	1	183	23	17591	0.0434783	0.213903	0.603535
GO:0004499	N,N-dimethylaniline monooxygenase activity	molecular_function	catalytic activity	1	183	23	17591	0.0434783	0.213903	0.603535
GO:0019901	protein kinase binding	molecular_function	binding	1	183	23	17591	0.0434783	0.213903	0.603535
GO:0031418	L-ascorbic acid binding	molecular_function	binding	1	183	23	17591	0.0434783	0.213903	0.603535
GO:0009082	branched-chain amino acid biosynthetic process	biological_process	cellular process	1	95	25	9817	0.04	0.216046	0.604006
GO:0009814	defense response, incompatible interaction	biological_process	multi-organism process	1	95	25	9817	0.04	0.216046	0.604006
GO:0010015	root morphogenesis	biological_process	multicellular organismal process	1	95	25	9817	0.04	0.216046	0.604006
GO:0050660	flavin adenine dinucleotide binding	molecular_function	binding	3	183	155	17591	0.0193548	0.218879	0.610067
GO:0004565	beta-galactosidase activity	molecular_function	catalytic activity	1	183	24	17591	0.0416667	0.222091	0.617144
GO:0002831	regulation of response to biotic stimulus	biological_process	biological regulation	1	95	26	9817	0.0384615	0.223651	0.617736
GO:0006006	glucose metabolic process	biological_process	metabolic process	1	95	26	9817	0.0384615	0.223651	0.617736
GO:0043436	oxoacid metabolic process	biological_process	cellular process	9	95	694	9817	0.0129683	0.227845	0.627428
GO:0006082	organic acid metabolic process	biological_process	cellular process	9	95	696	9817	0.012931	0.230313	0.630439
GO:0017056	structural constituent of nuclear pore	molecular_function	structural molecule activity	1	183	25	17591	0.04	0.230195	0.630439
GO:0032101	regulation of response to external stimulus	biological_process	biological regulation	1	95	27	9817	0.037037	0.231184	0.63094
GO:0009536	plastid	cellular_component	cell	14	120	1226	13066	0.0114192	0.233922	0.636519
GO:0005102	signaling receptor binding	molecular_function	binding	1	183	26	17591	0.0384615	0.238215	0.640825
GO:0008236	serine-type peptidase activity	molecular_function	catalytic activity	4	183	240	17591	0.0166667	0.240397	0.640825
GO:0009081	branched-chain amino acid metabolic process	biological_process	cellular process	1	95	28	9817	0.0357143	0.238645	0.640825
GO:0017171	serine hydrolase activity	molecular_function	catalytic activity	4	183	240	17591	0.0166667	0.240397	0.640825
GO:0031669	cellular response to nutrient levels	biological_process	cellular process	1	95	28	9817	0.0357143	0.238645	0.640825
GO:0044264	cellular polysaccharide metabolic process	biological_process	cellular process	3	95	174	9817	0.0172414	0.237321	0.640825
GO:0046906	tetrapyrrole binding	molecular_function	binding	8	183	568	17591	0.0140845	0.240315	0.640825
GO:0008152	metabolic process	biological_process	metabolic process	59	95	5698	9817	0.0103545	0.242333	0.644113
GO:0007389	pattern specification process	biological_process	multicellular organismal process	1	95	29	9817	0.0344828	0.246033	0.648623
GO:0009606	tropism	biological_process	response to stimulus	1	95	29	9817	0.0344828	0.246033	0.648623
GO:0016645	oxidoreductase activity, acting on the CH-NH group of donors	molecular_function	catalytic activity	1	183	27	17591	0.037037	0.246151	0.648623
GO:0005085	guanyl-nucleotide exchange factor activity	molecular_function	molecular function regulator	1	183	28	17591	0.0357143	0.254006	0.658989
GO:0009522	photosystem I	cellular_component	cell	2	120	106	13066	0.0188679	0.254397	0.658989
GO:0009826	unidimensional cell growth	biological_process	cellular component organization or biogenesis	1	95	30	9817	0.0333333	0.253351	0.658989
GO:0015925	galactosidase activity	molecular_function	catalytic activity	1	183	28	17591	0.0357143	0.254006	0.658989
GO:0019900	kinase binding	molecular_function	binding	1	183	28	17591	0.0357143	0.254006	0.658989
GO:0044036	cell wall macromolecule metabolic process	biological_process	cellular process	2	95	100	9817	0.02	0.25222	0.658989
GO:0005643	nuclear pore	cellular_component	organelle part	1	120	32	13066	0.03125	0.255917	0.659481
GO:0019318	hexose metabolic process	biological_process	metabolic process	2	95	102	9817	0.0196078	0.259409	0.659481
GO:0019842	vitamin binding	molecular_function	binding	3	183	170	17591	0.0176471	0.26032	0.659481
GO:0031668	cellular response to extracellular stimulus	biological_process	cellular process	1	95	31	9817	0.0322581	0.260599	0.659481
GO:0042594	response to starvation	biological_process	response to stimulus	1	95	31	9817	0.0322581	0.260599	0.659481
GO:0043900	regulation of multi-organism process	biological_process	biological regulation	1	95	31	9817	0.0322581	0.260599	0.659481
GO:0048646	anatomical structure formation involved in morphogenesis	biological_process	developmental process	1	95	31	9817	0.0322581	0.260599	0.659481
GO:0061630	ubiquitin protein ligase activity	molecular_function	catalytic activity	1	183	29	17591	0.0344828	0.261779	0.659481
GO:0061659	ubiquitin-like protein ligase activity	molecular_function	catalytic activity	1	183	29	17591	0.0344828	0.261779	0.659481
GO:0071496	cellular response to external stimulus	biological_process	response to stimulus	1	95	31	9817	0.0322581	0.260599	0.659481
GO:0032300	mismatch repair complex	cellular_component	cell	1	120	33	13066	0.030303	0.262768	0.660159
GO:1990837	sequence-specific double-stranded DNA binding	molecular_function	binding	2	183	96	17591	0.0208333	0.263742	0.660795
GO:0006637	acyl-CoA metabolic process	biological_process	cellular process	1	95	32	9817	0.03125	0.267777	0.661863
GO:0035383	thioester metabolic process	biological_process	cellular process	1	95	32	9817	0.03125	0.267777	0.661863
GO:0045088	regulation of innate immune response	biological_process	biological regulation	1	95	32	9817	0.03125	0.267777	0.661863
GO:0050776	regulation of immune response	biological_process	biological regulation	1	95	32	9817	0.03125	0.267777	0.661863
GO:0140110	transcription regulator activity	molecular_function	transcription regulator activity	9	183	671	17591	0.0134128	0.265012	0.661863
GO:1990391	DNA repair complex	cellular_component	protein-containing complex	1	120	34	13066	0.0294118	0.269556	0.664469
GO:0008037	cell recognition	biological_process	cellular process	2	95	106	9817	0.0188679	0.273793	0.668621
GO:0019953	sexual reproduction	biological_process	multi-organism process	1	95	33	9817	0.030303	0.274886	0.668621
GO:0048468	cell development	biological_process	cellular process	1	95	33	9817	0.030303	0.274886	0.668621
GO:0048544	recognition of pollen	biological_process	multi-organism process	2	95	106	9817	0.0188679	0.273793	0.668621
GO:0060560	developmental growth involved in morphogenesis	biological_process	growth	1	95	33	9817	0.030303	0.274886	0.668621
GO:0001067	regulatory region nucleic acid binding	molecular_function	binding	2	183	100	17591	0.02	0.27917	0.671497
GO:0006357	regulation of transcription by RNA polymerase II	biological_process	biological regulation	2	95	108	9817	0.0185185	0.280984	0.671497
GO:0009163	nucleoside biosynthetic process	biological_process	cellular process	1	95	34	9817	0.0294118	0.281926	0.671497
GO:0009875	pollen-pistil interaction	biological_process	multi-organism process	2	95	107	9817	0.0186916	0.277389	0.671497
GO:0042455	ribonucleoside biosynthetic process	biological_process	cellular process	1	95	34	9817	0.0294118	0.281926	0.671497
GO:0044212	transcription regulatory region DNA binding	molecular_function	binding	2	183	100	17591	0.02	0.27917	0.671497
GO:0045859	regulation of protein kinase activity	biological_process	biological regulation	1	95	34	9817	0.0294118	0.281926	0.671497
GO:0098813	nuclear chromosome segregation	biological_process	cellular process	1	95	34	9817	0.0294118	0.281926	0.671497
GO:0001932	regulation of protein phosphorylation	biological_process	biological regulation	1	95	35	9817	0.0285714	0.288899	0.67636
GO:0005996	monosaccharide metabolic process	biological_process	metabolic process	2	95	111	9817	0.018018	0.29176	0.67636
GO:0006091	generation of precursor metabolites and energy	biological_process	cellular process	5	95	372	9817	0.0134409	0.291603	0.67636
GO:0006950	response to stress	biological_process	response to stimulus	12	95	1030	9817	0.0116505	0.292081	0.67636
GO:0033036	macromolecule localization	biological_process	localization	7	95	556	9817	0.0125899	0.291876	0.67636
GO:0043549	regulation of kinase activity	biological_process	biological regulation	1	95	35	9817	0.0285714	0.288899	0.67636
GO:0044703	multi-organism reproductive process	biological_process	multi-organism process	1	95	35	9817	0.0285714	0.288899	0.67636
GO:0045893	positive regulation of transcription, DNA-templated	biological_process	biological regulation	2	95	111	9817	0.018018	0.29176	0.67636
GO:1901659	glycosyl compound biosynthetic process	biological_process	metabolic process	1	95	35	9817	0.0285714	0.288899	0.67636
GO:1902680	positive regulation of RNA biosynthetic process	biological_process	biological regulation	2	95	111	9817	0.018018	0.29176	0.67636
GO:1903508	positive regulation of nucleic acid-templated transcription	biological_process	biological regulation	2	95	111	9817	0.018018	0.29176	0.67636
GO:0009066	aspartate family amino acid metabolic process	biological_process	cellular process	1	95	36	9817	0.0277778	0.295805	0.678794
GO:0031968	organelle outer membrane	cellular_component	organelle part	1	120	38	13066	0.0263158	0.296093	0.678794
GO:0042325	regulation of phosphorylation	biological_process	biological regulation	1	95	36	9817	0.0277778	0.295805	0.678794
GO:0048731	system development	biological_process	multicellular organismal process	4	95	284	9817	0.0140845	0.295431	0.678794
GO:0000096	sulfur amino acid metabolic process	biological_process	cellular process	1	95	37	9817	0.027027	0.302645	0.681881
GO:0002682	regulation of immune system process	biological_process	biological regulation	1	95	37	9817	0.027027	0.302645	0.681881
GO:0006221	pyrimidine nucleotide biosynthetic process	biological_process	cellular process	1	95	37	9817	0.027027	0.302645	0.681881
GO:0007059	chromosome segregation	biological_process	cellular process	1	95	37	9817	0.027027	0.302645	0.681881
GO:0007568	aging	biological_process	developmental process	1	95	37	9817	0.027027	0.302645	0.681881
GO:0008061	chitin binding	molecular_function	binding	1	183	34	17591	0.0294118	0.299452	0.681881
GO:0051254	positive regulation of RNA metabolic process	biological_process	biological regulation	2	95	113	9817	0.0176991	0.298934	0.681881
GO:0004190	aspartic-type endopeptidase activity	molecular_function	catalytic activity	3	183	187	17591	0.0160428	0.308363	0.685355
GO:0005635	nuclear envelope	cellular_component	organelle part	1	120	40	13066	0.025	0.309001	0.685355
GO:0005984	disaccharide metabolic process	biological_process	cellular process	1	95	38	9817	0.0263158	0.309419	0.685355
GO:0016049	cell growth	biological_process	cellular process	1	95	38	9817	0.0263158	0.309419	0.685355
GO:0016709	oxidoreductase activity, acting on paired donors, with incorporation or reduction of molecular oxygen, NAD(P)H as one donor, and incorporation of one atom of oxygen	molecular_function	catalytic activity	1	183	35	17591	0.0285714	0.306754	0.685355
GO:0031667	response to nutrient levels	biological_process	response to stimulus	1	95	38	9817	0.0263158	0.309419	0.685355
GO:0070001	aspartic-type peptidase activity	molecular_function	catalytic activity	3	183	187	17591	0.0160428	0.308363	0.685355
GO:0003690	double-stranded DNA binding	molecular_function	binding	3	183	189	17591	0.015873	0.314051	0.687393
GO:0018298	protein-chromophore linkage	biological_process	cellular process	2	95	117	9817	0.017094	0.313248	0.687393
GO:0031984	organelle subcompartment	cellular_component	organelle part	8	120	700	13066	0.0114286	0.314087	0.687393
GO:0045935	positive regulation of nucleobase-containing compound metabolic process	biological_process	biological regulation	2	95	117	9817	0.017094	0.313248	0.687393
GO:0048029	monosaccharide binding	molecular_function	binding	1	183	36	17591	0.0277778	0.31398	0.687393
GO:0019867	outer membrane	cellular_component	membrane	1	120	41	13066	0.0243902	0.315367	0.688551
GO:0006220	pyrimidine nucleotide metabolic process	biological_process	cellular process	1	95	39	9817	0.025641	0.316128	0.688573
GO:0016746	transferase activity, transferring acyl groups	molecular_function	catalytic activity	5	183	359	17591	0.0139276	0.318654	0.69243
GO:0048869	cellular developmental process	biological_process	cellular process	2	95	119	9817	0.0168067	0.320384	0.694544
GO:0009772	photosynthetic electron transport in photosystem II	biological_process	cellular process	1	95	40	9817	0.025	0.322772	0.698071
GO:0005199	structural constituent of cell wall	molecular_function	structural molecule activity	1	183	38	17591	0.0263158	0.328208	0.700734
GO:0007131	reciprocal meiotic recombination	biological_process	cellular component organization or biogenesis	1	95	41	9817	0.0243902	0.329352	0.700734
GO:0009765	photosynthesis, light harvesting	biological_process	cellular process	1	95	41	9817	0.0243902	0.329352	0.700734
GO:0009991	response to extracellular stimulus	biological_process	response to stimulus	1	95	41	9817	0.0243902	0.329352	0.700734
GO:0016168	chlorophyll binding	molecular_function	binding	2	183	112	17591	0.0178571	0.32523	0.700734
GO:0035825	homologous recombination	biological_process	cellular process	1	95	41	9817	0.0243902	0.329352	0.700734
GO:0042446	hormone biosynthetic process	biological_process	biological regulation	1	95	41	9817	0.0243902	0.329352	0.700734
GO:0046486	glycerolipid metabolic process	biological_process	cellular process	2	95	122	9817	0.0163934	0.331055	0.702726
GO:0004674	protein serine/threonine kinase activity	molecular_function	catalytic activity	8	183	632	17591	0.0126582	0.336665	0.709562
GO:0009166	nucleotide catabolic process	biological_process	cellular process	1	95	42	9817	0.0238095	0.335869	0.709562
GO:0010557	positive regulation of macromolecule biosynthetic process	biological_process	biological regulation	2	95	124	9817	0.016129	0.338145	0.709562
GO:0051187	cofactor catabolic process	biological_process	cellular process	2	95	124	9817	0.016129	0.338145	0.709562
GO:0090558	plant epidermis development	biological_process	developmental process	1	95	42	9817	0.0238095	0.335869	0.709562
GO:0006004	fucose metabolic process	biological_process	metabolic process	1	95	43	9817	0.0232558	0.342324	0.710206
GO:0007127	meiosis I	biological_process	cellular component organization or biogenesis	1	95	43	9817	0.0232558	0.342324	0.710206
GO:0014070	response to organic cyclic compound	biological_process	response to stimulus	1	95	43	9817	0.0232558	0.342324	0.710206
GO:0019899	enzyme binding	molecular_function	binding	2	183	116	17591	0.0172414	0.340436	0.710206
GO:0020037	heme binding	molecular_function	binding	6	183	458	17591	0.0131004	0.342012	0.710206
GO:0006298	mismatch repair	biological_process	cellular process	1	95	46	9817	0.0217391	0.361317	0.713611
GO:0006955	immune response	biological_process	response to stimulus	1	95	44	9817	0.0227273	0.348716	0.713611
GO:0007017	microtubule-based process	biological_process	cellular process	2	95	131	9817	0.0152672	0.362774	0.713611
GO:0008374	O-acyltransferase activity	molecular_function	catalytic activity	1	183	43	17591	0.0232558	0.362509	0.713611
GO:0009611	response to wounding	biological_process	response to stimulus	1	95	46	9817	0.0217391	0.361317	0.713611
GO:0009891	positive regulation of biosynthetic process	biological_process	biological regulation	2	95	130	9817	0.0153846	0.359275	0.713611
GO:0010628	positive regulation of gene expression	biological_process	biological regulation	2	95	129	9817	0.0155039	0.355769	0.713611
GO:0015298	solute:cation antiporter activity	molecular_function	transporter activity	1	183	42	17591	0.0238095	0.355791	0.713611
GO:0015299	solute:proton antiporter activity	molecular_function	transporter activity	1	183	42	17591	0.0238095	0.355791	0.713611
GO:0016740	transferase activity	molecular_function	catalytic activity	45	183	4094	17591	0.0109917	0.36342	0.713611
GO:0030983	mismatched DNA binding	molecular_function	binding	1	183	43	17591	0.0232558	0.362509	0.713611
GO:0031328	positive regulation of cellular biosynthetic process	biological_process	biological regulation	2	95	130	9817	0.0153846	0.359275	0.713611
GO:0032259	methylation	biological_process	metabolic process	1	95	46	9817	0.0217391	0.361317	0.713611
GO:0033865	nucleoside bisphosphate metabolic process	biological_process	cellular process	1	95	46	9817	0.0217391	0.361317	0.713611
GO:0033875	ribonucleoside bisphosphate metabolic process	biological_process	cellular process	1	95	46	9817	0.0217391	0.361317	0.713611
GO:0034032	purine nucleoside bisphosphate metabolic process	biological_process	cellular process	1	95	46	9817	0.0217391	0.361317	0.713611
GO:0043414	macromolecule methylation	biological_process	cellular process	1	95	46	9817	0.0217391	0.361317	0.713611
GO:0045087	innate immune response	biological_process	response to stimulus	1	95	44	9817	0.0227273	0.348716	0.713611
GO:0048589	developmental growth	biological_process	growth	1	95	45	9817	0.0222222	0.355047	0.713611
GO:0051338	regulation of transferase activity	biological_process	biological regulation	1	95	44	9817	0.0227273	0.348716	0.713611
GO:0061982	meiosis I cell cycle process	biological_process	cellular process	1	95	45	9817	0.0222222	0.355047	0.713611
GO:0072657	protein localization to membrane	biological_process	localization	1	95	46	9817	0.0217391	0.361317	0.713611
GO:0098542	defense response to other organism	biological_process	multi-organism process	2	95	128	9817	0.015625	0.352256	0.713611
GO:1901606	alpha-amino acid catabolic process	biological_process	cellular process	1	95	46	9817	0.0217391	0.361317	0.713611
GO:1905392	plant organ morphogenesis	biological_process	multicellular organismal process	1	95	44	9817	0.0227273	0.348716	0.713611
GO:0000902	cell morphogenesis	biological_process	cellular component organization or biogenesis	1	95	47	9817	0.0212766	0.367527	0.717069
GO:0009311	oligosaccharide metabolic process	biological_process	metabolic process	1	95	47	9817	0.0212766	0.367527	0.717069
GO:1901292	nucleoside phosphate catabolic process	biological_process	cellular process	1	95	47	9817	0.0212766	0.367527	0.717069
GO:0022402	cell cycle process	biological_process	cellular process	2	95	133	9817	0.0150376	0.369752	0.719878
GO:0009063	cellular amino acid catabolic process	biological_process	cellular process	1	95	48	9817	0.0208333	0.373677	0.721393
GO:0009119	ribonucleoside metabolic process	biological_process	cellular process	1	95	48	9817	0.0208333	0.373677	0.721393
GO:0019220	regulation of phosphate metabolic process	biological_process	biological regulation	1	95	48	9817	0.0208333	0.373677	0.721393
GO:0051174	regulation of phosphorus metabolic process	biological_process	biological regulation	1	95	48	9817	0.0208333	0.373677	0.721393
GO:0008094	DNA-dependent ATPase activity	molecular_function	catalytic activity	1	183	45	17591	0.0222222	0.375736	0.723844
GO:0030170	pyridoxal phosphate binding	molecular_function	binding	2	183	126	17591	0.015873	0.377949	0.725061
GO:0070279	vitamin B6 binding	molecular_function	binding	2	183	126	17591	0.015873	0.377949	0.725061
GO:0072528	pyrimidine-containing compound biosynthetic process	biological_process	cellular process	1	95	49	9817	0.0204082	0.379768	0.727029
GO:0002376	immune system process	biological_process	immune system process	1	95	50	9817	0.02	0.3858	0.73246
GO:0009555	pollen development	biological_process	multicellular organismal process	1	95	50	9817	0.02	0.3858	0.73246
GO:0040007	growth	biological_process	growth	1	95	50	9817	0.02	0.3858	0.73246
GO:1903047	mitotic cell cycle process	biological_process	cellular process	1	95	50	9817	0.02	0.3858	0.73246
GO:0004888	transmembrane signaling receptor activity	molecular_function	molecular transducer activity	1	183	47	17591	0.0212766	0.38869	0.736423
GO:0005802	trans-Golgi network	cellular_component	organelle part	1	120	54	13066	0.0185185	0.393016	0.743084
GO:0004620	phospholipase activity	molecular_function	catalytic activity	1	183	48	17591	0.0208333	0.395067	0.743894
GO:0008276	protein methyltransferase activity	molecular_function	catalytic activity	1	183	48	17591	0.0208333	0.395067	0.743894
GO:0006575	cellular modified amino acid metabolic process	biological_process	cellular process	1	95	52	9817	0.0192308	0.397691	0.745771
GO:0016567	protein ubiquitination	biological_process	cellular process	1	95	52	9817	0.0192308	0.397691	0.745771
GO:0051020	GTPase binding	molecular_function	binding	1	183	49	17591	0.0204082	0.401377	0.751149
GO:0031406	carboxylic acid binding	molecular_function	binding	1	183	50	17591	0.02	0.407622	0.759734
GO:0043177	organic acid binding	molecular_function	binding	1	183	50	17591	0.02	0.407622	0.759734
GO:0043207	response to external biotic stimulus	biological_process	response to stimulus	2	95	145	9817	0.0137931	0.410954	0.762843
GO:0051707	response to other organism	biological_process	multi-organism process	2	95	145	9817	0.0137931	0.410954	0.762843
GO:0016866	intramolecular transferase activity	molecular_function	catalytic activity	1	183	51	17591	0.0196078	0.413802	0.764352
GO:0031399	regulation of protein modification process	biological_process	biological regulation	1	95	55	9817	0.0181818	0.415101	0.764352
GO:0072527	pyrimidine-containing compound metabolic process	biological_process	cellular process	1	95	55	9817	0.0181818	0.415101	0.764352
GO:0140013	meiotic nuclear division	biological_process	cellular component organization or biogenesis	1	95	55	9817	0.0181818	0.415101	0.764352
GO:0010333	terpene synthase activity	molecular_function	catalytic activity	1	183	52	17591	0.0192308	0.419918	0.770194
GO:0032989	cellular component morphogenesis	biological_process	cellular component organization or biogenesis	1	95	56	9817	0.0178571	0.420793	0.770194
GO:0043648	dicarboxylic acid metabolic process	biological_process	cellular process	1	95	56	9817	0.0178571	0.420793	0.770194
GO:0031967	organelle envelope	cellular_component	organelle part	5	120	465	13066	0.0107527	0.42503	0.774856
GO:0031975	envelope	cellular_component	cell	5	120	465	13066	0.0107527	0.42503	0.774856
GO:0006418	tRNA aminoacylation for protein translation	biological_process	cellular process	1	95	58	9817	0.0172414	0.432013	0.784467
GO:0007018	microtubule-based movement	biological_process	cellular process	1	95	58	9817	0.0172414	0.432013	0.784467
GO:0006820	anion transport	biological_process	localization	1	95	59	9817	0.0169492	0.437542	0.789815
GO:0006928	movement of cell or subcellular component	biological_process	cellular process	1	95	59	9817	0.0169492	0.437542	0.789815
GO:0031347	regulation of defense response	biological_process	biological regulation	1	95	59	9817	0.0169492	0.437542	0.789815
GO:0009658	chloroplast organization	biological_process	cellular component organization or biogenesis	1	95	60	9817	0.0166667	0.443018	0.795005
GO:0022622	root system development	biological_process	multicellular organismal process	1	95	60	9817	0.0166667	0.443018	0.795005
GO:0048364	root development	biological_process	multicellular organismal process	1	95	60	9817	0.0166667	0.443018	0.795005
GO:0003777	microtubule motor activity	molecular_function	catalytic activity	1	183	58	17591	0.0172414	0.455304	0.801189
GO:0004812	aminoacyl-tRNA ligase activity	molecular_function	catalytic activity	1	183	59	17591	0.0169492	0.460989	0.801189
GO:0005543	phospholipid binding	molecular_function	binding	1	183	58	17591	0.0172414	0.455304	0.801189
GO:0005618	cell wall	cellular_component	cell	2	120	169	13066	0.0118343	0.46147	0.801189
GO:0005773	vacuole	cellular_component	cell	2	120	168	13066	0.0119048	0.458411	0.801189
GO:0007049	cell cycle	biological_process	cellular process	2	95	161	9817	0.0124224	0.463785	0.801189
GO:0008170	N-methyltransferase activity	molecular_function	catalytic activity	1	183	57	17591	0.0175439	0.449559	0.801189
GO:0016838	carbon-oxygen lyase activity, acting on phosphates	molecular_function	catalytic activity	1	183	57	17591	0.0175439	0.449559	0.801189
GO:0016875	ligase activity, forming carbon-oxygen bonds	molecular_function	catalytic activity	1	183	59	17591	0.0169492	0.460989	0.801189
GO:0030312	external encapsulating structure	cellular_component	cell	2	120	169	13066	0.0118343	0.46147	0.801189
GO:0031410	cytoplasmic vesicle	cellular_component	cell	2	120	169	13066	0.0118343	0.46147	0.801189
GO:0032446	protein modification by small protein conjugation	biological_process	cellular process	1	95	63	9817	0.015873	0.459131	0.801189
GO:0043038	amino acid activation	biological_process	cellular process	1	95	62	9817	0.016129	0.453812	0.801189
GO:0043039	tRNA aminoacylation	biological_process	cellular process	1	95	62	9817	0.016129	0.453812	0.801189
GO:0048229	gametophyte development	biological_process	multicellular organismal process	1	95	61	9817	0.0163934	0.448441	0.801189
GO:0051173	positive regulation of nitrogen compound metabolic process	biological_process	biological regulation	2	95	161	9817	0.0124224	0.463785	0.801189
GO:0052689	carboxylic ester hydrolase activity	molecular_function	catalytic activity	2	183	150	17591	0.0133333	0.463938	0.801189
GO:0055114	oxidation-reduction process	biological_process	metabolic process	4	95	355	9817	0.0112676	0.451527	0.801189
GO:0097708	intracellular vesicle	cellular_component	cell	2	120	169	13066	0.0118343	0.46147	0.801189
GO:1903046	meiotic cell cycle process	biological_process	cellular process	1	95	62	9817	0.016129	0.453812	0.801189
GO:0005516	calmodulin binding	molecular_function	binding	1	183	60	17591	0.0166667	0.466615	0.80194
GO:0006790	sulfur compound metabolic process	biological_process	cellular process	2	95	162	9817	0.0123457	0.466996	0.80194
GO:0010604	positive regulation of macromolecule metabolic process	biological_process	biological regulation	2	95	162	9817	0.0123457	0.466996	0.80194
GO:0000278	mitotic cell cycle	biological_process	cellular process	1	95	65	9817	0.0153846	0.469616	0.80493
GO:0016620	oxidoreductase activity, acting on the aldehyde or oxo group of donors, NAD or NADP as acceptor	molecular_function	catalytic activity	1	183	62	17591	0.016129	0.477693	0.817247
GO:0003755	peptidyl-prolyl cis-trans isomerase activity	molecular_function	catalytic activity	1	183	63	17591	0.015873	0.483146	0.818937
GO:0016627	oxidoreductase activity, acting on the CH-CH group of donors	molecular_function	catalytic activity	1	183	63	17591	0.015873	0.483146	0.818937
GO:0022839	ion gated channel activity	molecular_function	transporter activity	1	183	63	17591	0.015873	0.483146	0.818937
GO:0031982	vesicle	cellular_component	organelle	2	120	175	13066	0.0114286	0.479608	0.818937
GO:0048583	regulation of response to stimulus	biological_process	biological regulation	2	95	167	9817	0.011976	0.482887	0.818937
GO:0016054	organic acid catabolic process	biological_process	cellular process	1	95	68	9817	0.0147059	0.484967	0.818996
GO:0046395	carboxylic acid catabolic process	biological_process	cellular process	1	95	68	9817	0.0147059	0.484967	0.818996
GO:0016298	lipase activity	molecular_function	catalytic activity	1	183	64	17591	0.015625	0.488542	0.819922
GO:0022836	gated channel activity	molecular_function	transporter activity	1	183	64	17591	0.015625	0.488542	0.819922
GO:0031325	positive regulation of cellular metabolic process	biological_process	biological regulation	2	95	169	9817	0.0118343	0.489163	0.819922
GO:0051301	cell division	biological_process	cellular process	1	95	69	9817	0.0144928	0.489986	0.819922
GO:0051321	meiotic cell cycle	biological_process	cellular process	1	95	69	9817	0.0144928	0.489986	0.819922
GO:1902494	catalytic complex	cellular_component	protein-containing complex	4	120	396	13066	0.010101	0.495273	0.82726
GO:0016859	cis-trans isomerase activity	molecular_function	catalytic activity	1	183	66	17591	0.0151515	0.499167	0.832248
GO:0000280	nuclear division	biological_process	cellular component organization or biogenesis	1	95	72	9817	0.0138889	0.504754	0.838513
GO:0042742	defense response to bacterium	biological_process	multi-organism process	1	95	72	9817	0.0138889	0.504754	0.838513
GO:0006732	coenzyme metabolic process	biological_process	cellular process	2	95	176	9817	0.0113636	0.510755	0.846947
GO:0005874	microtubule	cellular_component	organelle part	1	120	78	13066	0.0128205	0.514129	0.849471
GO:0009893	positive regulation of metabolic process	biological_process	biological regulation	2	95	177	9817	0.0112994	0.513791	0.849471
GO:0006364	rRNA processing	biological_process	cellular component organization or biogenesis	1	95	75	9817	0.0133333	0.519098	0.850446
GO:0009116	nucleoside metabolic process	biological_process	cellular process	1	95	75	9817	0.0133333	0.519098	0.850446
GO:0009617	response to bacterium	biological_process	multi-organism process	1	95	75	9817	0.0133333	0.519098	0.850446
GO:0031969	chloroplast membrane	cellular_component	organelle part	1	120	80	13066	0.0125	0.523066	0.850446
GO:0050790	regulation of catalytic activity	biological_process	biological regulation	1	95	75	9817	0.0133333	0.519098	0.850446
GO:0099080	supramolecular complex	cellular_component	supramolecular complex	1	120	80	13066	0.0125	0.523066	0.850446
GO:0099081	supramolecular polymer	cellular_component	supramolecular complex	1	120	80	13066	0.0125	0.523066	0.850446
GO:0099512	supramolecular fiber	cellular_component	supramolecular complex	1	120	80	13066	0.0125	0.523066	0.850446
GO:0099513	polymeric cytoskeletal fiber	cellular_component	organelle part	1	120	80	13066	0.0125	0.523066	0.850446
GO:0022900	electron transport chain	biological_process	cellular process	2	95	181	9817	0.0110497	0.525814	0.853401
GO:0016072	rRNA metabolic process	biological_process	cellular process	1	95	77	9817	0.012987	0.528432	0.856135
GO:0009250	glucan biosynthetic process	biological_process	cellular process	1	95	78	9817	0.0128205	0.533032	0.860546
GO:0009414	response to water deprivation	biological_process	response to stimulus	1	95	78	9817	0.0128205	0.533032	0.860546
GO:0042170	plastid membrane	cellular_component	organelle part	1	120	83	13066	0.0120482	0.536167	0.864086
GO:0080134	regulation of response to stress	biological_process	biological regulation	1	95	79	9817	0.0126582	0.537587	0.864855
GO:0009657	plastid organization	biological_process	cellular component organization or biogenesis	1	95	81	9817	0.0123457	0.546565	0.877759
GO:0008299	isoprenoid biosynthetic process	biological_process	cellular process	1	95	82	9817	0.0121951	0.55099	0.88024
GO:0009415	response to water	biological_process	response to stimulus	1	95	82	9817	0.0121951	0.55099	0.88024
GO:0046914	transition metal ion binding	molecular_function	binding	16	183	1548	17591	0.0103359	0.54913	0.88024
GO:0009966	regulation of signal transduction	biological_process	biological regulation	1	95	83	9817	0.0120482	0.555372	0.882627
GO:0023051	regulation of signaling	biological_process	biological regulation	1	95	83	9817	0.0120482	0.555372	0.882627
GO:1901657	glycosyl compound metabolic process	biological_process	metabolic process	1	95	83	9817	0.0120482	0.555372	0.882627
GO:0004672	protein kinase activity	molecular_function	catalytic activity	14	183	1363	17591	0.0102715	0.560069	0.883964
GO:0005730	nucleolus	cellular_component	organelle part	1	120	88	13066	0.0113636	0.557213	0.883964
GO:0010646	regulation of cell communication	biological_process	biological regulation	1	95	84	9817	0.0119048	0.559711	0.883964
GO:0032268	regulation of cellular protein metabolic process	biological_process	biological regulation	1	95	84	9817	0.0119048	0.559711	0.883964
GO:0016758	transferase activity, transferring hexosyl groups	molecular_function	catalytic activity	5	183	480	17591	0.0104167	0.561677	0.884979
GO:0009570	chloroplast stroma	cellular_component	organelle part	3	120	321	13066	0.00934579	0.568757	0.893065
GO:0065009	regulation of molecular function	biological_process	biological regulation	1	95	86	9817	0.0116279	0.568264	0.893065
GO:0005509	calcium ion binding	molecular_function	binding	3	183	285	17591	0.0105263	0.571814	0.895966
GO:0005976	polysaccharide metabolic process	biological_process	metabolic process	3	95	306	9817	0.00980392	0.572558	0.895966
GO:0015318	inorganic molecular entity transmembrane transporter activity	molecular_function	transporter activity	5	183	489	17591	0.0102249	0.578266	0.900288
GO:0015630	microtubule cytoskeleton	cellular_component	cell	1	120	93	13066	0.0107527	0.577312	0.900288
GO:0051726	regulation of cell cycle	biological_process	biological regulation	1	95	88	9817	0.0113636	0.576654	0.900288
GO:0003774	motor activity	molecular_function	catalytic activity	1	183	83	17591	0.0120482	0.581055	0.902893
GO:0016874	ligase activity	molecular_function	catalytic activity	5	183	491	17591	0.0101833	0.581908	0.902893
GO:0009532	plastid stroma	cellular_component	organelle part	3	120	330	13066	0.00909091	0.587635	0.90313
GO:0015291	secondary active transmembrane transporter activity	molecular_function	transporter activity	2	183	190	17591	0.0105263	0.59046	0.90313
GO:0016773	phosphotransferase activity, alcohol group as acceptor	molecular_function	catalytic activity	15	183	1489	17591	0.0100739	0.590925	0.90313
GO:0035251	UDP-glucosyltransferase activity	molecular_function	catalytic activity	1	183	85	17591	0.0117647	0.589767	0.90313
GO:0044282	small molecule catabolic process	biological_process	metabolic process	1	95	91	9817	0.010989	0.588936	0.90313
GO:0046983	protein dimerization activity	molecular_function	binding	6	183	593	17591	0.010118	0.585143	0.90313
GO:0071944	cell periphery	cellular_component	cell	7	120	786	13066	0.00890585	0.588609	0.90313
GO:0071949	FAD binding	molecular_function	binding	1	183	84	17591	0.0119048	0.585434	0.90313
GO:1901565	organonitrogen compound catabolic process	biological_process	metabolic process	3	95	311	9817	0.0096463	0.583663	0.90313
GO:0051246	regulation of protein metabolic process	biological_process	biological regulation	1	95	92	9817	0.0108696	0.592951	0.904718
GO:0044281	small molecule metabolic process	biological_process	metabolic process	12	95	1283	9817	0.00935308	0.596799	0.909077
GO:0051082	unfolded protein binding	molecular_function	binding	1	183	87	17591	0.0114943	0.5983	0.909852
GO:0048285	organelle fission	biological_process	cellular component organization or biogenesis	1	95	94	9817	0.0106383	0.600865	0.91224
GO:0005216	ion channel activity	molecular_function	transporter activity	1	183	88	17591	0.0113636	0.602499	0.912387
GO:0006979	response to oxidative stress	biological_process	response to stimulus	2	95	210	9817	0.00952381	0.606931	0.912387
GO:0008017	microtubule binding	molecular_function	binding	1	183	89	17591	0.011236	0.606655	0.912387
GO:0016879	ligase activity, forming carbon-nitrogen bonds	molecular_function	catalytic activity	1	183	89	17591	0.011236	0.606655	0.912387
GO:0033692	cellular polysaccharide biosynthetic process	biological_process	cellular process	1	95	95	9817	0.0105263	0.604765	0.912387
GO:0051179	localization	biological_process	localization	12	95	1291	9817	0.00929512	0.605873	0.912387
GO:0009055	electron transfer activity	molecular_function	catalytic activity	3	183	301	17591	0.00996678	0.608926	0.913888
GO:0006720	isoprenoid metabolic process	biological_process	cellular process	1	95	97	9817	0.0103093	0.612452	0.916759
GO:0016831	carboxy-lyase activity	molecular_function	catalytic activity	1	183	91	17591	0.010989	0.614838	0.916759
GO:0034660	ncRNA metabolic process	biological_process	cellular process	2	95	213	9817	0.00938967	0.614705	0.916759
GO:0044238	primary metabolic process	biological_process	metabolic process	46	95	4846	9817	0.00949236	0.612973	0.916759
GO:0070011	peptidase activity, acting on L-amino acid peptides	molecular_function	catalytic activity	8	183	815	17591	0.00981595	0.617181	0.918757
GO:0016903	oxidoreductase activity, acting on the aldehyde or oxo group of donors	molecular_function	catalytic activity	1	183	93	17591	0.0107527	0.622852	0.925697
GO:0071555	cell wall organization	biological_process	cellular component organization or biogenesis	3	95	330	9817	0.00909091	0.624196	0.926194
GO:0043169	cation binding	molecular_function	binding	33	183	3300	17591	0.01	0.629666	0.932801
GO:0038023	signaling receptor activity	molecular_function	molecular transducer activity	1	183	95	17591	0.0105263	0.630699	0.932825
GO:0005886	plasma membrane	cellular_component	cell	5	120	592	13066	0.00844595	0.638914	0.933653
GO:0005911	cell-cell junction	cellular_component	cell junction	1	120	111	13066	0.00900901	0.642459	0.933653
GO:0009506	plasmodesma	cellular_component	symplast	1	120	111	13066	0.00900901	0.642459	0.933653
GO:0009653	anatomical structure morphogenesis	biological_process	developmental process	1	95	104	9817	0.00961538	0.638209	0.933653
GO:0030054	cell junction	cellular_component	cell junction	1	120	111	13066	0.00900901	0.642459	0.933653
GO:0034655	nucleobase-containing compound catabolic process	biological_process	cellular process	1	95	105	9817	0.00952381	0.641747	0.933653
GO:0042744	hydrogen peroxide catabolic process	biological_process	cellular process	1	95	105	9817	0.00952381	0.641747	0.933653
GO:0044085	cellular component biogenesis	biological_process	cellular component organization or biogenesis	5	95	559	9817	0.00894454	0.635899	0.933653
GO:0045229	external encapsulating structure organization	biological_process	cellular component organization or biogenesis	3	95	339	9817	0.00884956	0.64245	0.933653
GO:0048522	positive regulation of cellular process	biological_process	biological regulation	2	95	222	9817	0.00900901	0.63733	0.933653
GO:0055044	symplast	cellular_component	symplast	1	120	111	13066	0.00900901	0.642459	0.933653
GO:0060089	molecular transducer activity	molecular_function	molecular transducer activity	1	183	99	17591	0.010101	0.645911	0.937184
GO:0000287	magnesium ion binding	molecular_function	binding	2	183	212	17591	0.00943396	0.650056	0.937266
GO:0015631	tubulin binding	molecular_function	binding	1	183	100	17591	0.01	0.649615	0.937266
GO:0016301	kinase activity	molecular_function	catalytic activity	17	183	1744	17591	0.00974771	0.648293	0.937266
GO:0042743	hydrogen peroxide metabolic process	biological_process	cellular process	1	95	107	9817	0.00934579	0.648722	0.937266
GO:0005515	protein binding	molecular_function	binding	12	183	1252	17591	0.00958466	0.658	0.945605
GO:0017001	antibiotic catabolic process	biological_process	cellular process	1	95	110	9817	0.00909091	0.658933	0.945605
GO:0071702	organic substance transport	biological_process	localization	6	95	685	9817	0.00875912	0.65884	0.945605
GO:0000271	polysaccharide biosynthetic process	biological_process	metabolic process	1	95	111	9817	0.00900901	0.662271	0.94891
GO:0004175	endopeptidase activity	molecular_function	catalytic activity	4	183	434	17591	0.00921659	0.664716	0.950675
GO:0070647	protein modification by small protein conjugation or removal	biological_process	cellular process	1	95	112	9817	0.00892857	0.665577	0.950675
GO:0050896	response to stimulus	biological_process	response to stimulus	16	95	1783	9817	0.00897364	0.672434	0.958977
GO:0019843	rRNA binding	molecular_function	binding	1	183	107	17591	0.00934579	0.674489	0.960414
GO:0072593	reactive oxygen species metabolic process	biological_process	cellular process	1	95	116	9817	0.00862069	0.678482	0.964601
GO:0006810	transport	biological_process	localization	11	95	1253	9817	0.00877893	0.681877	0.966431
GO:0033993	response to lipid	biological_process	response to stimulus	1	95	117	9817	0.00854701	0.68163	0.966431
GO:0044430	cytoskeletal part	cellular_component	organelle part	1	120	124	13066	0.00806452	0.683218	0.966837
GO:0046872	metal ion binding	molecular_function	binding	32	183	3290	17591	0.00972644	0.693204	0.978114
GO:0051234	establishment of localization	biological_process	localization	11	95	1264	9817	0.00870253	0.69332	0.978114
GO:0008610	lipid biosynthetic process	biological_process	metabolic process	3	95	368	9817	0.00815217	0.69704	0.981852
GO:0051186	cofactor metabolic process	biological_process	cellular process	3	95	370	9817	0.00810811	0.700566	0.985305
GO:0034637	cellular carbohydrate biosynthetic process	biological_process	cellular process	1	95	125	9817	0.008	0.705745	0.991069
GO:0055085	transmembrane transport	biological_process	localization	3	95	374	9817	0.00802139	0.707527	0.992052
GO:0044270	cellular nitrogen compound catabolic process	biological_process	cellular process	1	95	126	9817	0.00793651	0.708629	0.992081
GO:0016757	transferase activity, transferring glycosyl groups	molecular_function	catalytic activity	6	183	678	17591	0.00884956	0.712465	0.992296
GO:0016787	hydrolase activity	molecular_function	catalytic activity	35	183	3613	17591	0.00968724	0.710691	0.992296
GO:0046700	heterocycle catabolic process	biological_process	cellular process	1	95	127	9817	0.00787402	0.711485	0.992296
GO:0140101	catalytic activity, acting on a tRNA	molecular_function	catalytic activity	1	183	119	17591	0.00840336	0.713112	0.992296
GO:0071704	organic substance metabolic process	biological_process	metabolic process	48	95	5193	9817	0.00924321	0.715537	0.994163
GO:0042254	ribosome biogenesis	biological_process	cellular component organization or biogenesis	1	95	130	9817	0.00769231	0.719889	0.998696
GO:0006399	tRNA metabolic process	biological_process	cellular process	1	95	131	9817	0.00763359	0.722636	0.999483
GO:0016830	carbon-carbon lyase activity	molecular_function	catalytic activity	1	183	122	17591	0.00819672	0.722032	0.999483
GO:0000166	nucleotide binding	molecular_function	binding	34	183	3832	17591	0.00887265	0.87531	0.999946
GO:0001101	response to acid chemical	biological_process	response to stimulus	1	95	185	9817	0.00540541	0.837347	0.999946
GO:0001882	nucleoside binding	molecular_function	binding	1	183	302	17591	0.00331126	0.958649	0.999946
GO:0001883	purine nucleoside binding	molecular_function	binding	1	183	278	17591	0.00359712	0.946627	0.999946
GO:0003676	nucleic acid binding	molecular_function	binding	26	183	3846	17591	0.00676027	0.99681	0.999946
GO:0003677	DNA binding	molecular_function	binding	17	183	2021	17591	0.00841168	0.855272	0.999946
GO:0003723	RNA binding	molecular_function	binding	5	183	1002	17591	0.00499002	0.980895	0.999946
GO:0003735	structural constituent of ribosome	molecular_function	structural molecule activity	2	183	500	17591	0.004	0.96815	0.999946
GO:0003924	GTPase activity	molecular_function	catalytic activity	1	183	189	17591	0.00529101	0.862917	0.999946
GO:0004252	serine-type endopeptidase activity	molecular_function	catalytic activity	1	183	168	17591	0.00595238	0.828865	0.999946
GO:0004601	peroxidase activity	molecular_function	antioxidant activity	1	183	148	17591	0.00675676	0.788653	0.999946
GO:0004842	ubiquitin-protein transferase activity	molecular_function	catalytic activity	1	183	193	17591	0.00518135	0.868593	0.999946
GO:0005198	structural molecule activity	molecular_function	structural molecule activity	5	183	613	17591	0.00815661	0.768631	0.999946
GO:0005215	transporter activity	molecular_function	transporter activity	10	183	1228	17591	0.00814332	0.829772	0.999946
GO:0005488	binding	molecular_function	binding	108	183	11029	17591	0.00979237	0.866595	0.999946
GO:0005524	ATP binding	molecular_function	binding	25	183	2830	17591	0.00883392	0.841325	0.999946
GO:0005525	GTP binding	molecular_function	binding	1	183	278	17591	0.00359712	0.946627	0.999946
GO:0005622	intracellular	cellular_component	cell	51	120	6676	13066	0.0076393	0.976477	0.999946
GO:0005623	cell	cellular_component	cell	54	120	7377	13066	0.00732005	0.99565	0.999946
GO:0005634	nucleus	cellular_component	cell	20	120	2680	13066	0.00746269	0.879148	0.999946
GO:0005737	cytoplasm	cellular_component	cell	27	120	3907	13066	0.00691067	0.97254	0.999946
GO:0005739	mitochondrion	cellular_component	cell	1	120	720	13066	0.00138889	0.998923	0.999946
GO:0005794	Golgi apparatus	cellular_component	cell	1	120	265	13066	0.00377358	0.915432	0.999946
GO:0005829	cytosol	cellular_component	cell	1	120	322	13066	0.00310559	0.950621	0.999946
GO:0005840	ribosome	cellular_component	cell	4	120	550	13066	0.00727273	0.749442	0.999946
GO:0005856	cytoskeleton	cellular_component	cell	1	120	148	13066	0.00675676	0.746733	0.999946
GO:0006139	nucleobase-containing compound metabolic process	biological_process	cellular process	8	95	1949	9817	0.00410467	0.999363	0.999946
GO:0006163	purine nucleotide metabolic process	biological_process	cellular process	1	95	289	9817	0.00346021	0.942303	0.999946
GO:0006259	DNA metabolic process	biological_process	cellular process	3	95	650	9817	0.00461538	0.955698	0.999946
GO:0006281	DNA repair	biological_process	cellular process	1	95	278	9817	0.00359712	0.935584	0.999946
GO:0006310	DNA recombination	biological_process	cellular process	1	95	181	9817	0.00552486	0.830771	0.999946
GO:0006355	regulation of transcription, DNA-templated	biological_process	biological regulation	5	95	805	9817	0.00621118	0.898873	0.999946
GO:0006396	RNA processing	biological_process	cellular process	2	95	467	9817	0.00428266	0.94478	0.999946
GO:0006412	translation	biological_process	cellular process	3	95	604	9817	0.00496689	0.937488	0.999946
GO:0006457	protein folding	biological_process	cellular process	1	95	132	9817	0.00757576	0.725356	0.999946
GO:0006464	cellular protein modification process	biological_process	cellular process	3	95	570	9817	0.00526316	0.919897	0.999946
GO:0006508	proteolysis	biological_process	metabolic process	1	95	224	9817	0.00446429	0.889581	0.999946
GO:0006511	ubiquitin-dependent protein catabolic process	biological_process	cellular process	1	95	158	9817	0.00632911	0.78752	0.999946
GO:0006518	peptide metabolic process	biological_process	cellular process	3	95	629	9817	0.00476948	0.948094	0.999946
GO:0006725	cellular aromatic compound metabolic process	biological_process	cellular process	9	95	2170	9817	0.00414747	0.999656	0.999946
GO:0006753	nucleoside phosphate metabolic process	biological_process	cellular process	2	95	390	9817	0.00512821	0.89634	0.999946
GO:0006793	phosphorus metabolic process	biological_process	cellular process	3	95	685	9817	0.00437956	0.966125	0.999946
GO:0006796	phosphate-containing compound metabolic process	biological_process	cellular process	3	95	675	9817	0.00444444	0.963406	0.999946
GO:0006807	nitrogen compound metabolic process	biological_process	metabolic process	20	95	3690	9817	0.00542005	0.999838	0.999946
GO:0006811	ion transport	biological_process	localization	1	95	311	9817	0.00321543	0.95373	0.999946
GO:0006974	cellular response to DNA damage stimulus	biological_process	cellular process	1	95	293	9817	0.00341297	0.944571	0.999946
GO:0006996	organelle organization	biological_process	cellular component organization or biogenesis	2	95	673	9817	0.00297177	0.99084	0.999946
GO:0007154	cell communication	biological_process	cellular process	4	95	601	9817	0.00665557	0.841509	0.999946
GO:0007165	signal transduction	biological_process	biological regulation	1	95	462	9817	0.0021645	0.989969	0.999946
GO:0008092	cytoskeletal protein binding	molecular_function	binding	1	183	189	17591	0.00529101	0.862917	0.999946
GO:0008104	protein localization	biological_process	localization	2	95	462	9817	0.004329	0.942428	0.999946
GO:0008144	drug binding	molecular_function	binding	28	183	3009	17591	0.00930542	0.770675	0.999946
GO:0008194	UDP-glycosyltransferase activity	molecular_function	catalytic activity	1	183	172	17591	0.00581395	0.835943	0.999946
GO:0008233	peptidase activity	molecular_function	catalytic activity	8	183	903	17591	0.00885936	0.728245	0.999946
GO:0008234	cysteine-type peptidase activity	molecular_function	catalytic activity	1	183	278	17591	0.00359712	0.946627	0.999946
GO:0008270	zinc ion binding	molecular_function	binding	9	183	1015	17591	0.008867	0.735409	0.999946
GO:0008324	cation transmembrane transporter activity	molecular_function	transporter activity	1	183	382	17591	0.0026178	0.982383	0.999946
GO:0008652	cellular amino acid biosynthetic process	biological_process	cellular process	1	95	162	9817	0.00617284	0.795758	0.999946
GO:0009056	catabolic process	biological_process	metabolic process	5	95	831	9817	0.00601685	0.913511	0.999946
GO:0009057	macromolecule catabolic process	biological_process	metabolic process	1	95	427	9817	0.00234192	0.985671	0.999946
GO:0009058	biosynthetic process	biological_process	metabolic process	12	95	2281	9817	0.00526085	0.996975	0.999946
GO:0009059	macromolecule biosynthetic process	biological_process	metabolic process	4	95	1231	9817	0.00324939	0.998531	0.999946
GO:0009117	nucleotide metabolic process	biological_process	cellular process	2	95	386	9817	0.00518135	0.892976	0.999946
GO:0009141	nucleoside triphosphate metabolic process	biological_process	cellular process	1	95	245	9817	0.00408163	0.910426	0.999946
GO:0009142	nucleoside triphosphate biosynthetic process	biological_process	cellular process	1	95	137	9817	0.00729927	0.738567	0.999946
GO:0009150	purine ribonucleotide metabolic process	biological_process	cellular process	1	95	287	9817	0.00348432	0.941136	0.999946
GO:0009165	nucleotide biosynthetic process	biological_process	cellular process	1	95	228	9817	0.00438596	0.893891	0.999946
GO:0009199	ribonucleoside triphosphate metabolic process	biological_process	cellular process	1	95	235	9817	0.00425532	0.901037	0.999946
GO:0009201	ribonucleoside triphosphate biosynthetic process	biological_process	cellular process	1	95	135	9817	0.00740741	0.73336	0.999946
GO:0009259	ribonucleotide metabolic process	biological_process	cellular process	2	95	302	9817	0.00662252	0.795123	0.999946
GO:0009260	ribonucleotide biosynthetic process	biological_process	cellular process	1	95	179	9817	0.00558659	0.827384	0.999946
GO:0009314	response to radiation	biological_process	response to stimulus	1	95	156	9817	0.00641026	0.783278	0.999946
GO:0009416	response to light stimulus	biological_process	response to stimulus	1	95	152	9817	0.00657895	0.774543	0.999946
GO:0009628	response to abiotic stimulus	biological_process	response to stimulus	2	95	379	9817	0.00527704	0.886848	0.999946
GO:0009719	response to endogenous stimulus	biological_process	response to stimulus	1	95	354	9817	0.00282486	0.969986	0.999946
GO:0009725	response to hormone	biological_process	response to stimulus	1	95	354	9817	0.00282486	0.969986	0.999946
GO:0009889	regulation of biosynthetic process	biological_process	biological regulation	5	95	878	9817	0.00569476	0.935369	0.999946
GO:0009987	cellular process	biological_process	cellular process	47	95	6641	9817	0.00707725	0.999925	0.999946
GO:0010033	response to organic substance	biological_process	response to stimulus	1	95	400	9817	0.0025	0.981152	0.999946
GO:0010035	response to inorganic substance	biological_process	response to stimulus	1	95	173	9817	0.00578035	0.816818	0.999946
GO:0010467	gene expression	biological_process	metabolic process	5	95	1366	9817	0.00366032	0.998167	0.999946
GO:0010468	regulation of gene expression	biological_process	biological regulation	5	95	1018	9817	0.00491159	0.974459	0.999946
GO:0010556	regulation of macromolecule biosynthetic process	biological_process	biological regulation	5	95	853	9817	0.00586166	0.924433	0.999946
GO:0012505	endomembrane system	cellular_component	cell	3	120	660	13066	0.00454545	0.945879	0.999946
GO:0015031	protein transport	biological_process	localization	1	95	440	9817	0.00227273	0.987447	0.999946
GO:0015074	DNA integration	biological_process	cellular process	1	95	251	9817	0.00398406	0.915631	0.999946
GO:0015075	ion transmembrane transporter activity	molecular_function	transporter activity	2	183	499	17591	0.00400802	0.967861	0.999946
GO:0015077	monovalent inorganic cation transmembrane transporter activity	molecular_function	transporter activity	1	183	258	17591	0.00387597	0.933997	0.999946
GO:0015078	proton transmembrane transporter activity	molecular_function	transporter activity	1	183	201	17591	0.00497512	0.879254	0.999946
GO:0015297	antiporter activity	molecular_function	transporter activity	1	183	138	17591	0.00724638	0.765153	0.999946
GO:0015399	primary active transmembrane transporter activity	molecular_function	transporter activity	1	183	202	17591	0.0049505	0.880525	0.999946
GO:0015405	P-P-bond-hydrolysis-driven transmembrane transporter activity	molecular_function	transporter activity	1	183	202	17591	0.0049505	0.880525	0.999946
GO:0015833	peptide transport	biological_process	localization	1	95	480	9817	0.00208333	0.991654	0.999946
GO:0015980	energy derivation by oxidation of organic compounds	biological_process	cellular process	1	95	175	9817	0.00571429	0.820409	0.999946
GO:0016043	cellular component organization	biological_process	cellular component organization or biogenesis	6	95	1270	9817	0.00472441	0.988147	0.999946
GO:0016051	carbohydrate biosynthetic process	biological_process	metabolic process	1	95	167	9817	0.00598802	0.805612	0.999946
GO:0016053	organic acid biosynthetic process	biological_process	cellular process	1	95	357	9817	0.00280112	0.970881	0.999946
GO:0016070	RNA metabolic process	biological_process	cellular process	3	95	863	9817	0.00347625	0.991962	0.999946
GO:0016192	vesicle-mediated transport	biological_process	localization	1	95	271	9817	0.00369004	0.930911	0.999946
GO:0016209	antioxidant activity	molecular_function	antioxidant activity	1	183	169	17591	0.00591716	0.830663	0.999946
GO:0016462	pyrophosphatase activity	molecular_function	catalytic activity	5	183	963	17591	0.00519211	0.974679	0.999946
GO:0016684	oxidoreductase activity, acting on peroxide as acceptor	molecular_function	catalytic activity	1	183	150	17591	0.00666667	0.793064	0.999946
GO:0016772	transferase activity, transferring phosphorus-containing groups	molecular_function	catalytic activity	17	183	2079	17591	0.00817701	0.883859	0.999946
GO:0016788	hydrolase activity, acting on ester bonds	molecular_function	catalytic activity	5	183	975	17591	0.00512821	0.976766	0.999946
GO:0016791	phosphatase activity	molecular_function	catalytic activity	1	183	249	17591	0.00401606	0.927383	0.999946
GO:0016817	hydrolase activity, acting on acid anhydrides	molecular_function	catalytic activity	5	183	979	17591	0.00510725	0.977426	0.999946
GO:0016818	hydrolase activity, acting on acid anhydrides, in phosphorus-containing anhydrides	molecular_function	catalytic activity	5	183	969	17591	0.00515996	0.975743	0.999946
GO:0016829	lyase activity	molecular_function	catalytic activity	3	183	389	17591	0.00771208	0.773462	0.999946
GO:0016835	carbon-oxygen lyase activity	molecular_function	catalytic activity	1	183	153	17591	0.00653595	0.79951	0.999946
GO:0016853	isomerase activity	molecular_function	catalytic activity	2	183	251	17591	0.00796813	0.738588	0.999946
GO:0016887	ATPase activity	molecular_function	catalytic activity	3	183	455	17591	0.00659341	0.855922	0.999946
GO:0016999	antibiotic metabolic process	biological_process	cellular process	1	95	172	9817	0.00581395	0.814996	0.999946
GO:0017076	purine nucleotide binding	molecular_function	binding	27	183	3471	17591	0.00777874	0.967283	0.999946
GO:0017111	nucleoside-triphosphatase activity	molecular_function	catalytic activity	5	183	929	17591	0.00538213	0.967786	0.999946
GO:0017144	drug metabolic process	biological_process	cellular process	1	95	628	9817	0.00159236	0.998185	0.999946
GO:0018130	heterocycle biosynthetic process	biological_process	cellular process	2	95	655	9817	0.00305344	0.989225	0.999946
GO:0019001	guanyl nucleotide binding	molecular_function	binding	1	183	278	17591	0.00359712	0.946627	0.999946
GO:0019219	regulation of nucleobase-containing compound metabolic process	biological_process	biological regulation	5	95	850	9817	0.00588235	0.923018	0.999946
GO:0019222	regulation of metabolic process	biological_process	biological regulation	6	95	1186	9817	0.00505902	0.978863	0.999946
GO:0019438	aromatic compound biosynthetic process	biological_process	cellular process	2	95	668	9817	0.00299401	0.990416	0.999946
GO:0019439	aromatic compound catabolic process	biological_process	cellular process	1	95	166	9817	0.0060241	0.80368	0.999946
GO:0019538	protein metabolic process	biological_process	metabolic process	8	95	1370	9817	0.00583942	0.964245	0.999946
GO:0019637	organophosphate metabolic process	biological_process	cellular process	3	95	576	9817	0.00520833	0.923294	0.999946
GO:0019693	ribose phosphate metabolic process	biological_process	cellular process	2	95	328	9817	0.00609756	0.831643	0.999946
GO:0019787	ubiquitin-like protein transferase activity	molecular_function	catalytic activity	1	183	204	17591	0.00490196	0.883026	0.999946
GO:0019941	modification-dependent protein catabolic process	biological_process	cellular process	1	95	165	9817	0.00606061	0.801728	0.999946
GO:0022607	cellular component assembly	biological_process	cellular component organization or biogenesis	2	95	394	9817	0.00507614	0.899607	0.999946
GO:0022613	ribonucleoprotein complex biogenesis	biological_process	cellular component organization or biogenesis	1	95	185	9817	0.00540541	0.837347	0.999946
GO:0022804	active transmembrane transporter activity	molecular_function	transporter activity	3	183	393	17591	0.00763359	0.779383	0.999946
GO:0022857	transmembrane transporter activity	molecular_function	transporter activity	8	183	1135	17591	0.00704846	0.910318	0.999946
GO:0022890	inorganic cation transmembrane transporter activity	molecular_function	transporter activity	1	183	354	17591	0.00282486	0.976242	0.999946
GO:0023052	signaling	biological_process	signaling	1	95	466	9817	0.00214592	0.99037	0.999946
GO:0030163	protein catabolic process	biological_process	metabolic process	1	95	209	9817	0.00478469	0.871819	0.999946
GO:0030554	adenyl nucleotide binding	molecular_function	binding	26	183	3195	17591	0.00813772	0.935739	0.999946
GO:0031090	organelle membrane	cellular_component	organelle part	1	120	554	13066	0.00180505	0.994611	0.999946
GO:0031323	regulation of cellular metabolic process	biological_process	biological regulation	6	95	998	9817	0.00601202	0.930478	0.999946
GO:0031326	regulation of cellular biosynthetic process	biological_process	biological regulation	5	95	877	9817	0.00570125	0.93496	0.999946
GO:0031974	membrane-enclosed lumen	cellular_component	membrane-enclosed lumen	1	120	344	13066	0.00290698	0.959907	0.999946
GO:0031981	nuclear lumen	cellular_component	organelle part	1	120	268	13066	0.00373134	0.917788	0.999946
GO:0032549	ribonucleoside binding	molecular_function	binding	1	183	301	17591	0.00332226	0.958206	0.999946
GO:0032550	purine ribonucleoside binding	molecular_function	binding	1	183	278	17591	0.00359712	0.946627	0.999946
GO:0032553	ribonucleotide binding	molecular_function	binding	27	183	3502	17591	0.00770988	0.971299	0.999946
GO:0032555	purine ribonucleotide binding	molecular_function	binding	27	183	3465	17591	0.00779221	0.966452	0.999946
GO:0032559	adenyl ribonucleotide binding	molecular_function	binding	26	183	3190	17591	0.00815047	0.934509	0.999946
GO:0032561	guanyl ribonucleotide binding	molecular_function	binding	1	183	278	17591	0.00359712	0.946627	0.999946
GO:0032787	monocarboxylic acid metabolic process	biological_process	cellular process	1	95	263	9817	0.00380228	0.925159	0.999946
GO:0032991	protein-containing complex	cellular_component	protein-containing complex	15	120	2024	13066	0.00741107	0.850818	0.999946
GO:0033554	cellular response to stress	biological_process	cellular process	2	95	395	9817	0.00506329	0.900408	0.999946
GO:0034470	ncRNA processing	biological_process	cellular process	1	95	147	9817	0.00680272	0.763131	0.999946
GO:0034613	cellular protein localization	biological_process	localization	1	95	305	9817	0.00327869	0.950857	0.999946
GO:0034622	cellular protein-containing complex assembly	biological_process	cellular component organization or biogenesis	1	95	272	9817	0.00367647	0.931599	0.999946
GO:0034641	cellular nitrogen compound metabolic process	biological_process	cellular process	11	95	2676	9817	0.00411061	0.999946	0.999946
GO:0034645	cellular macromolecule biosynthetic process	biological_process	cellular process	4	95	1210	9817	0.00330579	0.998243	0.999946
GO:0034654	nucleobase-containing compound biosynthetic process	biological_process	cellular process	2	95	540	9817	0.0037037	0.970297	0.999946
GO:0035556	intracellular signal transduction	biological_process	biological regulation	1	95	150	9817	0.00666667	0.770045	0.999946
GO:0035639	purine ribonucleoside triphosphate binding	molecular_function	binding	26	183	3106	17591	0.0083709	0.910821	0.999946
GO:0036094	small molecule binding	molecular_function	binding	37	183	4056	17591	0.00912229	0.842597	0.999946
GO:0036211	protein modification process	biological_process	metabolic process	3	95	570	9817	0.00526316	0.919897	0.999946
GO:0042221	response to chemical	biological_process	response to stimulus	2	95	553	9817	0.00361664	0.973456	0.999946
GO:0042578	phosphoric ester hydrolase activity	molecular_function	catalytic activity	1	183	301	17591	0.00332226	0.958206	0.999946
GO:0042623	ATPase activity, coupled	molecular_function	catalytic activity	2	183	300	17591	0.00666667	0.822216	0.999946
GO:0042626	ATPase activity, coupled to transmembrane movement of substances	molecular_function	transporter activity	1	183	191	17591	0.0052356	0.865785	0.999946
GO:0042737	drug catabolic process	biological_process	cellular process	1	95	240	9817	0.00416667	0.905847	0.999946
GO:0042886	amide transport	biological_process	localization	1	95	481	9817	0.002079	0.991739	0.999946
GO:0043043	peptide biosynthetic process	biological_process	cellular process	3	95	606	9817	0.0049505	0.938404	0.999946
GO:0043167	ion binding	molecular_function	binding	67	183	6825	17591	0.00981685	0.752768	0.999946
GO:0043168	anion binding	molecular_function	binding	36	183	4023	17591	0.00894855	0.870474	0.999946
GO:0043170	macromolecule metabolic process	biological_process	metabolic process	16	95	3083	9817	0.00518975	0.999611	0.999946
GO:0043226	organelle	cellular_component	organelle	44	120	5878	13066	0.00748554	0.974111	0.999946
GO:0043227	membrane-bounded organelle	cellular_component	organelle	39	120	5282	13066	0.00738357	0.970579	0.999946
GO:0043228	non-membrane-bounded organelle	cellular_component	organelle	6	120	1037	13066	0.00578592	0.922236	0.999946
GO:0043229	intracellular organelle	cellular_component	cell	44	120	5872	13066	0.00749319	0.973498	0.999946
GO:0043231	intracellular membrane-bounded organelle	cellular_component	cell	38	120	5205	13066	0.00730067	0.974514	0.999946
GO:0043232	intracellular non-membrane-bounded organelle	cellular_component	cell	6	120	1037	13066	0.00578592	0.922236	0.999946
GO:0043233	organelle lumen	cellular_component	organelle part	1	120	344	13066	0.00290698	0.959907	0.999946
GO:0043412	macromolecule modification	biological_process	metabolic process	4	95	669	9817	0.00597907	0.895867	0.999946
GO:0043492	ATPase activity, coupled to movement of substances	molecular_function	catalytic activity	1	183	220	17591	0.00454545	0.901251	0.999946
GO:0043531	ADP binding	molecular_function	binding	1	183	369	17591	0.00271003	0.979758	0.999946
GO:0043603	cellular amide metabolic process	biological_process	cellular process	5	95	720	9817	0.00694444	0.835674	0.999946
GO:0043604	amide biosynthetic process	biological_process	cellular process	3	95	646	9817	0.00464396	0.954334	0.999946
GO:0043632	modification-dependent macromolecule catabolic process	biological_process	cellular process	1	95	166	9817	0.0060241	0.80368	0.999946
GO:0043933	protein-containing complex subunit organization	biological_process	cellular component organization or biogenesis	1	95	326	9817	0.00306748	0.960206	0.999946
GO:0044237	cellular metabolic process	biological_process	cellular process	37	95	4819	9817	0.00767794	0.982056	0.999946
GO:0044248	cellular catabolic process	biological_process	cellular process	4	95	712	9817	0.00561798	0.921224	0.999946
GO:0044249	cellular biosynthetic process	biological_process	cellular process	11	95	2089	9817	0.00526568	0.995426	0.999946
GO:0044255	cellular lipid metabolic process	biological_process	cellular process	3	95	443	9817	0.00677201	0.809015	0.999946
GO:0044257	cellular protein catabolic process	biological_process	cellular process	1	95	188	9817	0.00531915	0.842113	0.999946
GO:0044260	cellular macromolecule metabolic process	biological_process	cellular process	12	95	2458	9817	0.00488202	0.999124	0.999946
GO:0044265	cellular macromolecule catabolic process	biological_process	cellular process	1	95	241	9817	0.00414938	0.906781	0.999946
GO:0044267	cellular protein metabolic process	biological_process	cellular process	6	95	1309	9817	0.00458365	0.991018	0.999946
GO:0044271	cellular nitrogen compound biosynthetic process	biological_process	cellular process	5	95	1260	9817	0.00396825	0.995727	0.999946
GO:0044283	small molecule biosynthetic process	biological_process	metabolic process	3	95	477	9817	0.00628931	0.847166	0.999946
GO:0044422	organelle part	cellular_component	organelle part	14	120	2472	13066	0.00566343	0.988265	0.999946
GO:0044424	intracellular part	cellular_component	cell	51	120	6675	13066	0.00764045	0.976383	0.999946
GO:0044428	nuclear part	cellular_component	organelle part	2	120	623	13066	0.00321027	0.980451	0.999946
GO:0044431	Golgi apparatus part	cellular_component	organelle part	1	120	179	13066	0.00558659	0.810424	0.999946
GO:0044444	cytoplasmic part	cellular_component	cell	24	120	3414	13066	0.00702988	0.952757	0.999946
GO:0044446	intracellular organelle part	cellular_component	organelle part	14	120	2470	13066	0.00566802	0.98814	0.999946
GO:0044464	cell part	cellular_component	cell	54	120	7171	13066	0.00753033	0.988458	0.999946
GO:0045184	establishment of protein localization	biological_process	localization	1	95	445	9817	0.00224719	0.98807	0.999946
GO:0046390	ribose phosphate biosynthetic process	biological_process	cellular process	1	95	179	9817	0.00558659	0.827384	0.999946
GO:0046394	carboxylic acid biosynthetic process	biological_process	cellular process	1	95	357	9817	0.00280112	0.970881	0.999946
GO:0046483	heterocycle metabolic process	biological_process	cellular process	9	95	2107	9817	0.00427148	0.999434	0.999946
GO:0046907	intracellular transport	biological_process	localization	1	95	328	9817	0.00304878	0.960998	0.999946
GO:0048518	positive regulation of biological process	biological_process	biological regulation	2	95	283	9817	0.00706714	0.764231	0.999946
GO:0050789	regulation of biological process	biological_process	biological regulation	12	95	1997	9817	0.00600901	0.982152	0.999946
GO:0050794	regulation of cellular process	biological_process	biological regulation	8	95	1685	9817	0.00474777	0.995397	0.999946
GO:0051171	regulation of nitrogen compound metabolic process	biological_process	biological regulation	6	95	941	9817	0.0063762	0.903349	0.999946
GO:0051252	regulation of RNA metabolic process	biological_process	biological regulation	5	95	817	9817	0.00611995	0.905872	0.999946
GO:0051276	chromosome organization	biological_process	cellular component organization or biogenesis	1	95	274	9817	0.00364964	0.932954	0.999946
GO:0051603	proteolysis involved in cellular protein catabolic process	biological_process	cellular process	1	95	185	9817	0.00540541	0.837347	0.999946
GO:0051641	cellular localization	biological_process	localization	2	95	387	9817	0.00516796	0.893827	0.999946
GO:0051649	establishment of localization in cell	biological_process	localization	1	95	339	9817	0.00294985	0.965087	0.999946
GO:0051716	cellular response to stimulus	biological_process	cellular process	3	95	880	9817	0.00340909	0.993034	0.999946
GO:0055086	nucleobase-containing small molecule metabolic process	biological_process	cellular process	2	95	454	9817	0.00440529	0.938469	0.999946
GO:0060255	regulation of macromolecule metabolic process	biological_process	biological regulation	6	95	1116	9817	0.00537634	0.966488	0.999946
GO:0065003	protein-containing complex assembly	biological_process	cellular component organization or biogenesis	1	95	306	9817	0.00326797	0.951348	0.999946
GO:0065007	biological regulation	biological_process	biological regulation	14	95	2241	9817	0.00624721	0.981916	0.999946
GO:0065008	regulation of biological quality	biological_process	biological regulation	3	95	454	9817	0.00660793	0.822147	0.999946
GO:0070013	intracellular organelle lumen	cellular_component	organelle part	1	120	344	13066	0.00290698	0.959907	0.999946
GO:0070727	cellular macromolecule localization	biological_process	localization	1	95	308	9817	0.00324675	0.952315	0.999946
GO:0071554	cell wall organization or biogenesis	biological_process	cellular process	3	95	405	9817	0.00740741	0.757374	0.999946
GO:0071705	nitrogen compound transport	biological_process	localization	1	95	513	9817	0.00194932	0.994048	0.999946
GO:0071840	cellular component organization or biogenesis	biological_process	cellular component organization or biogenesis	7	95	1385	9817	0.00505415	0.985965	0.999946
GO:0072521	purine-containing compound metabolic process	biological_process	cellular process	1	95	316	9817	0.00316456	0.955997	0.999946
GO:0080090	regulation of primary metabolic process	biological_process	biological regulation	6	95	963	9817	0.00623053	0.91473	0.999946
GO:0090304	nucleic acid metabolic process	biological_process	cellular process	6	95	1498	9817	0.00400534	0.997826	0.999946
GO:0090407	organophosphate biosynthetic process	biological_process	cellular process	1	95	338	9817	0.00295858	0.964733	0.999946
GO:0097159	organic cyclic compound binding	molecular_function	binding	68	183	7960	17591	0.00854271	0.989272	0.999946
GO:0097367	carbohydrate derivative binding	molecular_function	binding	28	183	3563	17591	0.00785855	0.965119	0.999946
GO:0098588	bounding membrane of organelle	cellular_component	organelle part	1	120	295	13066	0.00338983	0.936268	0.999946
GO:0098772	molecular function regulator	molecular_function	molecular function regulator	1	183	347	17591	0.00288184	0.974399	0.999946
GO:0098791	Golgi subcompartment	cellular_component	organelle part	1	120	153	13066	0.00653595	0.758281	0.999946
GO:0098805	whole membrane	cellular_component	membrane	1	120	207	13066	0.00483092	0.854152	0.999946
GO:0099402	plant organ development	biological_process	multicellular organismal process	1	95	145	9817	0.00689655	0.758409	0.999946
GO:0140096	catalytic activity, acting on a protein	molecular_function	catalytic activity	25	183	2816	17591	0.00887784	0.834243	0.999946
GO:0140098	catalytic activity, acting on RNA	molecular_function	catalytic activity	3	183	527	17591	0.0056926	0.914917	0.999946
GO:1901135	carbohydrate derivative metabolic process	biological_process	metabolic process	3	95	632	9817	0.00474684	0.949249	0.999946
GO:1901137	carbohydrate derivative biosynthetic process	biological_process	metabolic process	1	95	377	9817	0.00265252	0.976209	0.999946
GO:1901265	nucleoside phosphate binding	molecular_function	binding	34	183	3832	17591	0.00887265	0.87531	0.999946
GO:1901293	nucleoside phosphate biosynthetic process	biological_process	cellular process	1	95	230	9817	0.00434783	0.895983	0.999946
GO:1901360	organic cyclic compound metabolic process	biological_process	metabolic process	9	95	2225	9817	0.00404494	0.999779	0.999946
GO:1901361	organic cyclic compound catabolic process	biological_process	metabolic process	1	95	173	9817	0.00578035	0.816818	0.999946
GO:1901362	organic cyclic compound biosynthetic process	biological_process	metabolic process	2	95	742	9817	0.00269542	0.995124	0.999946
GO:1901363	heterocyclic compound binding	molecular_function	binding	68	183	7959	17591	0.00854379	0.989228	0.999946
GO:1901564	organonitrogen compound metabolic process	biological_process	metabolic process	15	95	2262	9817	0.0066313	0.96926	0.999946
GO:1901566	organonitrogen compound biosynthetic process	biological_process	metabolic process	5	95	1264	9817	0.0039557	0.995859	0.999946
GO:1901575	organic substance catabolic process	biological_process	metabolic process	4	95	693	9817	0.00577201	0.910778	0.999946
GO:1901576	organic substance biosynthetic process	biological_process	metabolic process	11	95	2175	9817	0.00505747	0.997445	0.999946
GO:1901700	response to oxygen-containing compound	biological_process	response to stimulus	2	95	262	9817	0.00763359	0.725539	0.999946
GO:1903506	regulation of nucleic acid-templated transcription	biological_process	biological regulation	5	95	805	9817	0.00621118	0.898873	0.999946
GO:1990904	ribonucleoprotein complex	cellular_component	protein-containing complex	4	120	698	13066	0.00573066	0.889606	0.999946
GO:2000112	regulation of cellular macromolecule biosynthetic process	biological_process	biological regulation	5	95	853	9817	0.00586166	0.924433	0.999946
GO:2001141	regulation of RNA biosynthetic process	biological_process	biological regulation	5	95	805	9817	0.00621118	0.898873	0.999946

## Sheet: 289 methDEGs
Gene ID	GO Term	Level 2	Level 1
Solyc00g174330.2	[P]GO:0009607//response to biotic stimulus;GO:0006950//response to stress;GO:0006952//defense response;GO:0050896//response to stimulus;[C]GO:0005576//extracellular region;GO:0005615//extracellular space;GO:0044421//extracellular region part;	[C]extracellular region;[P]response to stimulus;	cellular_component;biological_process
Solyc00g174340.1	[P]GO:0006950//response to stress;GO:0050896//response to stimulus;GO:0006952//defense response;GO:0009607//response to biotic stimulus;[C]GO:0005615//extracellular space;GO:0005576//extracellular region;GO:0044421//extracellular region part;	[C]extracellular region;[P]response to stimulus;	biological_process;cellular_component
Solyc01g005000.2	[P]GO:1901564//organonitrogen compound metabolic process;GO:0071704//organic substance metabolic process;GO:0006082//organic acid metabolic process;GO:0044281//small molecule metabolic process;GO:0009056//catabolic process;GO:0006807//nitrogen compound metabolic process;GO:0006536//glutamate metabolic process;GO:0044237//cellular metabolic process;GO:0043649//dicarboxylic acid catabolic process;G…	[C]cell;[P]cellular process;metabolic process;[F]catalytic activity;binding;	biological_process;molecular_function;cellular_component
Solyc01g005280.2
Solyc01g006430.2	[P]GO:0008152//metabolic process;GO:0044238//primary metabolic process;GO:0071704//organic substance metabolic process;GO:0006629//lipid metabolic process;[C]GO:0044425//membrane part;GO:0016020//membrane;GO:0016021//integral component of membrane;GO:0031224//intrinsic component of membrane;[F]GO:0016705//oxidoreductase activity, acting on paired donors, with incorporation or reduction of molecul…	[C]membrane part;membrane;[P]metabolic process;[F]catalytic activity;	molecular_function;biological_process;cellular_component
Solyc01g007960.2	[C]GO:0016021//integral component of membrane;GO:0044425//membrane part;GO:0016020//membrane;GO:0031224//intrinsic component of membrane;[F]GO:0017076//purine nucleotide binding;GO:0097159//organic cyclic compound binding;GO:1901265//nucleoside phosphate binding;GO:0004672//protein kinase activity;GO:0016772//transferase activity, transferring phosphorus-containing groups;GO:0005524//ATP binding;…	[C]membrane part;membrane;[F]binding;catalytic activity;	cellular_component;molecular_function
Solyc01g008030.2
Solyc01g008130.2
Solyc01g008300.1	[F]GO:0016740//transferase activity;GO:0003824//catalytic activity;GO:0016747//transferase activity, transferring acyl groups other than amino-acyl groups;GO:0016746//transferase activity, transferring acyl groups;	[F]catalytic activity;	molecular_function
Solyc01g008500.2
Solyc01g008620.2	[P]GO:0006950//response to stress;GO:0005975//carbohydrate metabolic process;GO:0044238//primary metabolic process;GO:0008152//metabolic process;GO:0050896//response to stimulus;GO:0071704//organic substance metabolic process;GO:0006952//defense response;[C]GO:0046658//anchored component of plasma membrane;GO:0044459//plasma membrane part;GO:0005576//extracellular region;GO:0005886//plasma membra…	[C]extracellular region;cell;membrane part;membrane;[P]response to stimulus;metabolic process;[F]catalytic activity;	cellular_component;molecular_function;biological_process
Solyc01g009220.2	[C]GO:0016020//membrane;GO:0031224//intrinsic component of membrane;GO:0016021//integral component of membrane;GO:0044425//membrane part;	[C]membrane part;membrane;	cellular_component
Solyc01g009700.1	[C]GO:0016020//membrane;GO:0016021//integral component of membrane;GO:0044425//membrane part;GO:0031224//intrinsic component of membrane;	[C]membrane;membrane part;	cellular_component
Solyc01g056850.2	[P]GO:0006793//phosphorus metabolic process;GO:0006221//pyrimidine nucleotide biosynthetic process;GO:1901657//glycosyl compound metabolic process;GO:0042455//ribonucleoside biosynthetic process;GO:0044271//cellular nitrogen compound biosynthetic process;GO:0019752//carboxylic acid metabolic process;GO:0006807//nitrogen compound metabolic process;GO:0009117//nucleotide metabolic process;GO:003465…	[P]metabolic process;cellular process;[F]catalytic activity;binding;	biological_process;molecular_function
Solyc01g057000.2
Solyc01g058250.1	[F]GO:0043169//cation binding;GO:0046872//metal ion binding;GO:0016491//oxidoreductase activity;GO:0043167//ion binding;GO:0005488//binding;GO:0003824//catalytic activity;	[F]binding;catalytic activity;	molecular_function
Solyc01g060020.2	[P]GO:0008152//metabolic process;GO:0006950//response to stress;GO:0044238//primary metabolic process;GO:0071704//organic substance metabolic process;GO:0005975//carbohydrate metabolic process;GO:0050896//response to stimulus;GO:0006952//defense response;[C]GO:0005886//plasma membrane;GO:0031224//intrinsic component of membrane;GO:0005623//cell;GO:0044459//plasma membrane part;GO:0031226//intrins…	[C]organelle;membrane part;membrane;cell;[P]response to stimulus;metabolic process;[F]catalytic activity;	cellular_component;biological_process;molecular_function
Solyc01g066040.2
Solyc01g066450.2	[F]GO:0016787//hydrolase activity;GO:0003824//catalytic activity;	[F]catalytic activity;	molecular_function
Solyc01g067510.2	[C]GO:0031224//intrinsic component of membrane;GO:0016021//integral component of membrane;GO:0016020//membrane;GO:0044425//membrane part;[F]GO:0004672//protein kinase activity;GO:0005488//binding;GO:1901265//nucleoside phosphate binding;GO:0005524//ATP binding;GO:0043167//ion binding;GO:0016740//transferase activity;GO:0008144//drug binding;GO:0043168//anion binding;GO:0016772//transferase activi…	[C]membrane;membrane part;[F]catalytic activity;binding;	molecular_function;cellular_component
Solyc01g067620.2	[F]GO:0043167//ion binding;GO:0016491//oxidoreductase activity;GO:0005488//binding;GO:0046872//metal ion binding;GO:0043169//cation binding;GO:0003824//catalytic activity;	[F]binding;catalytic activity;	molecular_function
Solyc01g068540.2	[F]GO:0003677//DNA binding;GO:1901363//heterocyclic compound binding;GO:0005488//binding;GO:0003676//nucleic acid binding;GO:0097159//organic cyclic compound binding;	[F]binding;	molecular_function
Solyc01g080010.2	[F]GO:0003824//catalytic activity;GO:0004190//aspartic-type endopeptidase activity;GO:0140096//catalytic activity, acting on a protein;GO:0016787//hydrolase activity;GO:0004175//endopeptidase activity;GO:0070001//aspartic-type peptidase activity;GO:0070011//peptidase activity, acting on L-amino acid peptides;GO:0008233//peptidase activity;	[F]catalytic activity;	molecular_function
Solyc01g080810.2	[P]GO:1901360//organic cyclic compound metabolic process;GO:0044281//small molecule metabolic process;GO:0006807//nitrogen compound metabolic process;GO:0019538//protein metabolic process;GO:0006412//translation;GO:0010467//gene expression;GO:0006139//nucleobase-containing compound metabolic process;GO:0043039//tRNA aminoacylation;GO:0046483//heterocycle metabolic process;GO:0044267//cellular pro…	[P]cellular process;metabolic process;[F]binding;catalytic activity;	molecular_function;biological_process
Solyc01g086900.2	[P]GO:0006139//nucleobase-containing compound metabolic process;GO:0006725//cellular aromatic compound metabolic process;GO:0006807//nitrogen compound metabolic process;GO:1901360//organic cyclic compound metabolic process;GO:0010467//gene expression;GO:0006396//RNA processing;GO:0071704//organic substance metabolic process;GO:0009987//cellular process;GO:0034641//cellular nitrogen compound metab…	[P]metabolic process;cellular process;[F]binding;catalytic activity;	molecular_function;biological_process
Solyc01g091800.2	[F]GO:0097159//organic cyclic compound binding;GO:0008173//RNA methyltransferase activity;GO:0005488//binding;GO:0003676//nucleic acid binding;GO:0008757//S-adenosylmethionine-dependent methyltransferase activity;GO:1901363//heterocyclic compound binding;GO:0016740//transferase activity;GO:0008168//methyltransferase activity;GO:0140102//catalytic activity, acting on a rRNA;GO:0000179//rRNA (adeni…	[F]binding;catalytic activity;	molecular_function
Solyc01g095720.2	[P]GO:0008152//metabolic process;GO:0071704//organic substance metabolic process;GO:0006629//lipid metabolic process;GO:0044238//primary metabolic process;[F]GO:0016787//hydrolase activity;GO:0003824//catalytic activity;	[P]metabolic process;[F]catalytic activity;	biological_process;molecular_function
Solyc01g098740.2	[C]GO:0044425//membrane part;GO:0016020//membrane;GO:0016021//integral component of membrane;GO:0031224//intrinsic component of membrane;[F]GO:0097159//organic cyclic compound binding;GO:1901363//heterocyclic compound binding;GO:0004672//protein kinase activity;GO:0097367//carbohydrate derivative binding;GO:0032555//purine ribonucleotide binding;GO:0030554//adenyl nucleotide binding;GO:0003824//c…	[C]membrane part;membrane;[F]binding;catalytic activity;	cellular_component;molecular_function
Solyc01g099630.2	[P]GO:0009987//cellular process;GO:0042546//cell wall biogenesis;GO:0043170//macromolecule metabolic process;GO:0044237//cellular metabolic process;GO:0045229//external encapsulating structure organization;GO:0044042//glucan metabolic process;GO:0010383//cell wall polysaccharide metabolic process;GO:0044262//cellular carbohydrate metabolic process;GO:0071840//cellular component organization or bi…	[C]membrane part;extracellular region;membrane;cell;[P]cellular component organization or biogenesis;cellular process;metabolic process;[F]catalytic activity;	biological_process;molecular_function;cellular_component
Solyc01g100530.2	[P]GO:0051179//localization;GO:0072657//protein localization to membrane;GO:1990778//protein localization to cell periphery;GO:0033036//macromolecule localization;GO:0051641//cellular localization;GO:0072659//protein localization to plasma membrane;GO:0008104//protein localization;GO:0034613//cellular protein localization;GO:0070727//cellular macromolecule localization;	[P]localization;	biological_process
Solyc01g102950.2
Solyc01g105310.2	[F]GO:0003824//catalytic activity;GO:0016787//hydrolase activity;	[F]catalytic activity;	molecular_function
Solyc01g105450.2	[C]GO:0016020//membrane;GO:0044425//membrane part;GO:0031224//intrinsic component of membrane;GO:0016021//integral component of membrane;[F]GO:0097367//carbohydrate derivative binding;GO:0032555//purine ribonucleotide binding;GO:0016818//hydrolase activity, acting on acid anhydrides, in phosphorus-containing anhydrides;GO:0032559//adenyl ribonucleotide binding;GO:1901265//nucleoside phosphate bin…	[C]membrane part;membrane;[F]catalytic activity;binding;	cellular_component;molecular_function
Solyc01g105920.2	[F]GO:0000287//magnesium ion binding;GO:0043169//cation binding;GO:0016829//lyase activity;GO:0003824//catalytic activity;GO:0046872//metal ion binding;GO:0043167//ion binding;GO:0016838//carbon-oxygen lyase activity, acting on phosphates;GO:0005488//binding;GO:0010333//terpene synthase activity;GO:0016835//carbon-oxygen lyase activity;	[F]binding;catalytic activity;	molecular_function
Solyc01g107340.2	[F]GO:0005198//structural molecule activity;GO:0005199//structural constituent of cell wall;	[F]structural molecule activity;	molecular_function
Solyc01g108560.2	[F]GO:0003824//catalytic activity;GO:0016787//hydrolase activity;	[F]catalytic activity;	molecular_function
Solyc01g109720.2	[F]GO:0003824//catalytic activity;	[F]catalytic activity;	molecular_function
Solyc02g014830.2	[F]GO:0008238//exopeptidase activity;GO:0016787//hydrolase activity;GO:0017171//serine hydrolase activity;GO:0008233//peptidase activity;GO:0004185//serine-type carboxypeptidase activity;GO:0008236//serine-type peptidase activity;GO:0140096//catalytic activity, acting on a protein;GO:0070008//serine-type exopeptidase activity;GO:0003824//catalytic activity;GO:0070011//peptidase activity, acting o…	[F]catalytic activity;	molecular_function
Solyc02g030480.2	[F]GO:0016491//oxidoreductase activity;GO:0046914//transition metal ion binding;GO:0043167//ion binding;GO:0046872//metal ion binding;GO:0043169//cation binding;GO:0005488//binding;GO:0008270//zinc ion binding;GO:0003824//catalytic activity;	[F]catalytic activity;binding;	molecular_function
Solyc02g031790.1	[C]GO:0044425//membrane part;GO:0016020//membrane;GO:0016021//integral component of membrane;GO:0031224//intrinsic component of membrane;[F]GO:0003824//catalytic activity;GO:0016772//transferase activity, transferring phosphorus-containing groups;GO:0032555//purine ribonucleotide binding;GO:1901363//heterocyclic compound binding;GO:0036094//small molecule binding;GO:0016740//transferase activity;…	[C]membrane part;membrane;[F]binding;catalytic activity;	cellular_component;molecular_function
Solyc02g032940.2	[P]GO:0044238//primary metabolic process;GO:0071704//organic substance metabolic process;GO:0006629//lipid metabolic process;GO:0008152//metabolic process;[F]GO:0016787//hydrolase activity;GO:0004190//aspartic-type endopeptidase activity;GO:0008233//peptidase activity;GO:0004175//endopeptidase activity;GO:0140096//catalytic activity, acting on a protein;GO:0003824//catalytic activity;GO:0070001//…	[P]metabolic process;[F]catalytic activity;	biological_process;molecular_function
Solyc02g037550.2	[P]GO:0051234//establishment of localization;GO:0006810//transport;GO:0051179//localization;GO:0055085//transmembrane transport;[C]GO:0016021//integral component of membrane;GO:0016020//membrane;GO:0031224//intrinsic component of membrane;GO:0044425//membrane part;	[C]membrane;membrane part;[P]localization;	biological_process;cellular_component
Solyc02g063180.2	[F]GO:1901265//nucleoside phosphate binding;GO:0005488//binding;GO:0003824//catalytic activity;GO:0000166//nucleotide binding;GO:0071949//FAD binding;GO:0050660//flavin adenine dinucleotide binding;GO:0050662//coenzyme binding;GO:0008762//UDP-N-acetylmuramate dehydrogenase activity;GO:0043167//ion binding;GO:0016616//oxidoreductase activity, acting on the CH-OH group of donors, NAD or NADP as acc…	[F]catalytic activity;binding;	molecular_function
Solyc02g067350.2
Solyc02g068060.2	[C]GO:0044425//membrane part;GO:0016020//membrane;GO:0031224//intrinsic component of membrane;GO:0016021//integral component of membrane;[F]GO:0030554//adenyl nucleotide binding;GO:0097367//carbohydrate derivative binding;GO:0016772//transferase activity, transferring phosphorus-containing groups;GO:0016740//transferase activity;GO:0036094//small molecule binding;GO:0032555//purine ribonucleotide…	[C]membrane;membrane part;[F]binding;catalytic activity;	molecular_function;cellular_component
Solyc02g068250.2
Solyc02g069410.2	[C]GO:0044446//intracellular organelle part;GO:0009536//plastid;GO:0043229//intracellular organelle;GO:0009507//chloroplast;GO:0005737//cytoplasm;GO:0005623//cell;GO:0043226//organelle;GO:0009570//chloroplast stroma;GO:0005622//intracellular;GO:0043227//membrane-bounded organelle;GO:0043231//intracellular membrane-bounded organelle;GO:0044424//intracellular part;GO:0044444//cytoplasmic part;GO:00…	[C]organelle;organelle part;cell;[F]catalytic activity;	molecular_function;cellular_component
Solyc02g071060.2	[C]GO:0016021//integral component of membrane;GO:0044425//membrane part;GO:0016020//membrane;GO:0031224//intrinsic component of membrane;[F]GO:0005215//transporter activity;	[C]membrane part;membrane;[F]transporter activity;	cellular_component;molecular_function
Solyc02g071360.2	[F]GO:0046872//metal ion binding;GO:0051213//dioxygenase activity;GO:0005488//binding;GO:0003824//catalytic activity;GO:0016491//oxidoreductase activity;GO:0043169//cation binding;GO:0043167//ion binding;	[F]catalytic activity;binding;	molecular_function
Solyc02g071800.2
Solyc02g077080.2
Solyc02g077110.2	[P]GO:0071704//organic substance metabolic process;GO:0044238//primary metabolic process;GO:0008152//metabolic process;GO:0006629//lipid metabolic process;[F]GO:0003824//catalytic activity;GO:0016788//hydrolase activity, acting on ester bonds;GO:0016298//lipase activity;GO:0004620//phospholipase activity;GO:0008970//phospholipase A1 activity;GO:0052689//carboxylic ester hydrolase activity;GO:0016…	[P]metabolic process;[F]catalytic activity;	biological_process;molecular_function
Solyc02g078760.1
Solyc02g080890.2	[C]GO:0005622//intracellular;GO:0005623//cell;GO:0043231//intracellular membrane-bounded organelle;GO:0043227//membrane-bounded organelle;GO:0005634//nucleus;GO:0043226//organelle;GO:0044424//intracellular part;GO:0043229//intracellular organelle;GO:0044464//cell part;[F]GO:0097159//organic cyclic compound binding;GO:0003676//nucleic acid binding;GO:0003700//DNA-binding transcription factor activ…	[C]cell;organelle;[F]transcription regulator activity;binding;	cellular_component;molecular_function
Solyc02g081800.1	[F]GO:0003824//catalytic activity;GO:0016746//transferase activity, transferring acyl groups;GO:0016747//transferase activity, transferring acyl groups other than amino-acyl groups;GO:0016740//transferase activity;	[F]catalytic activity;	molecular_function
Solyc02g081900.2	[F]GO:0043167//ion binding;GO:0046914//transition metal ion binding;GO:0046872//metal ion binding;GO:0008270//zinc ion binding;GO:0005488//binding;GO:0043169//cation binding;	[F]binding;	molecular_function
Solyc02g081980.2	[C]GO:0044425//membrane part;GO:0016020//membrane;GO:0031224//intrinsic component of membrane;GO:0016021//integral component of membrane;[F]GO:0016787//hydrolase activity;GO:0003824//catalytic activity;	[C]membrane part;membrane;[F]catalytic activity;	molecular_function;cellular_component
Solyc02g083810.2	[P]GO:0042742//defense response to bacterium;GO:0009605//response to external stimulus;GO:0043207//response to external biotic stimulus;GO:0051707//response to other organism;GO:0006952//defense response;GO:0009617//response to bacterium;GO:0008152//metabolic process;GO:0051704//multi-organism process;GO:0044237//cellular metabolic process;GO:0009607//response to biotic stimulus;GO:0006950//respo…	[C]extracellular region;cell;organelle part;membrane;organelle;[P]cellular process;multi-organism process;response to stimulus;metabolic process;[F]binding;catalytic activity;	molecular_function;biological_process;cellular_component
Solyc02g084280.2	[C]GO:0005634//nucleus;GO:0005643//nuclear pore;GO:0043226//organelle;GO:0044422//organelle part;GO:0005635//nuclear envelope;GO:0005622//intracellular;GO:0044424//intracellular part;GO:0043227//membrane-bounded organelle;GO:0031967//organelle envelope;GO:0005623//cell;GO:0032991//protein-containing complex;GO:0031975//envelope;GO:0043229//intracellular organelle;GO:0044428//nuclear part;GO:00444…	[C]organelle part;cell;organelle;protein-containing complex;[F]structural molecule activity;	molecular_function;cellular_component
Solyc02g085480.2	[C]GO:0016021//integral component of membrane;GO:0044425//membrane part;GO:0031224//intrinsic component of membrane;GO:0016020//membrane;	[C]membrane part;membrane;	cellular_component
Solyc02g085600.1	[P]GO:0065007//biological regulation;GO:0048831//regulation of shoot system development;GO:0030154//cell differentiation;GO:0050789//regulation of biological process;GO:0032502//developmental process;GO:0051239//regulation of multicellular organismal process;GO:0048869//cellular developmental process;GO:0009987//cellular process;GO:0050793//regulation of developmental process;GO:2000026//regulati…	[C]organelle;cell;[P]developmental process;biological regulation;cellular process;[F]binding;transcription regulator activity;	cellular_component;biological_process;molecular_function
Solyc02g089490.2	[P]GO:0006996//organelle organization;GO:0016043//cellular component organization;GO:0048831//regulation of shoot system development;GO:0009987//cellular process;GO:0050789//regulation of biological process;GO:0009657//plastid organization;GO:2000026//regulation of multicellular organismal development;GO:0009909//regulation of flower development;GO:0009658//chloroplast organization;GO:0048580//re…	[C]organelle;cell;[P]cellular component organization or biogenesis;biological regulation;cellular process;[F]binding;	biological_process;molecular_function;cellular_component
Solyc02g089520.1	[C]GO:0005634//nucleus;GO:0044464//cell part;GO:0043231//intracellular membrane-bounded organelle;GO:0043227//membrane-bounded organelle;GO:0005622//intracellular;GO:0043226//organelle;GO:0043229//intracellular organelle;GO:0044424//intracellular part;GO:0005623//cell;[F]GO:0046872//metal ion binding;GO:0008270//zinc ion binding;GO:0043167//ion binding;GO:0005488//binding;GO:0046914//transition m…	[C]organelle;cell;[F]binding;	molecular_function;cellular_component
Solyc02g089640.2	[C]GO:0044425//membrane part;GO:0044431//Golgi apparatus part;GO:0031984//organelle subcompartment;GO:0044422//organelle part;GO:0097708//intracellular vesicle;GO:0098791//Golgi subcompartment;GO:0071944//cell periphery;GO:0016020//membrane;GO:0031410//cytoplasmic vesicle;GO:0016021//integral component of membrane;GO:0005622//intracellular;GO:0005794//Golgi apparatus;GO:0005737//cytoplasm;GO:0005…	[C]cell;membrane part;membrane;organelle part;organelle;[F]catalytic activity;binding;	cellular_component;molecular_function
Solyc02g090350.2	[C]GO:0031224//intrinsic component of membrane;GO:0016020//membrane;GO:0016021//integral component of membrane;GO:0044425//membrane part;[F]GO:0005506//iron ion binding;GO:0016705//oxidoreductase activity, acting on paired donors, with incorporation or reduction of molecular oxygen;GO:1901363//heterocyclic compound binding;GO:0097159//organic cyclic compound binding;GO:0016491//oxidoreductase act…	[C]membrane;membrane part;[F]catalytic activity;binding;	cellular_component;molecular_function
Solyc02g091470.2	[F]GO:1901265//nucleoside phosphate binding;GO:0016740//transferase activity;GO:0005488//binding;GO:0003824//catalytic activity;GO:0043168//anion binding;GO:0097159//organic cyclic compound binding;GO:0000166//nucleotide binding;GO:0032553//ribonucleotide binding;GO:0008144//drug binding;GO:0032555//purine ribonucleotide binding;GO:0036094//small molecule binding;GO:0097367//carbohydrate derivati…	[F]catalytic activity;binding;	molecular_function
Solyc02g092420.2	[F]GO:0003824//catalytic activity;GO:0140096//catalytic activity, acting on a protein;GO:0016853//isomerase activity;GO:0016859//cis-trans isomerase activity;GO:0003755//peptidyl-prolyl cis-trans isomerase activity;	[F]catalytic activity;	molecular_function
Solyc02g093180.2	[F]GO:0016746//transferase activity, transferring acyl groups;GO:0016747//transferase activity, transferring acyl groups other than amino-acyl groups;GO:0003824//catalytic activity;GO:0016740//transferase activity;	[F]catalytic activity;	molecular_function
Solyc02g093590.2	[C]GO:0043231//intracellular membrane-bounded organelle;GO:0044464//cell part;GO:0044424//intracellular part;GO:0043229//intracellular organelle;GO:0043227//membrane-bounded organelle;GO:0043226//organelle;GO:0005623//cell;GO:0005634//nucleus;GO:0005622//intracellular;	[C]cell;organelle;	cellular_component
Solyc03g006250.2	[F]GO:0003824//catalytic activity;GO:0016788//hydrolase activity, acting on ester bonds;GO:0016787//hydrolase activity;	[F]catalytic activity;	molecular_function
Solyc03g006830.2	[P]GO:0048522//positive regulation of cellular process;GO:0050794//regulation of cellular process;GO:0045935//positive regulation of nucleobase-containing compound metabolic process;GO:0019219//regulation of nucleobase-containing compound metabolic process;GO:2000112//regulation of cellular macromolecule biosynthetic process;GO:0031325//positive regulation of cellular metabolic process;GO:0010468…	[C]cell;organelle;[P]biological regulation;[F]transcription regulator activity;binding;	molecular_function;biological_process;cellular_component
Solyc03g013340.2	[C]GO:0016020//membrane;GO:0031224//intrinsic component of membrane;GO:0044425//membrane part;GO:0016021//integral component of membrane;[F]GO:0005215//transporter activity;GO:0022857//transmembrane transporter activity;GO:0015267//channel activity;GO:0022803//passive transmembrane transporter activity;	[C]membrane;membrane part;[F]transporter activity;	cellular_component;molecular_function
Solyc03g019660.2
Solyc03g025350.2	[P]GO:0055085//transmembrane transport;GO:0051234//establishment of localization;GO:0006810//transport;GO:0051179//localization;[C]GO:0016021//integral component of membrane;GO:0016020//membrane;GO:0031224//intrinsic component of membrane;GO:0044425//membrane part;	[C]membrane part;membrane;[P]localization;	cellular_component;biological_process
Solyc03g025410.2
Solyc03g025680.2
Solyc03g026120.2	[C]GO:0031224//intrinsic component of membrane;GO:0016020//membrane;GO:0016021//integral component of membrane;GO:0044425//membrane part;[F]GO:0008168//methyltransferase activity;GO:0016740//transferase activity;GO:0003824//catalytic activity;GO:0016741//transferase activity, transferring one-carbon groups;	[C]membrane part;membrane;[F]catalytic activity;	molecular_function;cellular_component
Solyc03g033750.1	[C]GO:0044425//membrane part;GO:0016021//integral component of membrane;GO:0016020//membrane;GO:0031224//intrinsic component of membrane;	[C]membrane;membrane part;	cellular_component
Solyc03g033790.2	[F]GO:0032559//adenyl ribonucleotide binding;GO:0008144//drug binding;GO:1901363//heterocyclic compound binding;GO:1901265//nucleoside phosphate binding;GO:0017076//purine nucleotide binding;GO:0005524//ATP binding;GO:0097159//organic cyclic compound binding;GO:0036094//small molecule binding;GO:0043168//anion binding;GO:0035639//purine ribonucleoside triphosphate binding;GO:0032555//purine ribon…	[F]binding;	molecular_function
Solyc03g034320.2	[P]GO:0043436//oxoacid metabolic process;GO:0008152//metabolic process;GO:0009987//cellular process;GO:0044238//primary metabolic process;GO:0009064//glutamine family amino acid metabolic process;GO:1901564//organonitrogen compound metabolic process;GO:1901605//alpha-amino acid metabolic process;GO:0019752//carboxylic acid metabolic process;GO:0006807//nitrogen compound metabolic process;GO:00060…	[P]cellular process;metabolic process;[F]catalytic activity;	molecular_function;biological_process
Solyc03g034370.1	[P]GO:0010876//lipid localization;GO:0051234//establishment of localization;GO:0051179//localization;GO:0033036//macromolecule localization;GO:0006869//lipid transport;GO:0006810//transport;GO:0071702//organic substance transport;	[P]localization;	biological_process
Solyc03g083050.2
Solyc03g083100.2
Solyc03g094120.2	[C]GO:0016020//membrane;GO:0016021//integral component of membrane;GO:0044425//membrane part;GO:0031224//intrinsic component of membrane;	[C]membrane;membrane part;	cellular_component
Solyc03g096850.2	[C]GO:0055035//plastid thylakoid membrane;GO:0016021//integral component of membrane;GO:0009535//chloroplast thylakoid membrane;GO:0044435//plastid part;GO:0044444//cytoplasmic part;GO:0044446//intracellular organelle part;GO:0044434//chloroplast part;GO:0044464//cell part;GO:0009507//chloroplast;GO:0031224//intrinsic component of membrane;GO:0044422//organelle part;GO:0043227//membrane-bounded o…	[C]membrane;organelle;cell;membrane part;organelle part;[F]binding;	molecular_function;cellular_component
Solyc03g110930.2	[P]GO:0008152//metabolic process;GO:0071704//organic substance metabolic process;GO:0009987//cellular process;GO:0006518//peptide metabolic process;GO:0044237//cellular metabolic process;GO:0043603//cellular amide metabolic process;GO:0044238//primary metabolic process;GO:0044260//cellular macromolecule metabolic process;GO:0044271//cellular nitrogen compound biosynthetic process;GO:0044249//cell…	[C]cell;protein-containing complex;organelle;[P]metabolic process;cellular process;[F]structural molecule activity;	cellular_component;molecular_function;biological_process
Solyc03g112930.2	[P]GO:0031326//regulation of cellular biosynthetic process;GO:0080090//regulation of primary metabolic process;GO:0010468//regulation of gene expression;GO:0051171//regulation of nitrogen compound metabolic process;GO:1903506//regulation of nucleic acid-templated transcription;GO:0051252//regulation of RNA metabolic process;GO:0031323//regulation of cellular metabolic process;GO:0060255//regulati…	[C]organelle;cell;[P]biological regulation;[F]binding;	cellular_component;molecular_function;biological_process
Solyc03g113280.2	[C]GO:0031224//intrinsic component of membrane;GO:0016021//integral component of membrane;GO:0044425//membrane part;GO:0016020//membrane;	[C]membrane part;membrane;	cellular_component
Solyc03g114930.2	[P]GO:0015979//photosynthesis;GO:0044237//cellular metabolic process;GO:0008152//metabolic process;GO:0009987//cellular process;[C]GO:0005623//cell;GO:0009507//chloroplast;GO:0009521//photosystem;GO:0044436//thylakoid part;GO:0009579//thylakoid;GO:1990204//oxidoreductase complex;GO:0042651//thylakoid membrane;GO:0016020//membrane;GO:0044425//membrane part;GO:0098796//membrane protein complex;GO:0…	[C]organelle;membrane part;protein-containing complex;membrane;cell;[P]metabolic process;cellular process;[F]binding;	cellular_component;biological_process;molecular_function
Solyc03g115120.1	[F]GO:1901363//heterocyclic compound binding;GO:0043167//ion binding;GO:0008270//zinc ion binding;GO:0005488//binding;GO:0046914//transition metal ion binding;GO:0046872//metal ion binding;GO:0003676//nucleic acid binding;GO:0097159//organic cyclic compound binding;GO:0043169//cation binding;	[F]binding;	molecular_function
Solyc03g119590.1	[P]GO:0050789//regulation of biological process;GO:0043900//regulation of multi-organism process;GO:0048583//regulation of response to stimulus;GO:0045088//regulation of innate immune response;GO:0002831//regulation of response to biotic stimulus;GO:0065007//biological regulation;GO:0032101//regulation of response to external stimulus;GO:0031347//regulation of defense response;GO:0002682//regulat…	[P]biological regulation;	biological_process
Solyc03g121720.2	[F]GO:0003824//catalytic activity;GO:1901265//nucleoside phosphate binding;GO:0036094//small molecule binding;GO:0005488//binding;GO:0097159//organic cyclic compound binding;GO:0048037//cofactor binding;GO:0016491//oxidoreductase activity;GO:0050661//NADP binding;GO:1901363//heterocyclic compound binding;GO:0051287//NAD binding;GO:0050662//coenzyme binding;GO:0000166//nucleotide binding;	[F]binding;catalytic activity;	molecular_function
Solyc04g005250.2	[P]GO:0044238//primary metabolic process;GO:0090304//nucleic acid metabolic process;GO:0006304//DNA modification;GO:0008152//metabolic process;GO:0006259//DNA metabolic process;GO:0032259//methylation;GO:0006807//nitrogen compound metabolic process;GO:0044728//DNA methylation or demethylation;GO:0006139//nucleobase-containing compound metabolic process;GO:0043412//macromolecule modification;GO:00…	[P]cellular process;metabolic process;[F]catalytic activity;	molecular_function;biological_process
Solyc04g005560.2	[P]GO:0010015//root morphogenesis;GO:0048856//anatomical structure development;GO:0007049//cell cycle;GO:0000278//mitotic cell cycle;GO:0016192//vesicle-mediated transport;GO:0009798//axis specification;GO:0007275//multicellular organism development;GO:0048765//root hair cell differentiation;GO:0051641//cellular localization;GO:0032989//cellular component morphogenesis;GO:0048528//post-embryonic …	[C]organelle;membrane;cell;[P]response to stimulus;growth;developmental process;cellular process;reproduction;reproductive process;multicellular organismal process;biological regulation;cellular component organization or biogenesis;biological adhesion;localization;[F]molecular function regulator;binding;	cellular_component;biological_process;molecular_function
Solyc04g009420.2	[P]GO:0015979//photosynthesis;GO:0009987//cellular process;GO:0044237//cellular metabolic process;GO:0008152//metabolic process;[C]GO:0044464//cell part;GO:0005622//intracellular;GO:0009579//thylakoid;GO:0042651//thylakoid membrane;GO:0009521//photosystem;GO:0009654//photosystem II oxygen evolving complex;GO:0044425//membrane part;GO:0032991//protein-containing complex;GO:0044436//thylakoid part;…	[C]membrane;cell;protein-containing complex;membrane part;[P]metabolic process;cellular process;[F]binding;	cellular_component;biological_process;molecular_function
Solyc04g012190.1	[C]GO:0016021//integral component of membrane;GO:0031224//intrinsic component of membrane;GO:0016020//membrane;GO:0044425//membrane part;[F]GO:0005488//binding;GO:0032559//adenyl ribonucleotide binding;GO:0004672//protein kinase activity;GO:0017076//purine nucleotide binding;GO:0030554//adenyl nucleotide binding;GO:0008144//drug binding;GO:0016773//phosphotransferase activity, alcohol group as ac…	[C]membrane;membrane part;[F]catalytic activity;binding;	molecular_function;cellular_component
Solyc04g014400.2	[C]GO:0016021//integral component of membrane;GO:0016020//membrane;GO:0031224//intrinsic component of membrane;GO:0044425//membrane part;[F]GO:0016740//transferase activity;GO:0016772//transferase activity, transferring phosphorus-containing groups;GO:0003824//catalytic activity;GO:0016301//kinase activity;	[C]membrane part;membrane;[F]catalytic activity;	molecular_function;cellular_component
Solyc04g015120.2
Solyc04g015460.2	[C]GO:0016020//membrane;GO:0031224//intrinsic component of membrane;GO:0044425//membrane part;GO:0016021//integral component of membrane;[F]GO:0017076//purine nucleotide binding;GO:0016301//kinase activity;GO:0035639//purine ribonucleoside triphosphate binding;GO:0005524//ATP binding;GO:1901265//nucleoside phosphate binding;GO:0004674//protein serine/threonine kinase activity;GO:1901363//heterocy…	[C]membrane;membrane part;[F]catalytic activity;binding;	molecular_function;cellular_component
Solyc04g017620.2
Solyc04g040120.1	[P]GO:0071704//organic substance metabolic process;GO:0008152//metabolic process;GO:0044238//primary metabolic process;GO:0006629//lipid metabolic process;[C]GO:0016021//integral component of membrane;GO:0031224//intrinsic component of membrane;GO:0044425//membrane part;GO:0016020//membrane;[F]GO:0016491//oxidoreductase activity;GO:0003824//catalytic activity;GO:0016717//oxidoreductase activity, …	[C]membrane part;membrane;[P]metabolic process;[F]catalytic activity;	cellular_component;biological_process;molecular_function
Solyc04g040180.2	[F]GO:0016740//transferase activity;GO:0008168//methyltransferase activity;GO:0016741//transferase activity, transferring one-carbon groups;GO:0003824//catalytic activity;	[F]catalytic activity;	molecular_function
Solyc04g049710.2
Solyc04g064940.2	[C]GO:0031224//intrinsic component of membrane;GO:0016021//integral component of membrane;GO:0044425//membrane part;GO:0016020//membrane;[F]GO:1901265//nucleoside phosphate binding;GO:0035639//purine ribonucleoside triphosphate binding;GO:0016740//transferase activity;GO:0097159//organic cyclic compound binding;GO:0005488//binding;GO:0005524//ATP binding;GO:0140096//catalytic activity, acting on …	[C]membrane part;membrane;[F]binding;catalytic activity;	cellular_component;molecular_function
Solyc04g072460.2
Solyc04g073950.1
Solyc04g079690.2	[F]GO:0016773//phosphotransferase activity, alcohol group as acceptor;GO:0016740//transferase activity;GO:0097159//organic cyclic compound binding;GO:0004713//protein tyrosine kinase activity;GO:0097367//carbohydrate derivative binding;GO:0032555//purine ribonucleotide binding;GO:0036094//small molecule binding;GO:0016301//kinase activity;GO:0035639//purine ribonucleoside triphosphate binding;GO:…	[F]catalytic activity;binding;	molecular_function
Solyc04g079960.1	[P]GO:0006720//isoprenoid metabolic process;GO:0006629//lipid metabolic process;GO:0009987//cellular process;GO:0044238//primary metabolic process;GO:1901576//organic substance biosynthetic process;GO:0009058//biosynthetic process;GO:0008299//isoprenoid biosynthetic process;GO:0044249//cellular biosynthetic process;GO:0044255//cellular lipid metabolic process;GO:0071704//organic substance metabol…	[P]metabolic process;cellular process;[F]catalytic activity;	biological_process;molecular_function
Solyc04g080380.2	[C]GO:0044425//membrane part;GO:0031224//intrinsic component of membrane;GO:0016021//integral component of membrane;GO:0016020//membrane;[F]GO:0003824//catalytic activity;GO:0003880//protein C-terminal carboxyl O-methyltransferase activity;GO:0016740//transferase activity;GO:0008276//protein methyltransferase activity;GO:0016741//transferase activity, transferring one-carbon groups;GO:0010340//ca…	[C]membrane part;membrane;[F]catalytic activity;	molecular_function;cellular_component
Solyc04g080420.2	[F]GO:0030246//carbohydrate binding;GO:0005488//binding;	[F]binding;	molecular_function
Solyc04g080660.2	[P]GO:0019752//carboxylic acid metabolic process;GO:0032787//monocarboxylic acid metabolic process;GO:0006950//response to stress;GO:0043436//oxoacid metabolic process;GO:0009694//jasmonic acid metabolic process;GO:0065007//biological regulation;GO:0065008//regulation of biological quality;GO:0071704//organic substance metabolic process;GO:0010817//regulation of hormone levels;GO:0050896//respons…	[P]response to stimulus;cellular process;biological regulation;metabolic process;[F]catalytic activity;	biological_process;molecular_function
Solyc04g081630.1	[P]GO:0006457//protein folding;GO:0009987//cellular process;[F]GO:0043167//ion binding;GO:0005524//ATP binding;GO:0005488//binding;GO:0030554//adenyl nucleotide binding;GO:0036094//small molecule binding;GO:0032559//adenyl ribonucleotide binding;GO:0097159//organic cyclic compound binding;GO:0017076//purine nucleotide binding;GO:0005515//protein binding;GO:0051082//unfolded protein binding;GO:000…	[P]cellular process;[F]binding;	molecular_function;biological_process
Solyc04g082830.2	[P]GO:0051234//establishment of localization;GO:0055085//transmembrane transport;GO:0006810//transport;GO:0051179//localization;[C]GO:0031224//intrinsic component of membrane;GO:0016021//integral component of membrane;GO:0044425//membrane part;GO:0016020//membrane;	[C]membrane part;membrane;[P]localization;	cellular_component;biological_process
Solyc05g007300.2	[C]GO:0016021//integral component of membrane;GO:0044425//membrane part;GO:0031224//intrinsic component of membrane;GO:0016020//membrane;	[C]membrane part;membrane;	cellular_component
Solyc05g008120.2
Solyc05g008820.2	[C]GO:0044425//membrane part;GO:0031224//intrinsic component of membrane;GO:0016020//membrane;GO:0016021//integral component of membrane;	[C]membrane;membrane part;	cellular_component
Solyc05g009470.2	[P]GO:0044238//primary metabolic process;GO:0071704//organic substance metabolic process;GO:0005975//carbohydrate metabolic process;GO:0008152//metabolic process;[F]GO:0004558//alpha-1,4-glucosidase activity;GO:0004553//hydrolase activity, hydrolyzing O-glycosyl compounds;GO:0032450//maltose alpha-glucosidase activity;GO:0003824//catalytic activity;GO:0015926//glucosidase activity;GO:0030246//car…	[P]metabolic process;[F]binding;catalytic activity;	molecular_function;biological_process
Solyc05g009890.1	[F]GO:0070011//peptidase activity, acting on L-amino acid peptides;GO:0003824//catalytic activity;GO:0008233//peptidase activity;GO:0070001//aspartic-type peptidase activity;GO:0140096//catalytic activity, acting on a protein;GO:0004190//aspartic-type endopeptidase activity;GO:0016787//hydrolase activity;GO:0004175//endopeptidase activity;	[F]catalytic activity;	molecular_function
Solyc05g010470.2	[P]GO:0009987//cellular process;GO:0071840//cellular component organization or biogenesis;GO:0034470//ncRNA processing;GO:0010467//gene expression;GO:0071704//organic substance metabolic process;GO:0006364//rRNA processing;GO:0044238//primary metabolic process;GO:0016072//rRNA metabolic process;GO:0044085//cellular component biogenesis;GO:0090304//nucleic acid metabolic process;GO:0042254//riboso…	[C]organelle part;cell;organelle;membrane-enclosed lumen;[P]metabolic process;cellular component organization or biogenesis;cellular process;	cellular_component;biological_process
Solyc05g012780.2
Solyc05g026490.2	[P]GO:0044238//primary metabolic process;GO:0008152//metabolic process;GO:0005975//carbohydrate metabolic process;GO:0071704//organic substance metabolic process;[F]GO:0016866//intramolecular transferase activity;GO:0003824//catalytic activity;GO:0016868//intramolecular transferase activity, phosphotransferases;GO:0016853//isomerase activity;	[P]metabolic process;[F]catalytic activity;	biological_process;molecular_function
Solyc05g043330.2	[F]GO:0016788//hydrolase activity, acting on ester bonds;GO:0016787//hydrolase activity;GO:0003824//catalytic activity;	[F]catalytic activity;	molecular_function
Solyc05g050770.2	[F]GO:0003824//catalytic activity;GO:0008236//serine-type peptidase activity;GO:0017171//serine hydrolase activity;GO:0004185//serine-type carboxypeptidase activity;GO:0008238//exopeptidase activity;GO:0070008//serine-type exopeptidase activity;GO:0070011//peptidase activity, acting on L-amino acid peptides;GO:0004180//carboxypeptidase activity;GO:0016787//hydrolase activity;GO:0008233//peptidase…	[F]catalytic activity;	molecular_function
Solyc05g051860.2
Solyc05g052280.2	[P]GO:0009056//catabolic process;GO:0050896//response to stimulus;GO:0042737//drug catabolic process;GO:0072593//reactive oxygen species metabolic process;GO:0042743//hydrogen peroxide metabolic process;GO:0009987//cellular process;GO:0042744//hydrogen peroxide catabolic process;GO:0051187//cofactor catabolic process;GO:0017144//drug metabolic process;GO:0044237//cellular metabolic process;GO:000…	[C]extracellular region;[P]cellular process;metabolic process;response to stimulus;[F]binding;antioxidant activity;catalytic activity;	molecular_function;cellular_component;biological_process
Solyc05g053330.2	[C]GO:0005623//cell;GO:0044464//cell part;GO:0005622//intracellular;GO:0043229//intracellular organelle;GO:0005634//nucleus;GO:0043227//membrane-bounded organelle;GO:0044424//intracellular part;GO:0043231//intracellular membrane-bounded organelle;GO:0043226//organelle;[F]GO:0003677//DNA binding;GO:0005488//binding;GO:1901363//heterocyclic compound binding;GO:0003676//nucleic acid binding;GO:00971…	[C]organelle;cell;[F]binding;	molecular_function;cellular_component
Solyc05g053380.2	[C]GO:0005634//nucleus;GO:0043231//intracellular membrane-bounded organelle;GO:0044464//cell part;GO:0043226//organelle;GO:0044424//intracellular part;GO:0043229//intracellular organelle;GO:0043227//membrane-bounded organelle;GO:0005622//intracellular;GO:0005623//cell;[F]GO:0005488//binding;GO:0003677//DNA binding;GO:0043565//sequence-specific DNA binding;GO:0003676//nucleic acid binding;GO:00971…	[C]cell;organelle;[F]binding;transcription regulator activity;	cellular_component;molecular_function
Solyc05g054030.2	[F]GO:0005488//binding;GO:1901363//heterocyclic compound binding;GO:0003676//nucleic acid binding;GO:0097159//organic cyclic compound binding;	[F]binding;	molecular_function
Solyc05g054320.2	[F]GO:0016787//hydrolase activity;GO:0003824//catalytic activity;	[F]catalytic activity;	molecular_function
Solyc05g055200.2	[P]GO:0043170//macromolecule metabolic process;GO:0071704//organic substance metabolic process;GO:0019538//protein metabolic process;GO:0006807//nitrogen compound metabolic process;GO:0008152//metabolic process;GO:1901564//organonitrogen compound metabolic process;GO:0044238//primary metabolic process;	[P]metabolic process;	biological_process
Solyc06g005680.2	[C]GO:0043229//intracellular organelle;GO:0043231//intracellular membrane-bounded organelle;GO:0043226//organelle;GO:0043227//membrane-bounded organelle;GO:0044464//cell part;GO:0005622//intracellular;GO:0044424//intracellular part;GO:0005634//nucleus;GO:0005623//cell;[F]GO:0097159//organic cyclic compound binding;GO:0003677//DNA binding;GO:1901363//heterocyclic compound binding;GO:0003676//nucle…	[C]organelle;cell;[F]binding;	cellular_component;molecular_function
Solyc06g005710.2
Solyc06g006020.1
Solyc06g007130.2	[P]GO:0006629//lipid metabolic process;GO:0071704//organic substance metabolic process;GO:0044238//primary metabolic process;GO:0008152//metabolic process;[C]GO:0031224//intrinsic component of membrane;GO:0016021//integral component of membrane;GO:0044425//membrane part;GO:0016020//membrane;[F]GO:0016717//oxidoreductase activity, acting on paired donors, with oxidation of a pair of donors resulti…	[C]membrane;membrane part;[P]metabolic process;[F]catalytic activity;	cellular_component;biological_process;molecular_function
Solyc06g007960.2	[F]GO:0016741//transferase activity, transferring one-carbon groups;GO:0005515//protein binding;GO:0008171//O-methyltransferase activity;GO:0003824//catalytic activity;GO:0008168//methyltransferase activity;GO:0046983//protein dimerization activity;GO:0016740//transferase activity;GO:0005488//binding;	[F]catalytic activity;binding;	molecular_function
Solyc06g008360.2	[P]GO:0009889//regulation of biosynthetic process;GO:0065007//biological regulation;GO:0050794//regulation of cellular process;GO:2000112//regulation of cellular macromolecule biosynthetic process;GO:0019222//regulation of metabolic process;GO:0010468//regulation of gene expression;GO:1903506//regulation of nucleic acid-templated transcription;GO:0080090//regulation of primary metabolic process;G…	[C]organelle;cell;[P]biological regulation;[F]binding;	molecular_function;cellular_component;biological_process
Solyc06g009670.2
Solyc06g011350.2	[P]GO:0010035//response to inorganic substance;GO:1901700//response to oxygen-containing compound;GO:0006950//response to stress;GO:0009628//response to abiotic stimulus;GO:0009414//response to water deprivation;GO:0009415//response to water;GO:0050896//response to stimulus;GO:0042221//response to chemical;GO:0001101//response to acid chemical;[C]GO:0005886//plasma membrane;GO:0043226//organelle;…	[C]symplast;membrane;organelle;membrane part;cell;cell junction;[P]response to stimulus;[F]transporter activity;	biological_process;cellular_component;molecular_function
Solyc06g030470.2
Solyc06g033850.2	[C]GO:0044464//cell part;GO:0043226//organelle;GO:0043229//intracellular organelle;GO:0043227//membrane-bounded organelle;GO:0005634//nucleus;GO:0043231//intracellular membrane-bounded organelle;GO:0005622//intracellular;GO:0044424//intracellular part;GO:0005623//cell;[F]GO:0003677//DNA binding;GO:0005488//binding;GO:1901363//heterocyclic compound binding;GO:0003676//nucleic acid binding;GO:01401…	[C]cell;organelle;[F]transcription regulator activity;binding;	cellular_component;molecular_function
Solyc06g033860.1	[P]GO:0071704//organic substance metabolic process;GO:0044237//cellular metabolic process;GO:0043436//oxoacid metabolic process;GO:0006807//nitrogen compound metabolic process;GO:0044281//small molecule metabolic process;GO:0009987//cellular process;GO:0006520//cellular amino acid metabolic process;GO:1901564//organonitrogen compound metabolic process;GO:0044238//primary metabolic process;GO:0006…	[P]cellular process;metabolic process;[F]catalytic activity;binding;	molecular_function;biological_process
Solyc06g035580.2
Solyc06g035600.2
Solyc06g048920.2	[P]GO:1901575//organic substance catabolic process;GO:0045087//innate immune response;GO:0009056//catabolic process;GO:0006952//defense response;GO:1901136//carbohydrate derivative catabolic process;GO:0051707//response to other organism;GO:1901576//organic substance biosynthetic process;GO:0006955//immune response;GO:0046486//glycerolipid metabolic process;GO:0008610//lipid biosynthetic process;…	[C]organelle;protein-containing complex;organelle part;cell;[P]response to stimulus;cellular process;immune system process;multi-organism process;metabolic process;[F]binding;catalytic activity;	molecular_function;biological_process;cellular_component
Solyc06g051460.2	[P]GO:1901700//response to oxygen-containing compound;GO:0042221//response to chemical;GO:0071704//organic substance metabolic process;GO:0043170//macromolecule metabolic process;GO:0006807//nitrogen compound metabolic process;GO:0009719//response to endogenous stimulus;GO:1901564//organonitrogen compound metabolic process;GO:0050896//response to stimulus;GO:0033993//response to lipid;GO:1902347/…	[P]response to stimulus;metabolic process;[F]binding;	molecular_function;biological_process
Solyc06g052010.1
Solyc06g053960.2	[C]GO:0044424//intracellular part;GO:0044464//cell part;GO:0005634//nucleus;GO:0043231//intracellular membrane-bounded organelle;GO:0043226//organelle;GO:0043229//intracellular organelle;GO:0043227//membrane-bounded organelle;GO:0005623//cell;GO:0005622//intracellular;[F]GO:0005488//binding;GO:0140110//transcription regulator activity;GO:0003677//DNA binding;GO:0003700//DNA-binding transcription …	[C]cell;organelle;[F]binding;transcription regulator activity;	molecular_function;cellular_component
Solyc06g059860.2
Solyc06g060340.2	[P]GO:0044237//cellular metabolic process;GO:0008152//metabolic process;GO:0009987//cellular process;GO:0015979//photosynthesis;[C]GO:0005622//intracellular;GO:0043231//intracellular membrane-bounded organelle;GO:0031224//intrinsic component of membrane;GO:0009579//thylakoid;GO:0043226//organelle;GO:0016021//integral component of membrane;GO:0044464//cell part;GO:0044444//cytoplasmic part;GO:0005…	[C]protein-containing complex;membrane;organelle part;cell;membrane part;organelle;[P]cellular process;metabolic process;	cellular_component;biological_process
Solyc06g065900.2
Solyc06g066170.2
Solyc06g066240.2	[C]GO:0044425//membrane part;GO:0031224//intrinsic component of membrane;GO:0016020//membrane;GO:0016021//integral component of membrane;[F]GO:0043167//ion binding;GO:0020037//heme binding;GO:0043169//cation binding;GO:0046914//transition metal ion binding;GO:0016491//oxidoreductase activity;GO:0016705//oxidoreductase activity, acting on paired donors, with incorporation or reduction of molecular…	[C]membrane part;membrane;[F]catalytic activity;binding;	cellular_component;molecular_function
Solyc06g066590.2
Solyc06g067870.2	[F]GO:0016491//oxidoreductase activity;GO:0046872//metal ion binding;GO:0051213//dioxygenase activity;GO:0005488//binding;GO:0003824//catalytic activity;GO:0043167//ion binding;GO:0043169//cation binding;	[F]catalytic activity;binding;	molecular_function
Solyc06g068270.2	[F]GO:0043169//cation binding;GO:0005488//binding;GO:0046872//metal ion binding;GO:0003824//catalytic activity;GO:0043167//ion binding;GO:0016491//oxidoreductase activity;	[F]catalytic activity;binding;	molecular_function
Solyc06g070950.1	[C]GO:0044425//membrane part;GO:0016020//membrane;GO:0016021//integral component of membrane;GO:0031224//intrinsic component of membrane;[F]GO:0003824//catalytic activity;GO:0016818//hydrolase activity, acting on acid anhydrides, in phosphorus-containing anhydrides;GO:0097159//organic cyclic compound binding;GO:0016787//hydrolase activity;GO:0032555//purine ribonucleotide binding;GO:0016462//pyro…	[C]membrane part;membrane;[F]transporter activity;binding;catalytic activity;	cellular_component;molecular_function
Solyc06g071330.2	[C]GO:0016021//integral component of membrane;GO:0016020//membrane;GO:0031224//intrinsic component of membrane;GO:0044425//membrane part;[F]GO:0022857//transmembrane transporter activity;GO:0005215//transporter activity;	[C]membrane;membrane part;[F]transporter activity;	cellular_component;molecular_function
Solyc06g073080.2	[F]GO:0003824//catalytic activity;GO:0043167//ion binding;GO:0005488//binding;GO:0043169//cation binding;GO:0046872//metal ion binding;GO:0016491//oxidoreductase activity;	[F]binding;catalytic activity;	molecular_function
Solyc06g073560.2	[P]GO:0055086//nucleobase-containing small molecule metabolic process;GO:0006195//purine nucleotide catabolic process;GO:0033865//nucleoside bisphosphate metabolic process;GO:1901361//organic cyclic compound catabolic process;GO:0036115//fatty-acyl-CoA catabolic process;GO:0034654//nucleobase-containing compound biosynthetic process;GO:0033869//nucleoside bisphosphate catabolic process;GO:0009166…	[C]organelle;cell;[P]metabolic process;cellular process;[F]catalytic activity;binding;	molecular_function;biological_process;cellular_component
Solyc06g074820.2	[C]GO:0016020//membrane;GO:0031224//intrinsic component of membrane;GO:0044425//membrane part;GO:0016021//integral component of membrane;[F]GO:0005372//water transmembrane transporter activity;GO:0005215//transporter activity;GO:0015318//inorganic molecular entity transmembrane transporter activity;GO:0015267//channel activity;GO:0015250//water channel activity;GO:0022838//substrate-specific chan…	[C]membrane part;membrane;[F]transporter activity;	cellular_component;molecular_function
Solyc06g074850.2	[F]GO:0070011//peptidase activity, acting on L-amino acid peptides;GO:0070008//serine-type exopeptidase activity;GO:0003824//catalytic activity;GO:0008233//peptidase activity;GO:0140096//catalytic activity, acting on a protein;GO:0008238//exopeptidase activity;GO:0016787//hydrolase activity;GO:0004185//serine-type carboxypeptidase activity;GO:0008236//serine-type peptidase activity;GO:0004180//ca…	[F]catalytic activity;	molecular_function
Solyc06g083470.2
Solyc07g005100.2	[P]GO:0044238//primary metabolic process;GO:0005975//carbohydrate metabolic process;GO:0071704//organic substance metabolic process;GO:0008152//metabolic process;[F]GO:0005488//binding;GO:0008061//chitin binding;GO:0097367//carbohydrate derivative binding;GO:0008144//drug binding;	[P]metabolic process;[F]binding;	biological_process;molecular_function
Solyc07g005110.2
Solyc07g006000.2	[P]GO:0009059//macromolecule biosynthetic process;GO:0009987//cellular process;GO:0009058//biosynthetic process;GO:0043043//peptide biosynthetic process;GO:0008152//metabolic process;GO:0044249//cellular biosynthetic process;GO:0006412//translation;GO:0044267//cellular protein metabolic process;GO:1901564//organonitrogen compound metabolic process;GO:0006518//peptide metabolic process;GO:0034641/…	[C]organelle;protein-containing complex;cell;[P]cellular process;metabolic process;[F]structural molecule activity;	molecular_function;biological_process;cellular_component
Solyc07g007280.2
Solyc07g008100.2
Solyc07g009410.2
Solyc07g009440.1	[P]GO:0048544//recognition of pollen;GO:0009875//pollen-pistil interaction;GO:0032501//multicellular organismal process;GO:0009987//cellular process;GO:0044706//multi-multicellular organism process;GO:0000003//reproduction;GO:0007154//cell communication;GO:0051704//multi-organism process;GO:0008037//cell recognition;GO:0022414//reproductive process;GO:0009856//pollination;[C]GO:0031224//intrinsic…	[C]membrane part;membrane;[P]reproduction;multi-organism process;multicellular organismal process;cellular process;reproductive process;[F]catalytic activity;binding;	cellular_component;biological_process;molecular_function
Solyc07g017610.2	[C]GO:0016021//integral component of membrane;GO:0031224//intrinsic component of membrane;GO:0016020//membrane;GO:0044425//membrane part;[F]GO:0016491//oxidoreductase activity;GO:0003824//catalytic activity;	[C]membrane part;membrane;[F]catalytic activity;	cellular_component;molecular_function
Solyc07g021340.2	[C]GO:0043229//intracellular organelle;GO:0005737//cytoplasm;GO:1990904//ribonucleoprotein complex;GO:0043228//non-membrane-bounded organelle;GO:0044464//cell part;GO:0044444//cytoplasmic part;GO:0005622//intracellular;GO:0005623//cell;GO:0043232//intracellular non-membrane-bounded organelle;GO:0044424//intracellular part;GO:0032991//protein-containing complex;GO:0005840//ribosome;GO:0043226//org…	[C]cell;organelle;protein-containing complex;	cellular_component
Solyc07g021630.2	[P]GO:0044238//primary metabolic process;GO:0044283//small molecule biosynthetic process;GO:0019752//carboxylic acid metabolic process;GO:0006520//cellular amino acid metabolic process;GO:0016053//organic acid biosynthetic process;GO:0009082//branched-chain amino acid biosynthetic process;GO:0071704//organic substance metabolic process;GO:0046394//carboxylic acid biosynthetic process;GO:0006082//…	[P]metabolic process;cellular process;[F]catalytic activity;	biological_process;molecular_function
Solyc07g039420.1	[F]GO:0032553//ribonucleotide binding;GO:0032555//purine ribonucleotide binding;GO:0097367//carbohydrate derivative binding;GO:0097159//organic cyclic compound binding;GO:0043168//anion binding;GO:0017076//purine nucleotide binding;GO:0000166//nucleotide binding;GO:0043531//ADP binding;GO:0005488//binding;GO:0030554//adenyl nucleotide binding;GO:1901265//nucleoside phosphate binding;GO:1901363//h…	[F]binding;	molecular_function
Solyc07g041920.2	[F]GO:0070011//peptidase activity, acting on L-amino acid peptides;GO:0008234//cysteine-type peptidase activity;GO:0008233//peptidase activity;GO:0003824//catalytic activity;GO:0016787//hydrolase activity;GO:0140096//catalytic activity, acting on a protein;	[F]catalytic activity;	molecular_function
Solyc07g042550.2	[P]GO:0005984//disaccharide metabolic process;GO:0009311//oligosaccharide metabolic process;GO:0005985//sucrose metabolic process;GO:0044237//cellular metabolic process;GO:0008152//metabolic process;GO:0009987//cellular process;GO:0044238//primary metabolic process;GO:0044262//cellular carbohydrate metabolic process;GO:0071704//organic substance metabolic process;GO:0005975//carbohydrate metaboli…	[P]metabolic process;cellular process;[F]catalytic activity;	biological_process;molecular_function
Solyc07g049530.2	[P]GO:0048856//anatomical structure development;GO:0009835//fruit ripening;GO:0007275//multicellular organism development;GO:0010817//regulation of hormone levels;GO:0048608//reproductive structure development;GO:1900673//olefin metabolic process;GO:0044249//cellular biosynthetic process;GO:0032501//multicellular organismal process;GO:0043449//cellular alkene metabolic process;GO:0044237//cellula…	[P]biological regulation;reproductive process;metabolic process;reproduction;cellular process;developmental process;multicellular organismal process;[F]binding;catalytic activity;	biological_process;molecular_function
Solyc07g052610.2	[P]GO:0050790//regulation of catalytic activity;GO:0000079//regulation of cyclin-dependent protein serine/threonine kinase activity;GO:0050789//regulation of biological process;GO:0065009//regulation of molecular function;GO:0032268//regulation of cellular protein metabolic process;GO:0071900//regulation of protein serine/threonine kinase activity;GO:0001932//regulation of protein phosphorylation…	[P]biological regulation;[F]binding;	molecular_function;biological_process
Solyc07g053420.2	[C]GO:0031224//intrinsic component of membrane;GO:0044425//membrane part;GO:0016020//membrane;GO:0016021//integral component of membrane;[F]GO:0003824//catalytic activity;GO:0016874//ligase activity;	[C]membrane;membrane part;[F]catalytic activity;	cellular_component;molecular_function
Solyc07g053890.2	[P]GO:0044237//cellular metabolic process;GO:0044238//primary metabolic process;GO:0044249//cellular biosynthetic process;GO:0008152//metabolic process;GO:0046486//glycerolipid metabolic process;GO:0071704//organic substance metabolic process;GO:0045017//glycerolipid biosynthetic process;GO:0044255//cellular lipid metabolic process;GO:1901576//organic substance biosynthetic process;GO:0009058//bi…	[P]metabolic process;cellular process;[F]catalytic activity;	molecular_function;biological_process
Solyc07g054170.2	[P]GO:0044703//multi-organism reproductive process;GO:0051704//multi-organism process;GO:0000003//reproduction;GO:0022414//reproductive process;GO:0019953//sexual reproduction;[C]GO:0016021//integral component of membrane;GO:0031224//intrinsic component of membrane;GO:0005576//extracellular region;GO:0044425//membrane part;GO:0016020//membrane;	[C]membrane;membrane part;extracellular region;[P]reproduction;multi-organism process;reproductive process;	cellular_component;biological_process
Solyc07g054820.2	[P]GO:0071840//cellular component organization or biogenesis;GO:0016043//cellular component organization;GO:0006091//generation of precursor metabolites and energy;GO:0015979//photosynthesis;GO:0044237//cellular metabolic process;GO:0010207//photosystem II assembly;GO:0009987//cellular process;GO:0034622//cellular protein-containing complex assembly;GO:0044085//cellular component biogenesis;GO:00…	[C]organelle part;membrane part;cell;organelle;membrane;[P]cellular component organization or biogenesis;cellular process;metabolic process;	biological_process;cellular_component
Solyc07g055490.2	[C]GO:0016020//membrane;GO:0044425//membrane part;GO:0031224//intrinsic component of membrane;GO:0016021//integral component of membrane;[F]GO:0046906//tetrapyrrole binding;GO:0020037//heme binding;GO:0043169//cation binding;GO:1901363//heterocyclic compound binding;GO:0016491//oxidoreductase activity;GO:0046872//metal ion binding;GO:0003824//catalytic activity;GO:0005506//iron ion binding;GO:004…	[C]membrane part;membrane;[F]catalytic activity;binding;	molecular_function;cellular_component
Solyc07g056000.2	[P]GO:0016043//cellular component organization;GO:0010411//xyloglucan metabolic process;GO:0071555//cell wall organization;GO:0044264//cellular polysaccharide metabolic process;GO:0044085//cellular component biogenesis;GO:0044036//cell wall macromolecule metabolic process;GO:0006073//cellular glucan metabolic process;GO:0042546//cell wall biogenesis;GO:0044042//glucan metabolic process;GO:0005975…	[C]cell;extracellular region;[P]cellular process;cellular component organization or biogenesis;metabolic process;[F]catalytic activity;	biological_process;molecular_function;cellular_component
Solyc07g056280.2	[C]GO:0044424//intracellular part;GO:0043227//membrane-bounded organelle;GO:0005623//cell;GO:0043231//intracellular membrane-bounded organelle;GO:0005622//intracellular;GO:0043229//intracellular organelle;GO:0044464//cell part;GO:0005634//nucleus;GO:0043226//organelle;[F]GO:0005488//binding;GO:0003677//DNA binding;GO:0043565//sequence-specific DNA binding;GO:0140110//transcription regulator activ…	[C]organelle;cell;[F]binding;transcription regulator activity;	cellular_component;molecular_function
Solyc07g062480.1
Solyc07g062710.2	[F]GO:0140110//transcription regulator activity;GO:0003700//DNA-binding transcription factor activity;	[F]transcription regulator activity;	molecular_function
Solyc07g063320.2	[F]GO:0003824//catalytic activity;	[F]catalytic activity;	molecular_function
Solyc07g063730.1
Solyc07g064830.2	[P]GO:0032501//multicellular organismal process;GO:0055114//oxidation-reduction process;GO:0006112//energy reserve metabolic process;GO:0044264//cellular polysaccharide metabolic process;GO:0048856//anatomical structure development;GO:0044262//cellular carbohydrate metabolic process;GO:0005975//carbohydrate metabolic process;GO:0016051//carbohydrate biosynthetic process;GO:0033692//cellular polys…	[C]organelle;cell;[P]cellular process;metabolic process;multicellular organismal process;developmental process;[F]binding;catalytic activity;	biological_process;cellular_component;molecular_function
Solyc08g006500.2	[C]GO:0016020//membrane;GO:0031224//intrinsic component of membrane;GO:0016021//integral component of membrane;GO:0044425//membrane part;[F]GO:0022835//transmitter-gated channel activity;GO:0022857//transmembrane transporter activity;GO:0005215//transporter activity;GO:0015075//ion transmembrane transporter activity;GO:0060089//molecular transducer activity;GO:0030594//neurotransmitter receptor a…	[C]membrane;membrane part;[F]transporter activity;molecular transducer activity;	molecular_function;cellular_component
Solyc08g006930.2	[P]GO:0009987//cellular process;GO:0008152//metabolic process;GO:0015979//photosynthesis;GO:0044237//cellular metabolic process;[C]GO:0009536//plastid;GO:0044464//cell part;GO:0031976//plastid thylakoid;GO:0009521//photosystem;GO:0043226//organelle;GO:0005737//cytoplasm;GO:0016020//membrane;GO:0098796//membrane protein complex;GO:0009522//photosystem I;GO:0009507//chloroplast;GO:0044435//plastid …	[C]protein-containing complex;organelle;membrane;cell;organelle part;membrane part;[P]cellular process;metabolic process;	cellular_component;biological_process
Solyc08g007210.2	[F]GO:0016740//transferase activity;GO:0016746//transferase activity, transferring acyl groups;GO:0016747//transferase activity, transferring acyl groups other than amino-acyl groups;GO:0003824//catalytic activity;	[F]catalytic activity;	molecular_function
Solyc08g007420.2	[P]GO:0044281//small molecule metabolic process;GO:0044237//cellular metabolic process;GO:0009987//cellular process;GO:0019752//carboxylic acid metabolic process;GO:0071704//organic substance metabolic process;GO:0005975//carbohydrate metabolic process;GO:0043436//oxoacid metabolic process;GO:0044238//primary metabolic process;GO:0008152//metabolic process;GO:0006082//organic acid metabolic proce…	[C]cell;[P]cellular process;metabolic process;[F]catalytic activity;	cellular_component;biological_process;molecular_function
Solyc08g007460.2	[C]GO:0016020//membrane;GO:0044425//membrane part;GO:0031224//intrinsic component of membrane;GO:0016021//integral component of membrane;	[C]membrane part;membrane;	cellular_component
Solyc08g014120.2	[F]GO:0046983//protein dimerization activity;GO:0005488//binding;GO:0005515//protein binding;	[F]binding;	molecular_function
Solyc08g016580.1
Solyc08g042100.2
Solyc08g043180.2	[P]GO:0015979//photosynthesis;GO:0044237//cellular metabolic process;GO:0008152//metabolic process;GO:0009987//cellular process;[C]GO:0009521//photosystem;GO:0005622//intracellular;GO:0016020//membrane;GO:0044464//cell part;GO:0009654//photosystem II oxygen evolving complex;GO:0032991//protein-containing complex;GO:1990204//oxidoreductase complex;GO:0042651//thylakoid membrane;GO:0044436//thylako…	[C]protein-containing complex;membrane part;cell;membrane;[P]cellular process;metabolic process;[F]binding;	biological_process;cellular_component;molecular_function
Solyc08g060920.2	[P]GO:0007154//cell communication;GO:0009991//response to extracellular stimulus;GO:0006950//response to stress;GO:0033554//cellular response to stress;GO:0009267//cellular response to starvation;GO:0050896//response to stimulus;GO:0042594//response to starvation;GO:0071496//cellular response to external stimulus;GO:0031669//cellular response to nutrient levels;GO:0031667//response to nutrient le…	[P]cellular process;response to stimulus;	biological_process
Solyc08g066490.2	[C]GO:0031224//intrinsic component of membrane;GO:0016020//membrane;GO:0044425//membrane part;GO:0016021//integral component of membrane;[F]GO:0097159//organic cyclic compound binding;GO:0030554//adenyl nucleotide binding;GO:0003824//catalytic activity;GO:0005524//ATP binding;GO:0016740//transferase activity;GO:0043168//anion binding;GO:0097367//carbohydrate derivative binding;GO:0017076//purine …	[C]membrane;membrane part;[F]catalytic activity;binding;	molecular_function;cellular_component
Solyc08g066550.2	[F]GO:0140096//catalytic activity, acting on a protein;GO:0061630//ubiquitin protein ligase activity;GO:0005488//binding;GO:0008270//zinc ion binding;GO:0043169//cation binding;GO:0003824//catalytic activity;GO:0016740//transferase activity;GO:0019787//ubiquitin-like protein transferase activity;GO:0004842//ubiquitin-protein transferase activity;GO:0046914//transition metal ion binding;GO:0043167…	[F]catalytic activity;binding;	molecular_function
Solyc08g068490.2
Solyc08g075080.2
Solyc08g075680.2
Solyc08g076220.2	[P]GO:0005975//carbohydrate metabolic process;GO:0008152//metabolic process;GO:0071704//organic substance metabolic process;GO:0044238//primary metabolic process;[F]GO:0097159//organic cyclic compound binding;GO:0000166//nucleotide binding;GO:0043167//ion binding;GO:0032555//purine ribonucleotide binding;GO:0032553//ribonucleotide binding;GO:0036094//small molecule binding;GO:1901363//heterocycli…	[P]metabolic process;[F]catalytic activity;binding;	molecular_function;biological_process
Solyc08g079870.1	[F]GO:0003824//catalytic activity;GO:0070011//peptidase activity, acting on L-amino acid peptides;GO:0008236//serine-type peptidase activity;GO:0004252//serine-type endopeptidase activity;GO:0008233//peptidase activity;GO:0004175//endopeptidase activity;GO:0017171//serine hydrolase activity;GO:0016787//hydrolase activity;GO:0140096//catalytic activity, acting on a protein;	[F]catalytic activity;	molecular_function
Solyc08g080100.2	[P]GO:0031325//positive regulation of cellular metabolic process;GO:0019222//regulation of metabolic process;GO:1903506//regulation of nucleic acid-templated transcription;GO:0010628//positive regulation of gene expression;GO:0009889//regulation of biosynthetic process;GO:0010557//positive regulation of macromolecule biosynthetic process;GO:0010468//regulation of gene expression;GO:0031328//posit…	[C]organelle;cell;[P]biological regulation;[F]transcription regulator activity;binding;	cellular_component;molecular_function;biological_process
Solyc08g080620.1
Solyc08g082080.2	[C]GO:0016020//membrane;GO:0044425//membrane part;GO:0031224//intrinsic component of membrane;GO:0016021//integral component of membrane;	[C]membrane;membrane part;	cellular_component
Solyc09g007030.2	[P]GO:0009987//cellular process;GO:0006928//movement of cell or subcellular component;GO:0007017//microtubule-based process;GO:0007018//microtubule-based movement;[F]GO:0017076//purine nucleotide binding;GO:0000166//nucleotide binding;GO:0016462//pyrophosphatase activity;GO:0043168//anion binding;GO:0005515//protein binding;GO:0005524//ATP binding;GO:0097159//organic cyclic compound binding;GO:00…	[P]cellular process;[F]catalytic activity;binding;	molecular_function;biological_process
Solyc09g008260.2
Solyc09g009010.2	[C]GO:0031224//intrinsic component of membrane;GO:0016021//integral component of membrane;GO:0044425//membrane part;GO:0016020//membrane;[F]GO:0016740//transferase activity;GO:0003824//catalytic activity;	[C]membrane;membrane part;[F]catalytic activity;	cellular_component;molecular_function
Solyc09g009590.1	[F]GO:1901363//heterocyclic compound binding;GO:0043169//cation binding;GO:0046914//transition metal ion binding;GO:0046872//metal ion binding;GO:0003677//DNA binding;GO:0003676//nucleic acid binding;GO:0043167//ion binding;GO:0005488//binding;GO:0008270//zinc ion binding;GO:0097159//organic cyclic compound binding;	[F]binding;	molecular_function
Solyc09g010000.2	[F]GO:0005488//binding;GO:0043169//cation binding;GO:0043167//ion binding;GO:0046872//metal ion binding;GO:0003824//catalytic activity;GO:0016491//oxidoreductase activity;	[F]catalytic activity;binding;	molecular_function
Solyc09g011080.2	[F]GO:0030554//adenyl nucleotide binding;GO:0032559//adenyl ribonucleotide binding;GO:0032553//ribonucleotide binding;GO:0000166//nucleotide binding;GO:0043167//ion binding;GO:0036094//small molecule binding;GO:0043168//anion binding;GO:0097159//organic cyclic compound binding;GO:0035639//purine ribonucleoside triphosphate binding;GO:1901265//nucleoside phosphate binding;GO:0005524//ATP binding;G…	[F]binding;	molecular_function
Solyc09g011260.1	[P]GO:0050789//regulation of biological process;GO:0035556//intracellular signal transduction;GO:0050896//response to stimulus;GO:0051716//cellular response to stimulus;GO:0050794//regulation of cellular process;GO:0023052//signaling;GO:0007154//cell communication;GO:0007165//signal transduction;GO:0009987//cellular process;GO:0065007//biological regulation;[F]GO:0016740//transferase activity;GO:…	[P]response to stimulus;cellular process;biological regulation;signaling;[F]catalytic activity;binding;	molecular_function;biological_process
Solyc09g011490.2
Solyc09g011550.2	[F]GO:0003824//catalytic activity;GO:0016740//transferase activity;	[F]catalytic activity;	molecular_function
Solyc09g011670.2
Solyc09g014520.2	[P]GO:0044237//cellular metabolic process;GO:0044260//cellular macromolecule metabolic process;GO:0006807//nitrogen compound metabolic process;GO:0006464//cellular protein modification process;GO:0006091//generation of precursor metabolites and energy;GO:0036211//protein modification process;GO:0009765//photosynthesis, light harvesting;GO:0044238//primary metabolic process;GO:1901564//organonitro…	[C]membrane;membrane part;protein-containing complex;organelle;cell;organelle part;[P]cellular process;metabolic process;[F]binding;	cellular_component;biological_process;molecular_function
Solyc09g057920.2
Solyc09g061410.1	[P]GO:0009888//tissue development;GO:0010087//phloem or xylem histogenesis;GO:0032502//developmental process;GO:0048856//anatomical structure development;GO:0010089//xylem development;[C]GO:0031224//intrinsic component of membrane;GO:0016021//integral component of membrane;GO:0016020//membrane;GO:0044425//membrane part;[F]GO:0005102//signaling receptor binding;GO:0005515//protein binding;GO:00054…	[C]membrane part;membrane;[P]developmental process;[F]binding;	cellular_component;molecular_function;biological_process
Solyc09g061420.2
Solyc09g074430.2	[F]GO:0050661//NADP binding;GO:0016491//oxidoreductase activity;GO:0043168//anion binding;GO:0050662//coenzyme binding;GO:0050660//flavin adenine dinucleotide binding;GO:0016709//oxidoreductase activity, acting on paired donors, with incorporation or reduction of molecular oxygen, NAD(P)H as one donor, and incorporation of one atom of oxygen;GO:0005488//binding;GO:0043167//ion binding;GO:0003824/…	[F]catalytic activity;binding;	molecular_function
Solyc09g083190.2	[P]GO:0006950//response to stress;GO:0006979//response to oxidative stress;GO:0050896//response to stimulus;[C]GO:0016020//membrane;GO:0044434//chloroplast part;GO:0044425//membrane part;GO:0034357//photosynthetic membrane;GO:0009579//thylakoid;GO:0005737//cytoplasm;GO:0031984//organelle subcompartment;GO:0044435//plastid part;GO:0044446//intracellular organelle part;GO:0031224//intrinsic compone…	[C]membrane part;organelle;cell;organelle part;membrane;[P]response to stimulus;	biological_process;cellular_component
Solyc09g089680.2	[F]GO:0005488//binding;GO:0016491//oxidoreductase activity;GO:0046872//metal ion binding;GO:0043167//ion binding;GO:0043169//cation binding;GO:0003824//catalytic activity;	[F]catalytic activity;binding;	molecular_function
Solyc09g090070.1	[P]GO:0006811//ion transport;GO:0006817//phosphate ion transport;GO:0051234//establishment of localization;GO:0006810//transport;GO:0015698//inorganic anion transport;GO:0006820//anion transport;GO:0051179//localization;[C]GO:0016021//integral component of membrane;GO:0031224//intrinsic component of membrane;GO:0016020//membrane;GO:0044425//membrane part;[F]GO:0015291//secondary active transmembr…	[C]membrane part;membrane;[P]localization;[F]transporter activity;	cellular_component;biological_process;molecular_function
Solyc09g091880.2	[C]GO:0043231//intracellular membrane-bounded organelle;GO:0005634//nucleus;GO:0043226//organelle;GO:0044464//cell part;GO:0043229//intracellular organelle;GO:0043227//membrane-bounded organelle;GO:0005623//cell;GO:0044424//intracellular part;GO:0005622//intracellular;[F]GO:1901363//heterocyclic compound binding;GO:0005488//binding;GO:0097159//organic cyclic compound binding;GO:0003677//DNA bindi…	[C]organelle;cell;[F]binding;	cellular_component;molecular_function
Solyc09g097910.2	[C]GO:0043229//intracellular organelle;GO:0043226//organelle;GO:0043228//non-membrane-bounded organelle;GO:0032991//protein-containing complex;GO:0044444//cytoplasmic part;GO:0044424//intracellular part;GO:0005840//ribosome;GO:0044464//cell part;GO:0005737//cytoplasm;GO:0005622//intracellular;GO:0005623//cell;GO:1990904//ribonucleoprotein complex;GO:0043232//intracellular non-membrane-bounded org…	[C]protein-containing complex;organelle;cell;[F]binding;	molecular_function;cellular_component
Solyc09g098080.2	[F]GO:0003824//catalytic activity;GO:0016758//transferase activity, transferring hexosyl groups;GO:0016740//transferase activity;GO:0016757//transferase activity, transferring glycosyl groups;	[F]catalytic activity;	molecular_function
Solyc10g005540.2	[F]GO:0016740//transferase activity;GO:0003824//catalytic activity;GO:0008168//methyltransferase activity;GO:0016741//transferase activity, transferring one-carbon groups;	[F]catalytic activity;	molecular_function
Solyc10g006710.2	[P]GO:0032501//multicellular organismal process;GO:0009875//pollen-pistil interaction;GO:0007154//cell communication;GO:0000003//reproduction;GO:0051704//multi-organism process;GO:0009987//cellular process;GO:0008037//cell recognition;GO:0022414//reproductive process;GO:0009856//pollination;GO:0048544//recognition of pollen;GO:0044706//multi-multicellular organism process;[C]GO:0044425//membrane …	[C]membrane part;membrane;[P]reproduction;multi-organism process;multicellular organismal process;cellular process;reproductive process;[F]catalytic activity;binding;	biological_process;molecular_function;cellular_component
Solyc10g007750.1	[C]GO:0044425//membrane part;GO:0016021//integral component of membrane;GO:0031224//intrinsic component of membrane;GO:0016020//membrane;	[C]membrane;membrane part;	cellular_component
Solyc10g008080.1	[C]GO:0044425//membrane part;GO:0031224//intrinsic component of membrane;GO:0016020//membrane;GO:0016021//integral component of membrane;[F]GO:0016874//ligase activity;GO:0003824//catalytic activity;	[C]membrane;membrane part;[F]catalytic activity;	cellular_component;molecular_function
Solyc10g009190.1
Solyc10g009530.2	[F]GO:0050662//coenzyme binding;GO:0003824//catalytic activity;GO:0005488//binding;GO:0048037//cofactor binding;	[F]binding;catalytic activity;	molecular_function
Solyc10g018530.1	[P]GO:1903046//meiotic cell cycle process;GO:0006725//cellular aromatic compound metabolic process;GO:0009987//cellular process;GO:0045132//meiotic chromosome segregation;GO:0044238//primary metabolic process;GO:1901360//organic cyclic compound metabolic process;GO:0070192//chromosome organization involved in meiotic cell cycle;GO:0071840//cellular component organization or biogenesis;GO:0046483/…	[C]membrane;membrane part;cell;protein-containing complex;[P]response to stimulus;reproduction;reproductive process;metabolic process;cellular component organization or biogenesis;cellular process;[F]binding;catalytic activity;	biological_process;cellular_component;molecular_function
Solyc10g047410.1	[P]GO:0044238//primary metabolic process;GO:0006091//generation of precursor metabolites and energy;GO:0019538//protein metabolic process;GO:0008152//metabolic process;GO:0071704//organic substance metabolic process;GO:0022900//electron transport chain;GO:0009767//photosynthetic electron transport chain;GO:0018298//protein-chromophore linkage;GO:0006807//nitrogen compound metabolic process;GO:000…	[C]protein-containing complex;cell;organelle part;membrane part;membrane;organelle;[P]cellular process;metabolic process;[F]binding;catalytic activity;	cellular_component;biological_process;molecular_function
Solyc10g075100.1	[P]GO:0010876//lipid localization;GO:0006810//transport;GO:0051234//establishment of localization;GO:0071702//organic substance transport;GO:0006869//lipid transport;GO:0051179//localization;GO:0033036//macromolecule localization;[F]GO:0008289//lipid binding;GO:0005488//binding;	[P]localization;[F]binding;	molecular_function;biological_process
Solyc10g075150.1	[P]GO:0051234//establishment of localization;GO:0010876//lipid localization;GO:0051179//localization;GO:0033036//macromolecule localization;GO:0006869//lipid transport;GO:0006810//transport;GO:0071702//organic substance transport;[F]GO:0008289//lipid binding;GO:0005488//binding;	[P]localization;[F]binding;	biological_process;molecular_function
Solyc10g079230.1	[C]GO:0031224//intrinsic component of membrane;GO:0044425//membrane part;GO:0016021//integral component of membrane;GO:0016020//membrane;	[C]membrane;membrane part;	cellular_component
Solyc10g079520.1	[C]GO:0016020//membrane;GO:0016021//integral component of membrane;GO:0044425//membrane part;GO:0031224//intrinsic component of membrane;	[C]membrane part;membrane;	cellular_component
Solyc10g079860.1	[P]GO:0044238//primary metabolic process;GO:0008152//metabolic process;GO:0071704//organic substance metabolic process;GO:0005975//carbohydrate metabolic process;[F]GO:0016787//hydrolase activity;GO:0003824//catalytic activity;GO:0008422//beta-glucosidase activity;GO:0042973//glucan endo-1,3-beta-D-glucosidase activity;GO:0016798//hydrolase activity, acting on glycosyl bonds;GO:0015926//glucosida…	[P]metabolic process;[F]catalytic activity;	molecular_function;biological_process
Solyc10g080490.1
Solyc10g080570.1	[P]GO:0048856//anatomical structure development;GO:0007275//multicellular organism development;GO:0044237//cellular metabolic process;GO:0044260//cellular macromolecule metabolic process;GO:0044267//cellular protein metabolic process;GO:0043632//modification-dependent macromolecule catabolic process;GO:0044248//cellular catabolic process;GO:0070647//protein modification by small protein conjugati…	[C]organelle;cell;[P]cellular process;developmental process;multicellular organismal process;metabolic process;[F]binding;catalytic activity;	biological_process;cellular_component;molecular_function
Solyc10g080940.1	[P]GO:0007017//microtubule-based process;GO:0009987//cellular process;[C]GO:0015630//microtubule cytoskeleton;GO:0043228//non-membrane-bounded organelle;GO:0044446//intracellular organelle part;GO:0044430//cytoskeletal part;GO:0043226//organelle;GO:0099081//supramolecular polymer;GO:0005856//cytoskeleton;GO:0005623//cell;GO:0005737//cytoplasm;GO:0099080//supramolecular complex;GO:0043232//intrace…	[C]cell;organelle;organelle part;supramolecular complex;[P]cellular process;[F]binding;catalytic activity;structural molecule activity;	cellular_component;molecular_function;biological_process
Solyc10g083290.1	[P]GO:0071704//organic substance metabolic process;GO:0005975//carbohydrate metabolic process;GO:0044238//primary metabolic process;GO:0008152//metabolic process;[F]GO:0004553//hydrolase activity, hydrolyzing O-glycosyl compounds;GO:0016798//hydrolase activity, acting on glycosyl bonds;GO:0003824//catalytic activity;GO:0016787//hydrolase activity;GO:0004564//beta-fructofuranosidase activity;	[P]metabolic process;[F]catalytic activity;	molecular_function;biological_process
Solyc10g083400.1	[C]GO:0031224//intrinsic component of membrane;GO:0016020//membrane;GO:0044425//membrane part;GO:0016021//integral component of membrane;[F]GO:0097159//organic cyclic compound binding;GO:1901363//heterocyclic compound binding;GO:0005488//binding;GO:0046872//metal ion binding;GO:0016705//oxidoreductase activity, acting on paired donors, with incorporation or reduction of molecular oxygen;GO:004316…	[C]membrane;membrane part;[F]catalytic activity;binding;	molecular_function;cellular_component
Solyc10g084290.1
Solyc10g084960.1	[F]GO:0016740//transferase activity;GO:0003824//catalytic activity;	[F]catalytic activity;	molecular_function
Solyc10g086390.1
Solyc11g006420.1	[C]GO:0005623//cell;GO:0044464//cell part;GO:0044424//intracellular part;GO:0005622//intracellular;GO:0005737//cytoplasm;[F]GO:0016791//phosphatase activity;GO:0008253//5'-nucleotidase activity;GO:0000287//magnesium ion binding;GO:0046872//metal ion binding;GO:0005488//binding;GO:0008252//nucleotidase activity;GO:0016788//hydrolase activity, acting on ester bonds;GO:0043169//cation binding;GO:004…	[C]cell;[F]catalytic activity;binding;	molecular_function;cellular_component
Solyc11g007250.1	[F]GO:0005488//binding;GO:0097159//organic cyclic compound binding;GO:0032559//adenyl ribonucleotide binding;GO:0005524//ATP binding;GO:0043168//anion binding;GO:0032553//ribonucleotide binding;GO:0016301//kinase activity;GO:0017076//purine nucleotide binding;GO:0000166//nucleotide binding;GO:0016772//transferase activity, transferring phosphorus-containing groups;GO:0003824//catalytic activity;G…	[F]binding;catalytic activity;	molecular_function
Solyc11g008600.1
Solyc11g008640.1	[P]GO:0009648//photoperiodism;GO:0065007//biological regulation;GO:0003006//developmental process involved in reproduction;GO:0048831//regulation of shoot system development;GO:0048573//photoperiodism, flowering;GO:0050789//regulation of biological process;GO:0048580//regulation of post-embryonic development;GO:2000241//regulation of reproductive process;GO:0009909//regulation of flower developme…	[P]reproduction;developmental process;multicellular organismal process;biological regulation;reproductive process;response to stimulus;[F]binding;	biological_process;molecular_function
Solyc11g008870.1	[P]GO:0006082//organic acid metabolic process;GO:0006732//coenzyme metabolic process;GO:0043603//cellular amide metabolic process;GO:0044237//cellular metabolic process;GO:0051186//cofactor metabolic process;GO:0046653//tetrahydrofolate metabolic process;GO:1901360//organic cyclic compound metabolic process;GO:0034641//cellular nitrogen compound metabolic process;GO:0043436//oxoacid metabolic pro…	[P]metabolic process;cellular process;[F]catalytic activity;	biological_process;molecular_function
Solyc11g013270.1	[P]GO:0044281//small molecule metabolic process;GO:0005975//carbohydrate metabolic process;GO:0019318//hexose metabolic process;GO:0071704//organic substance metabolic process;GO:0008152//metabolic process;GO:0005996//monosaccharide metabolic process;GO:0006004//fucose metabolic process;GO:0044238//primary metabolic process;[C]GO:0044425//membrane part;GO:0031224//intrinsic component of membrane;…	[C]membrane part;membrane;[P]metabolic process;[F]catalytic activity;	cellular_component;molecular_function;biological_process
Solyc11g017280.1
Solyc11g018500.1	[P]GO:0005975//carbohydrate metabolic process;GO:0044238//primary metabolic process;GO:0071704//organic substance metabolic process;GO:0008152//metabolic process;[F]GO:0004565//beta-galactosidase activity;GO:0016787//hydrolase activity;GO:0003824//catalytic activity;GO:0016798//hydrolase activity, acting on glycosyl bonds;GO:0004553//hydrolase activity, hydrolyzing O-glycosyl compounds;GO:0015925…	[P]metabolic process;[F]catalytic activity;	molecular_function;biological_process
Solyc11g042710.1	[F]GO:0016491//oxidoreductase activity;GO:0003824//catalytic activity;	[F]catalytic activity;	molecular_function
Solyc11g044530.1
Solyc11g044840.1	[P]GO:0008152//metabolic process;GO:0009058//biosynthetic process;[F]GO:0050662//coenzyme binding;GO:0030170//pyridoxal phosphate binding;GO:0048037//cofactor binding;GO:0005488//binding;GO:0043167//ion binding;GO:0097159//organic cyclic compound binding;GO:0043168//anion binding;GO:0016769//transferase activity, transferring nitrogenous groups;GO:0008144//drug binding;GO:0036094//small molecule …	[P]metabolic process;[F]catalytic activity;binding;	molecular_function;biological_process
Solyc11g064750.1
Solyc11g064800.1	[P]GO:0044260//cellular macromolecule metabolic process;GO:0043170//macromolecule metabolic process;GO:0009987//cellular process;GO:0006259//DNA metabolic process;GO:0008152//metabolic process;GO:0015074//DNA integration;GO:0006139//nucleobase-containing compound metabolic process;GO:0046483//heterocycle metabolic process;GO:0006725//cellular aromatic compound metabolic process;GO:0090304//nuclei…	[P]metabolic process;cellular process;[F]binding;	molecular_function;biological_process
Solyc11g071290.1	[P]GO:0008152//metabolic process;GO:0055114//oxidation-reduction process;[F]GO:0003824//catalytic activity;GO:0016491//oxidoreductase activity;GO:0046914//transition metal ion binding;GO:0008270//zinc ion binding;GO:0005488//binding;GO:0046872//metal ion binding;GO:0043167//ion binding;GO:0043169//cation binding;	[P]metabolic process;[F]binding;catalytic activity;	molecular_function;biological_process
Solyc11g072490.1
Solyc11g072930.1	[C]GO:0044425//membrane part;GO:0016020//membrane;GO:0031224//intrinsic component of membrane;GO:0016021//integral component of membrane;	[C]membrane part;membrane;	cellular_component
Solyc12g005720.1
Solyc12g006120.1
Solyc12g009070.1	[P]GO:0044237//cellular metabolic process;GO:0009987//cellular process;GO:0008152//metabolic process;GO:0015979//photosynthesis;[C]GO:0044464//cell part;GO:0005622//intracellular;GO:0009521//photosystem;GO:0009523//photosystem II;GO:0005623//cell;GO:0098796//membrane protein complex;GO:0044436//thylakoid part;GO:0044424//intracellular part;GO:0016020//membrane;GO:0044425//membrane part;GO:0016021…	[C]membrane part;cell;protein-containing complex;membrane;[P]metabolic process;cellular process;	biological_process;cellular_component
Solyc12g009700.1	[P]GO:0071702//organic substance transport;GO:0010876//lipid localization;GO:0006810//transport;GO:0033036//macromolecule localization;GO:0051179//localization;GO:0051234//establishment of localization;GO:0006869//lipid transport;[C]GO:0016020//membrane;GO:0016021//integral component of membrane;GO:0044425//membrane part;GO:0031224//intrinsic component of membrane;[F]GO:0008289//lipid binding;GO:…	[C]membrane part;membrane;[P]localization;[F]binding;	molecular_function;cellular_component;biological_process
Solyc12g009740.1	[P]GO:0051179//localization;GO:0071702//organic substance transport;GO:0006869//lipid transport;GO:0006810//transport;GO:0010876//lipid localization;GO:0051234//establishment of localization;GO:0033036//macromolecule localization;[C]GO:0016020//membrane;GO:0031224//intrinsic component of membrane;GO:0016021//integral component of membrane;GO:0044425//membrane part;[F]GO:0008289//lipid binding;GO:…	[C]membrane;membrane part;[P]localization;[F]binding;	biological_process;molecular_function;cellular_component
Solyc12g009770.1	[C]GO:0044425//membrane part;GO:0016020//membrane;GO:0031224//intrinsic component of membrane;GO:0016021//integral component of membrane;	[C]membrane;membrane part;	cellular_component
Solyc12g010410.1	[P]GO:2000112//regulation of cellular macromolecule biosynthetic process;GO:0031326//regulation of cellular biosynthetic process;GO:2001141//regulation of RNA biosynthetic process;GO:0060255//regulation of macromolecule metabolic process;GO:0019222//regulation of metabolic process;GO:1903506//regulation of nucleic acid-templated transcription;GO:0019219//regulation of nucleobase-containing compou…	[C]organelle;cell;[P]biological regulation;[F]binding;	biological_process;cellular_component;molecular_function
Solyc12g010940.1
Solyc12g013680.1	[C]GO:0016020//membrane;GO:0044425//membrane part;GO:0016021//integral component of membrane;GO:0031224//intrinsic component of membrane;	[C]membrane;membrane part;	cellular_component
Solyc12g036390.1	[F]GO:0005516//calmodulin binding;GO:0005515//protein binding;GO:0005488//binding;	[F]binding;	molecular_function
Solyc12g042480.1	[C]GO:0016020//membrane;GO:0044425//membrane part;GO:0031224//intrinsic component of membrane;GO:0016021//integral component of membrane;[F]GO:0016705//oxidoreductase activity, acting on paired donors, with incorporation or reduction of molecular oxygen;GO:0004497//monooxygenase activity;GO:1901363//heterocyclic compound binding;GO:0046872//metal ion binding;GO:0005506//iron ion binding;GO:004690…	[C]membrane;membrane part;[F]catalytic activity;binding;	molecular_function;cellular_component
Solyc12g042580.1	[C]GO:0044425//membrane part;GO:0016021//integral component of membrane;GO:0031224//intrinsic component of membrane;GO:0016020//membrane;[F]GO:0003824//catalytic activity;GO:0016491//oxidoreductase activity;GO:0009055//electron transfer activity;	[C]membrane;membrane part;[F]catalytic activity;	cellular_component;molecular_function
Solyc12g042730.1
Solyc12g043150.1	[P]GO:0051179//localization;GO:0051234//establishment of localization;GO:0071705//nitrogen compound transport;GO:0071702//organic substance transport;GO:0015833//peptide transport;GO:0045184//establishment of protein localization;GO:0033036//macromolecule localization;GO:0008104//protein localization;GO:0015031//protein transport;GO:0042886//amide transport;GO:0006810//transport;	[P]localization;	biological_process
Solyc12g044940.1
Solyc12g044950.1	[P]GO:0071704//organic substance metabolic process;GO:0008152//metabolic process;GO:0006629//lipid metabolic process;GO:0044238//primary metabolic process;[C]GO:0031224//intrinsic component of membrane;GO:0016020//membrane;GO:0044425//membrane part;GO:0016021//integral component of membrane;[F]GO:0003824//catalytic activity;GO:0016717//oxidoreductase activity, acting on paired donors, with oxidat…	[C]membrane part;membrane;[P]metabolic process;[F]catalytic activity;	biological_process;molecular_function;cellular_component
Solyc12g056160.1	[C]GO:0044425//membrane part;GO:0016020//membrane;GO:0031224//intrinsic component of membrane;GO:0016021//integral component of membrane;[F]GO:0015078//proton transmembrane transporter activity;GO:0022804//active transmembrane transporter activity;GO:0015298//solute:cation antiporter activity;GO:0015297//antiporter activity;GO:0015291//secondary active transmembrane transporter activity;GO:001507…	[C]membrane;membrane part;[F]transporter activity;	molecular_function;cellular_component
Solyc12g062250.1
Solyc12g087870.1	[C]GO:0016020//membrane;GO:0016021//integral component of membrane;GO:0044425//membrane part;GO:0031224//intrinsic component of membrane;[F]GO:0005215//transporter activity;	[C]membrane;membrane part;[F]transporter activity;	molecular_function;cellular_component
Solyc12g089130.1
Solyc12g094640.1	[P]GO:0006006//glucose metabolic process;GO:0044238//primary metabolic process;GO:0019318//hexose metabolic process;GO:0005996//monosaccharide metabolic process;GO:0044281//small molecule metabolic process;GO:0008152//metabolic process;GO:0071704//organic substance metabolic process;GO:0005975//carbohydrate metabolic process;[C]GO:0044464//cell part;GO:0005737//cytoplasm;GO:0043231//intracellular…	[C]cell;organelle;[P]metabolic process;[F]binding;catalytic activity;	cellular_component;molecular_function;biological_process
Solyc12g098990.1	[P]GO:0048868//pollen tube development;GO:0048856//anatomical structure development;GO:0044706//multi-multicellular organism process;GO:0009553//embryo sac development;GO:0051704//multi-organism process;GO:0032501//multicellular organismal process;GO:0009793//embryo development ending in seed dormancy;GO:0009856//pollination;GO:0009791//post-embryonic development;GO:0048229//gametophyte developme…	[C]cell;organelle;[P]multicellular organismal process;reproduction;developmental process;reproductive process;multi-organism process;[F]binding;	cellular_component;biological_process;molecular_function
