# Supplementary material for: Potential Role of Domains Rearranged Methyltransferase7 in Starch and Chlorophyll Metabolism to Regulate Leaf Senescence in Tomato
Source: Front Plant Sci. 2022 Feb 8;13:836015. doi: 10.3389/fpls.2022.836015 (PMC8860812; doi:10.3389/fpls.2022.836015)
Supplement: Supplementary file 6 [file Table_5.XLSX]

## Sheet: GO terms of 128 DOWN meht-DEGs
Supplementary Table S5. GO terms of 128 down-regulated meth-DEGs.
GO Term ID	GO Term	Level 1	Level 2	Term Candidate Gene Num	Total Candidate Gene Num	Term Gene Num	Total Gene Num	Rich Ratio	P value	Q value
GO:0009523	photosystem II	cellular_component	cell	7	51	118	13066	0.059322	3.41392e-07	7.9952e-05
GO:0034357	photosynthetic membrane	cellular_component	cell	11	51	392	13066	0.0280612	2.49418e-07	7.9952e-05
GO:0044436	thylakoid part	cellular_component	cell	11	51	405	13066	0.0271605	3.45614e-07	7.9952e-05
GO:0009521	photosystem	cellular_component	cell	8	51	191	13066	0.0418848	6.69711e-07	0.000113607
GO:0009579	thylakoid	cellular_component	cell	11	51	445	13066	0.0247191	8.79168e-07	0.000113607
GO:0015979	photosynthesis	biological_process	cellular process	10	45	314	9817	0.0318471	1.14589e-06	0.000113607
GO:0042651	thylakoid membrane	cellular_component	cell	10	51	362	13066	0.0276243	1.09301e-06	0.000113607
GO:0019898	extrinsic component of membrane	cellular_component	membrane part	3	51	22	13066	0.136364	8.18809e-05	0.00710316
GO:0009507	chloroplast	cellular_component	cell	14	51	1185	13066	0.0118143	0.000123653	0.00953499
GO:0009654	photosystem II oxygen evolving complex	cellular_component	cell	3	51	27	13066	0.111111	0.000153395	0.00967782
GO:1990204	oxidoreductase complex	cellular_component	cell	4	51	68	13066	0.0588235	0.000139463	0.00967782
GO:0009536	plastid	cellular_component	cell	14	51	1226	13066	0.0114192	0.000177658	0.0102746
GO:0009535	chloroplast thylakoid membrane	cellular_component	organelle part	7	51	337	13066	0.0207715	0.000311266	0.0157095
GO:0055035	plastid thylakoid membrane	cellular_component	organelle part	7	51	338	13066	0.0207101	0.000316907	0.0157095
GO:0009534	chloroplast thylakoid	cellular_component	organelle part	7	51	366	13066	0.0191257	0.000511545	0.0199823
GO:0031976	plastid thylakoid	cellular_component	organelle part	7	51	366	13066	0.0191257	0.000511545	0.0199823
GO:0044434	chloroplast part	cellular_component	organelle part	10	51	732	13066	0.0136612	0.000451097	0.0199823
GO:0044435	plastid part	cellular_component	organelle part	10	51	745	13066	0.0134228	0.000518273	0.0199823
GO:0098796	membrane protein complex	cellular_component	protein-containing complex	8	51	511	13066	0.0156556	0.000748743	0.0273488
GO:0004185	serine-type carboxypeptidase activity	molecular_function	catalytic activity	3	83	54	17591	0.0555556	0.00211235	0.0732985
GO:0008168	methyltransferase activity	molecular_function	catalytic activity	7	83	396	17591	0.0176768	0.00265722	0.0878147
GO:0070008	serine-type exopeptidase activity	molecular_function	catalytic activity	3	83	60	17591	0.05	0.00285568	0.0900837
GO:0031977	thylakoid lumen	cellular_component	cell	2	51	21	13066	0.0952381	0.00299155	0.0902668
GO:0016741	transferase activity, transferring one-carbon groups	molecular_function	catalytic activity	7	83	411	17591	0.0170316	0.00326458	0.0944007
GO:0004180	carboxypeptidase activity	molecular_function	catalytic activity	3	83	68	17591	0.0441176	0.0040707	0.113003
GO:0009064	glutamine family amino acid metabolic process	biological_process	cellular process	3	45	74	9817	0.0405405	0.00464962	0.124109
GO:0005975	carbohydrate metabolic process	biological_process	metabolic process	10	45	873	9817	0.0114548	0.00528429	0.133151
GO:0031984	organelle subcompartment	cellular_component	organelle part	8	51	700	13066	0.0114286	0.0053721	0.133151
GO:0000578	embryonic axis specification	biological_process	multicellular organismal process	1	45	2	9817	0.5	0.00914722	0.142038
GO:0004489	methylenetetrahydrofolate reductase (NAD(P)H) activity	molecular_function	catalytic activity	1	83	2	17591	0.5	0.00941465	0.142038
GO:0004558	alpha-1,4-glucosidase activity	molecular_function	catalytic activity	1	83	2	17591	0.5	0.00941465	0.142038
GO:0004822	isoleucine-tRNA ligase activity	molecular_function	catalytic activity	1	83	2	17591	0.5	0.00941465	0.142038
GO:0006428	isoleucyl-tRNA aminoacylation	biological_process	cellular process	1	45	2	9817	0.5	0.00914722	0.142038
GO:0008187	poly-pyrimidine tract binding	molecular_function	binding	1	83	2	17591	0.5	0.00941465	0.142038
GO:0008266	poly(U) RNA binding	molecular_function	binding	1	83	2	17591	0.5	0.00941465	0.142038
GO:0008762	UDP-N-acetylmuramate dehydrogenase activity	molecular_function	catalytic activity	1	83	2	17591	0.5	0.00941465	0.142038
GO:0009526	plastid envelope	cellular_component	organelle part	4	51	210	13066	0.0190476	0.0089864	0.142038
GO:0009880	embryonic pattern specification	biological_process	multicellular organismal process	1	45	2	9817	0.5	0.00914722	0.142038
GO:0009941	chloroplast envelope	cellular_component	organelle part	4	51	204	13066	0.0196078	0.00813333	0.142038
GO:0018423	protein C-terminal leucine carboxyl O-methyltransferase activity	molecular_function	catalytic activity	1	83	2	17591	0.5	0.00941465	0.142038
GO:0019684	photosynthesis, light reaction	biological_process	cellular process	4	45	173	9817	0.0231214	0.00790888	0.142038
GO:0032450	maltose alpha-glucosidase activity	molecular_function	catalytic activity	1	83	2	17591	0.5	0.00941465	0.142038
GO:0051026	chiasma assembly	biological_process	cellular component organization or biogenesis	1	45	2	9817	0.5	0.00914722	0.142038
GO:0072659	protein localization to plasma membrane	biological_process	localization	1	45	2	9817	0.5	0.00914722	0.142038
GO:1902347	response to strigolactone	biological_process	response to stimulus	1	45	2	9817	0.5	0.00914722	0.142038
GO:1990778	protein localization to cell periphery	biological_process	localization	1	45	2	9817	0.5	0.00914722	0.142038
GO:0008152	metabolic process	biological_process	metabolic process	34	45	5698	9817	0.00596701	0.0110692	0.163447
GO:0000179	rRNA (adenine-N6,N6-)-dimethyltransferase activity	molecular_function	catalytic activity	1	83	3	17591	0.333333	0.0140891	0.168548
GO:0003844	1,4-alpha-glucan branching enzyme activity	molecular_function	catalytic activity	1	83	3	17591	0.333333	0.0140891	0.168548
GO:0003880	protein C-terminal carboxyl O-methyltransferase activity	molecular_function	catalytic activity	1	83	3	17591	0.333333	0.0140891	0.168548
GO:0004324	ferredoxin-NADP+ reductase activity	molecular_function	catalytic activity	1	83	3	17591	0.333333	0.0140891	0.168548
GO:0008238	exopeptidase activity	molecular_function	catalytic activity	3	83	103	17591	0.0291262	0.0127696	0.168548
GO:0008757	S-adenosylmethionine-dependent methyltransferase activity	molecular_function	catalytic activity	3	83	107	17591	0.0280374	0.0141409	0.168548
GO:0010411	xyloglucan metabolic process	biological_process	cellular process	2	45	39	9817	0.0512821	0.0136715	0.168548
GO:0016433	rRNA (adenine) methyltransferase activity	molecular_function	catalytic activity	1	83	3	17591	0.333333	0.0140891	0.168548
GO:0016731	oxidoreductase activity, acting on iron-sulfur proteins as donors, NAD or NADP as acceptor	molecular_function	catalytic activity	1	83	3	17591	0.333333	0.0140891	0.168548
GO:0016762	xyloglucan:xyloglucosyl transferase activity	molecular_function	catalytic activity	2	83	37	17591	0.0540541	0.0131628	0.168548
GO:0048046	apoplast	cellular_component	extracellular region	3	51	131	13066	0.0229008	0.0144517	0.168548
GO:0051287	NAD binding	molecular_function	binding	3	83	105	17591	0.0285714	0.0134452	0.168548
GO:1901605	alpha-amino acid metabolic process	biological_process	cellular process	4	45	207	9817	0.0193237	0.0145719	0.168548
GO:0004367	glycerol-3-phosphate dehydrogenase [NAD+] activity	molecular_function	catalytic activity	1	83	4	17591	0.25	0.0187417	0.178175
GO:0006538	glutamate catabolic process	biological_process	cellular process	1	45	4	9817	0.25	0.0182126	0.178175
GO:0006541	glutamine metabolic process	biological_process	cellular process	2	45	46	9817	0.0434783	0.0187134	0.178175
GO:0007155	cell adhesion	biological_process	biological adhesion	1	45	4	9817	0.25	0.0182126	0.178175
GO:0008253	5'-nucleotidase activity	molecular_function	catalytic activity	1	83	4	17591	0.25	0.0187417	0.178175
GO:0008429	phosphatidylethanolamine binding	molecular_function	binding	1	83	4	17591	0.25	0.0187417	0.178175
GO:0009791	post-embryonic development	biological_process	multicellular organismal process	4	45	222	9817	0.018018	0.0183832	0.178175
GO:0010340	carboxyl-O-methyltransferase activity	molecular_function	catalytic activity	1	83	4	17591	0.25	0.0187417	0.178175
GO:0022610	biological adhesion	biological_process	biological adhesion	1	45	4	9817	0.25	0.0182126	0.178175
GO:0042803	protein homodimerization activity	molecular_function	binding	2	83	44	17591	0.0454545	0.0183037	0.178175
GO:0043649	dicarboxylic acid catabolic process	biological_process	cellular process	1	45	4	9817	0.25	0.0182126	0.178175
GO:0046168	glycerol-3-phosphate catabolic process	biological_process	cellular process	1	45	4	9817	0.25	0.0182126	0.178175
GO:0051998	protein carboxyl O-methyltransferase activity	molecular_function	catalytic activity	1	83	4	17591	0.25	0.0187417	0.178175
GO:0006520	cellular amino acid metabolic process	biological_process	cellular process	5	45	342	9817	0.0146199	0.0194395	0.179402
GO:0008173	RNA methyltransferase activity	molecular_function	catalytic activity	2	83	46	17591	0.0434783	0.0199048	0.179402
GO:0009331	glycerol-3-phosphate dehydrogenase complex	cellular_component	cell	1	51	5	13066	0.2	0.0193675	0.179402
GO:0045156	electron transporter, transferring electrons within the cyclic electron transport pathway of photosynthesis activity	molecular_function	catalytic activity	2	83	46	17591	0.0434783	0.0199048	0.179402
GO:0008171	O-methyltransferase activity	molecular_function	catalytic activity	2	83	48	17591	0.0416667	0.0215624	0.19185
GO:0007129	synapsis	biological_process	cellular component organization or biogenesis	1	45	5	9817	0.2	0.0227149	0.197051
GO:0045143	homologous chromosome segregation	biological_process	cellular component organization or biogenesis	1	45	5	9817	0.2	0.0227149	0.197051
GO:0004351	glutamate decarboxylase activity	molecular_function	catalytic activity	1	83	5	17591	0.2	0.0233727	0.200255
GO:0000977	RNA polymerase II regulatory region sequence-specific DNA binding	molecular_function	binding	2	83	53	17591	0.0377358	0.0259462	0.216947
GO:0001012	RNA polymerase II regulatory region DNA binding	molecular_function	binding	2	83	53	17591	0.0377358	0.0259462	0.216947
GO:0006072	glycerol-3-phosphate metabolic process	biological_process	cellular process	1	45	6	9817	0.166667	0.0271969	0.219473
GO:0006091	generation of precursor metabolites and energy	biological_process	cellular process	5	45	372	9817	0.0134409	0.0268176	0.219473
GO:0052646	alditol phosphate metabolic process	biological_process	cellular process	1	45	6	9817	0.166667	0.0271969	0.219473
GO:0090599	alpha-glucosidase activity	molecular_function	catalytic activity	1	83	6	17591	0.166667	0.027982	0.223213
GO:0003824	catalytic activity	molecular_function	catalytic activity	59	83	10642	17591	0.00554407	0.0293353	0.231349
GO:0000003	reproduction	biological_process	reproduction	5	45	408	9817	0.0122549	0.037799	0.233766
GO:0000911	cytokinesis by cell plate formation	biological_process	cellular process	1	45	10	9817	0.1	0.0449249	0.233766
GO:0000976	transcription regulatory region sequence-specific DNA binding	molecular_function	binding	2	83	62	17591	0.0322581	0.034652	0.233766
GO:0003727	single-stranded RNA binding	molecular_function	binding	1	83	7	17591	0.142857	0.0325699	0.233766
GO:0004553	hydrolase activity, hydrolyzing O-glycosyl compounds	molecular_function	catalytic activity	5	83	405	17591	0.0123457	0.0425783	0.233766
GO:0005086	ARF guanyl-nucleotide exchange factor activity	molecular_function	molecular function regulator	1	83	9	17591	0.111111	0.0416815	0.233766
GO:0005768	endosome	cellular_component	cell	2	51	82	13066	0.0243902	0.0406886	0.233766
GO:0005977	glycogen metabolic process	biological_process	cellular process	1	45	9	9817	0.111111	0.0405228	0.233766
GO:0005978	glycogen biosynthetic process	biological_process	cellular process	1	45	9	9817	0.111111	0.0405228	0.233766
GO:0006073	cellular glucan metabolic process	biological_process	cellular process	3	45	149	9817	0.0201342	0.0305658	0.233766
GO:0006112	energy reserve metabolic process	biological_process	cellular process	1	45	9	9817	0.111111	0.0405228	0.233766
GO:0006536	glutamate metabolic process	biological_process	cellular process	1	45	8	9817	0.125	0.0361008	0.233766
GO:0009065	glutamine family amino acid catabolic process	biological_process	cellular process	1	45	9	9817	0.111111	0.0405228	0.233766
GO:0009648	photoperiodism	biological_process	response to stimulus	1	45	8	9817	0.125	0.0361008	0.233766
GO:0009767	photosynthetic electron transport chain	biological_process	cellular process	2	45	66	9817	0.030303	0.0366135	0.233766
GO:0009790	embryo development	biological_process	multicellular organismal process	2	45	69	9817	0.0289855	0.0397014	0.233766
GO:0009793	embryo development ending in seed dormancy	biological_process	multicellular organismal process	2	45	69	9817	0.0289855	0.0397014	0.233766
GO:0010054	trichoblast differentiation	biological_process	cellular process	1	45	10	9817	0.1	0.0449249	0.233766
GO:0010101	post-embryonic root morphogenesis	biological_process	multicellular organismal process	1	45	8	9817	0.125	0.0361008	0.233766
GO:0010102	lateral root morphogenesis	biological_process	multicellular organismal process	1	45	8	9817	0.125	0.0361008	0.233766
GO:0010311	lateral root formation	biological_process	multicellular organismal process	1	45	8	9817	0.125	0.0361008	0.233766
GO:0010383	cell wall polysaccharide metabolic process	biological_process	cellular process	2	45	70	9817	0.0285714	0.0407521	0.233766
GO:0010410	hemicellulose metabolic process	biological_process	cellular process	2	45	66	9817	0.030303	0.0366135	0.233766
GO:0016730	oxidoreductase activity, acting on iron-sulfur proteins as donors	molecular_function	catalytic activity	1	83	7	17591	0.142857	0.0325699	0.233766
GO:0022414	reproductive process	biological_process	reproductive process	5	45	405	9817	0.0123457	0.0367918	0.233766
GO:0032012	regulation of ARF protein signal transduction	biological_process	biological regulation	1	45	9	9817	0.111111	0.0405228	0.233766
GO:0032506	cytokinetic process	biological_process	cellular process	1	45	10	9817	0.1	0.0449249	0.233766
GO:0032509	endosome transport via multivesicular body sorting pathway	biological_process	localization	1	45	7	9817	0.142857	0.0316588	0.233766
GO:0035999	tetrahydrofolate interconversion	biological_process	cellular process	1	45	10	9817	0.1	0.0449249	0.233766
GO:0044042	glucan metabolic process	biological_process	metabolic process	3	45	149	9817	0.0201342	0.0305658	0.233766
GO:0044210	'de novo' CTP biosynthetic process	biological_process	cellular process	1	45	10	9817	0.1	0.0449249	0.233766
GO:0044264	cellular polysaccharide metabolic process	biological_process	cellular process	3	45	174	9817	0.0172414	0.0451365	0.233766
GO:0045132	meiotic chromosome segregation	biological_process	cellular component organization or biogenesis	1	45	8	9817	0.125	0.0361008	0.233766
GO:0045944	positive regulation of transcription by RNA polymerase II	biological_process	biological regulation	2	45	62	9817	0.0322581	0.0326507	0.233766
GO:0046578	regulation of Ras protein signal transduction	biological_process	biological regulation	1	45	9	9817	0.111111	0.0405228	0.233766
GO:0048469	cell maturation	biological_process	cellular process	1	45	10	9817	0.1	0.0449249	0.233766
GO:0048527	lateral root development	biological_process	multicellular organismal process	1	45	10	9817	0.1	0.0449249	0.233766
GO:0048528	post-embryonic root development	biological_process	multicellular organismal process	1	45	10	9817	0.1	0.0449249	0.233766
GO:0048573	photoperiodism, flowering	biological_process	multicellular organismal process	1	45	8	9817	0.125	0.0361008	0.233766
GO:0048764	trichoblast maturation	biological_process	cellular process	1	45	10	9817	0.1	0.0449249	0.233766
GO:0048765	root hair cell differentiation	biological_process	cellular process	1	45	10	9817	0.1	0.0449249	0.233766
GO:0050662	coenzyme binding	molecular_function	binding	6	83	530	17591	0.0113208	0.0391421	0.233766
GO:0051056	regulation of small GTPase mediated signal transduction	biological_process	biological regulation	1	45	9	9817	0.111111	0.0405228	0.233766
GO:0070192	chromosome organization involved in meiotic cell cycle	biological_process	cellular component organization or biogenesis	1	45	9	9817	0.111111	0.0405228	0.233766
GO:0071985	multivesicular body sorting pathway	biological_process	localization	1	45	8	9817	0.125	0.0361008	0.233766
GO:1902410	mitotic cytokinetic process	biological_process	cellular process	1	45	10	9817	0.1	0.0449249	0.233766
GO:0003883	CTP synthase activity	molecular_function	catalytic activity	1	83	10	17591	0.1	0.0462055	0.23753
GO:0042802	identical protein binding	molecular_function	binding	2	83	74	17591	0.027027	0.0477428	0.243629
GO:0009527	plastid outer membrane	cellular_component	organelle part	1	51	13	13066	0.0769231	0.0495931	0.249403
GO:0009707	chloroplast outer membrane	cellular_component	organelle part	1	51	13	13066	0.0769231	0.0495931	0.249403
GO:0005372	water transmembrane transporter activity	molecular_function	transporter activity	1	83	11	17591	0.0909091	0.0507083	0.249586
GO:0015250	water channel activity	molecular_function	transporter activity	1	83	11	17591	0.0909091	0.0507083	0.249586
GO:0050661	NADP binding	molecular_function	binding	2	83	76	17591	0.0263158	0.0500756	0.249586
GO:0005737	cytoplasm	cellular_component	cell	21	51	3907	13066	0.00537497	0.0566897	0.252196
GO:0008252	nucleotidase activity	molecular_function	catalytic activity	1	83	12	17591	0.0833333	0.0551902	0.252196
GO:0008649	rRNA methyltransferase activity	molecular_function	catalytic activity	1	83	12	17591	0.0833333	0.0551902	0.252196
GO:0009798	axis specification	biological_process	multicellular organismal process	1	45	12	9817	0.0833333	0.0536701	0.252196
GO:0010053	root epidermal cell differentiation	biological_process	cellular process	1	45	12	9817	0.0833333	0.0536701	0.252196
GO:0010207	photosystem II assembly	biological_process	cellular component organization or biogenesis	1	45	12	9817	0.0833333	0.0536701	0.252196
GO:0016020	membrane	cellular_component	membrane	36	51	7678	13066	0.00468872	0.0555383	0.252196
GO:0016798	hydrolase activity, acting on glycosyl bonds	molecular_function	catalytic activity	5	83	432	17591	0.0115741	0.0534608	0.252196
GO:0016868	intramolecular transferase activity, phosphotransferases	molecular_function	catalytic activity	1	83	12	17591	0.0833333	0.0551902	0.252196
GO:0042546	cell wall biogenesis	biological_process	cellular component organization or biogenesis	2	45	84	9817	0.0238095	0.0565167	0.252196
GO:0044444	cytoplasmic part	cellular_component	cell	19	51	3414	13066	0.00556532	0.052856	0.252196
GO:0048608	reproductive structure development	biological_process	multicellular organismal process	3	45	190	9817	0.0157895	0.0559826	0.252196
GO:0061458	reproductive system development	biological_process	multicellular organismal process	3	45	190	9817	0.0157895	0.0559826	0.252196
GO:0090697	post-embryonic plant organ morphogenesis	biological_process	multicellular organismal process	1	45	12	9817	0.0833333	0.0536701	0.252196
GO:0140102	catalytic activity, acting on a rRNA	molecular_function	catalytic activity	1	83	12	17591	0.0833333	0.0551902	0.252196
GO:0000281	mitotic cytokinesis	biological_process	cellular process	1	45	13	9817	0.0769231	0.0580133	0.253215
GO:0009926	auxin polar transport	biological_process	biological regulation	1	45	13	9817	0.0769231	0.0580133	0.253215
GO:0051704	multi-organism process	biological_process	multi-organism process	4	45	319	9817	0.0125392	0.0574901	0.253215
GO:0016646	oxidoreductase activity, acting on the CH-NH group of donors, NAD or NADP as acceptor	molecular_function	catalytic activity	1	83	13	17591	0.0769231	0.0596512	0.258737
GO:0000910	cytokinesis	biological_process	cellular process	1	45	14	9817	0.0714286	0.062337	0.259053
GO:0003690	double-stranded DNA binding	molecular_function	binding	3	83	189	17591	0.015873	0.0601	0.259053
GO:0006897	endocytosis	biological_process	localization	1	45	14	9817	0.0714286	0.062337	0.259053
GO:0046653	tetrahydrofolate metabolic process	biological_process	cellular process	1	45	14	9817	0.0714286	0.062337	0.259053
GO:0048316	seed development	biological_process	multicellular organismal process	2	45	88	9817	0.0227273	0.0613577	0.259053
GO:0061640	cytoskeleton-dependent cytokinesis	biological_process	cellular process	1	45	14	9817	0.0714286	0.062337	0.259053
GO:0090696	post-embryonic plant organ development	biological_process	multicellular organismal process	1	45	14	9817	0.0714286	0.062337	0.259053
GO:0004713	protein tyrosine kinase activity	molecular_function	catalytic activity	1	83	14	17591	0.0714286	0.0640913	0.264049
GO:0009522	photosystem I	cellular_component	cell	2	51	106	13066	0.0188679	0.0643	0.264049
GO:0009627	systemic acquired resistance	biological_process	multi-organism process	1	45	15	9817	0.0666667	0.0666413	0.267336
GO:0009914	hormone transport	biological_process	biological regulation	1	45	15	9817	0.0666667	0.0666413	0.267336
GO:0060918	auxin transport	biological_process	biological regulation	1	45	15	9817	0.0666667	0.0666413	0.267336
GO:0090627	plant epidermal cell differentiation	biological_process	cellular process	1	45	15	9817	0.0666667	0.0666413	0.267336
GO:0002161	aminoacyl-tRNA editing activity	molecular_function	catalytic activity	1	83	15	17591	0.0666667	0.0685108	0.27015
GO:0008970	phospholipase A1 activity	molecular_function	catalytic activity	1	83	15	17591	0.0666667	0.0685108	0.27015
GO:1902494	catalytic complex	cellular_component	protein-containing complex	4	51	396	13066	0.010101	0.0681798	0.27015
GO:0044425	membrane part	cellular_component	membrane part	34	51	7248	13066	0.00469095	0.0694951	0.272484
GO:0000079	regulation of cyclin-dependent protein serine/threonine kinase activity	biological_process	biological regulation	1	45	17	9817	0.0588235	0.0751919	0.28469
GO:0003006	developmental process involved in reproduction	biological_process	reproductive process	3	45	214	9817	0.0140187	0.0743606	0.28469
GO:0016197	endosomal transport	biological_process	localization	1	45	17	9817	0.0588235	0.0751919	0.28469
GO:0098657	import into cell	biological_process	localization	1	45	17	9817	0.0588235	0.0751919	0.28469
GO:1904029	regulation of cyclin-dependent protein kinase activity	biological_process	biological regulation	1	45	17	9817	0.0588235	0.0751919	0.28469
GO:1905393	plant organ formation	biological_process	developmental process	1	45	17	9817	0.0588235	0.0751919	0.28469
GO:1990837	sequence-specific double-stranded DNA binding	molecular_function	binding	2	83	96	17591	0.0208333	0.0754799	0.28469
GO:0044036	cell wall macromolecule metabolic process	biological_process	cellular process	2	45	100	9817	0.02	0.0766804	0.287655
GO:0010817	regulation of hormone levels	biological_process	biological regulation	2	45	101	9817	0.019802	0.0780079	0.291062
GO:0055114	oxidation-reduction process	biological_process	metabolic process	4	45	355	9817	0.0112676	0.0785701	0.291592
GO:0009694	jasmonic acid metabolic process	biological_process	biological regulation	1	45	18	9817	0.0555556	0.0794385	0.291695
GO:0019318	hexose metabolic process	biological_process	metabolic process	2	45	102	9817	0.0196078	0.0793427	0.291695
GO:0001067	regulatory region nucleic acid binding	molecular_function	binding	2	83	100	17591	0.02	0.0809678	0.292665
GO:0009605	response to external stimulus	biological_process	response to stimulus	3	45	221	9817	0.0135747	0.0801735	0.292665
GO:0044212	transcription regulatory region DNA binding	molecular_function	binding	2	83	100	17591	0.02	0.0809678	0.292665
GO:0015926	glucosidase activity	molecular_function	catalytic activity	1	83	18	17591	0.0555556	0.0816457	0.293586
GO:0006760	folic acid-containing compound metabolic process	biological_process	cellular process	1	45	19	9817	0.0526316	0.083666	0.296246
GO:0009553	embryo sac development	biological_process	multicellular organismal process	1	45	19	9817	0.0526316	0.083666	0.296246
GO:0048868	pollen tube development	biological_process	multi-organism process	1	45	19	9817	0.0526316	0.083666	0.296246
GO:0005996	monosaccharide metabolic process	biological_process	metabolic process	2	45	111	9817	0.018018	0.0916714	0.297174
GO:0006241	CTP biosynthetic process	biological_process	cellular process	1	45	21	9817	0.047619	0.0920641	0.297174
GO:0006357	regulation of transcription by RNA polymerase II	biological_process	biological regulation	2	45	108	9817	0.0185185	0.0875006	0.297174
GO:0006555	methionine metabolic process	biological_process	cellular process	1	45	20	9817	0.05	0.0878745	0.297174
GO:0006730	one-carbon metabolic process	biological_process	cellular process	1	45	20	9817	0.05	0.0878745	0.297174
GO:0009148	pyrimidine nucleoside triphosphate biosynthetic process	biological_process	cellular process	1	45	21	9817	0.047619	0.0920641	0.297174
GO:0009208	pyrimidine ribonucleoside triphosphate metabolic process	biological_process	cellular process	1	45	21	9817	0.047619	0.0920641	0.297174
GO:0009209	pyrimidine ribonucleoside triphosphate biosynthetic process	biological_process	cellular process	1	45	21	9817	0.047619	0.0920641	0.297174
GO:0010154	fruit development	biological_process	multicellular organismal process	2	45	110	9817	0.0181818	0.0902746	0.297174
GO:0010228	vegetative to reproductive phase transition of meristem	biological_process	multicellular organismal process	1	45	20	9817	0.05	0.0878745	0.297174
GO:0019752	carboxylic acid metabolic process	biological_process	cellular process	6	45	679	9817	0.00883652	0.0878029	0.297174
GO:0032991	protein-containing complex	cellular_component	protein-containing complex	12	51	2024	13066	0.00592885	0.0862254	0.297174
GO:0042558	pteridine-containing compound metabolic process	biological_process	cellular process	1	45	20	9817	0.05	0.0878745	0.297174
GO:0045893	positive regulation of transcription, DNA-templated	biological_process	biological regulation	2	45	111	9817	0.018018	0.0916714	0.297174
GO:0046036	CTP metabolic process	biological_process	cellular process	1	45	21	9817	0.047619	0.0920641	0.297174
GO:0071900	regulation of protein serine/threonine kinase activity	biological_process	biological regulation	1	45	21	9817	0.047619	0.0920641	0.297174
GO:0090698	post-embryonic plant morphogenesis	biological_process	developmental process	1	45	20	9817	0.05	0.0878745	0.297174
GO:1902680	positive regulation of RNA biosynthetic process	biological_process	biological regulation	2	45	111	9817	0.018018	0.0916714	0.297174
GO:1903508	positive regulation of nucleic acid-templated transcription	biological_process	biological regulation	2	45	111	9817	0.018018	0.0916714	0.297174
GO:0003684	damaged DNA binding	molecular_function	binding	1	83	21	17591	0.047619	0.0945977	0.300296
GO:0005200	structural constituent of cytoskeleton	molecular_function	structural molecule activity	1	83	21	17591	0.047619	0.0945977	0.300296
GO:0006082	organic acid metabolic process	biological_process	cellular process	6	45	696	9817	0.00862069	0.0961966	0.300296
GO:0009218	pyrimidine ribonucleotide metabolic process	biological_process	cellular process	1	45	23	9817	0.0434783	0.100387	0.300296
GO:0009220	pyrimidine ribonucleotide biosynthetic process	biological_process	cellular process	1	45	23	9817	0.0434783	0.100387	0.300296
GO:0010087	phloem or xylem histogenesis	biological_process	developmental process	1	45	22	9817	0.0454545	0.0962349	0.300296
GO:0016168	chlorophyll binding	molecular_function	binding	2	83	112	17591	0.0178571	0.0981269	0.300296
GO:0018298	protein-chromophore linkage	biological_process	cellular process	2	45	117	9817	0.017094	0.100185	0.300296
GO:0019904	protein domain specific binding	molecular_function	binding	1	83	22	17591	0.0454545	0.0988748	0.300296
GO:0043436	oxoacid metabolic process	biological_process	cellular process	6	45	694	9817	0.00864553	0.0951868	0.300296
GO:0044262	cellular carbohydrate metabolic process	biological_process	cellular process	3	45	241	9817	0.0124481	0.0978346	0.300296
GO:0045935	positive regulation of nucleobase-containing compound metabolic process	biological_process	biological regulation	2	45	117	9817	0.017094	0.100185	0.300296
GO:0046131	pyrimidine ribonucleoside metabolic process	biological_process	cellular process	1	45	23	9817	0.0434783	0.100387	0.300296
GO:0046132	pyrimidine ribonucleoside biosynthetic process	biological_process	cellular process	1	45	23	9817	0.0434783	0.100387	0.300296
GO:0046134	pyrimidine nucleoside biosynthetic process	biological_process	cellular process	1	45	23	9817	0.0434783	0.100387	0.300296
GO:0051254	positive regulation of RNA metabolic process	biological_process	biological regulation	2	45	113	9817	0.0176991	0.0944844	0.300296
GO:1902531	regulation of intracellular signal transduction	biological_process	biological regulation	1	45	23	9817	0.0434783	0.100387	0.300296
GO:0000049	tRNA binding	molecular_function	binding	1	83	23	17591	0.0434783	0.103132	0.303512
GO:0006213	pyrimidine nucleoside metabolic process	biological_process	cellular process	1	45	24	9817	0.0416667	0.10452	0.303512
GO:0008236	serine-type peptidase activity	molecular_function	catalytic activity	3	83	240	17591	0.0125	0.104524	0.303512
GO:0009147	pyrimidine nucleoside triphosphate metabolic process	biological_process	cellular process	1	45	24	9817	0.0416667	0.10452	0.303512
GO:0017171	serine hydrolase activity	molecular_function	catalytic activity	3	83	240	17591	0.0125	0.104524	0.303512
GO:0019899	enzyme binding	molecular_function	binding	2	83	116	17591	0.0172414	0.104058	0.303512
GO:0019901	protein kinase binding	molecular_function	binding	1	83	23	17591	0.0434783	0.103132	0.303512
GO:0004565	beta-galactosidase activity	molecular_function	catalytic activity	1	83	24	17591	0.0416667	0.107369	0.30791
GO:0031967	organelle envelope	cellular_component	organelle part	4	51	465	13066	0.00860215	0.107221	0.30791
GO:0031975	envelope	cellular_component	cell	4	51	465	13066	0.00860215	0.107221	0.30791
GO:0009814	defense response, incompatible interaction	biological_process	multi-organism process	1	45	25	9817	0.04	0.108635	0.308987
GO:0010015	root morphogenesis	biological_process	multicellular organismal process	1	45	25	9817	0.04	0.108635	0.308987
GO:0010557	positive regulation of macromolecule biosynthetic process	biological_process	biological regulation	2	45	124	9817	0.016129	0.110387	0.312688
GO:0016717	oxidoreductase activity, acting on paired donors, with oxidation of a pair of donors resulting in the reduction of molecular oxygen to two molecules of water	molecular_function	catalytic activity	1	83	25	17591	0.04	0.111587	0.314801
GO:0006006	glucose metabolic process	biological_process	metabolic process	1	45	26	9817	0.0384615	0.112732	0.316744
GO:0007275	multicellular organism development	biological_process	multicellular organismal process	4	45	407	9817	0.00982801	0.114947	0.321666
GO:0098542	defense response to other organism	biological_process	multi-organism process	2	45	128	9817	0.015625	0.116337	0.324249
GO:0005576	extracellular region	cellular_component	extracellular region	4	51	481	13066	0.00831601	0.117489	0.325814
GO:0010628	positive regulation of gene expression	biological_process	biological regulation	2	45	129	9817	0.0155039	0.117838	0.325814
GO:0009891	positive regulation of biosynthetic process	biological_process	biological regulation	2	45	130	9817	0.0153846	0.119343	0.327335
GO:0016616	oxidoreductase activity, acting on the CH-OH group of donors, NAD or NADP as acceptor	molecular_function	catalytic activity	2	83	127	17591	0.015748	0.120847	0.327335
GO:0016645	oxidoreductase activity, acting on the CH-NH group of donors	molecular_function	catalytic activity	1	83	27	17591	0.037037	0.119963	0.327335
GO:0031328	positive regulation of cellular biosynthetic process	biological_process	biological regulation	2	45	130	9817	0.0153846	0.119343	0.327335
GO:0032300	mismatch repair complex	cellular_component	cell	1	51	33	13066	0.030303	0.121218	0.327335
GO:0046527	glucosyltransferase activity	molecular_function	catalytic activity	2	83	127	17591	0.015748	0.120847	0.327335
GO:0005085	guanyl-nucleotide exchange factor activity	molecular_function	molecular function regulator	1	83	28	17591	0.0357143	0.124121	0.328363
GO:0007389	pattern specification process	biological_process	multicellular organismal process	1	45	29	9817	0.0344828	0.12491	0.328363
GO:0009606	tropism	biological_process	response to stimulus	1	45	29	9817	0.0344828	0.12491	0.328363
GO:0015925	galactosidase activity	molecular_function	catalytic activity	1	83	28	17591	0.0357143	0.124121	0.328363
GO:0019900	kinase binding	molecular_function	binding	1	83	28	17591	0.0357143	0.124121	0.328363
GO:0022402	cell cycle process	biological_process	cellular process	2	45	133	9817	0.0150376	0.123889	0.328363
GO:1990391	DNA repair complex	cellular_component	protein-containing complex	1	51	34	13066	0.0294118	0.124657	0.328363
GO:0009826	unidimensional cell growth	biological_process	cellular component organization or biogenesis	1	45	30	9817	0.0333333	0.128934	0.33766
GO:0009570	chloroplast stroma	cellular_component	organelle part	3	51	321	13066	0.00934579	0.129742	0.3385
GO:0048646	anatomical structure formation involved in morphogenesis	biological_process	developmental process	1	45	31	9817	0.0322581	0.132939	0.345541
GO:0005618	cell wall	cellular_component	cell	2	51	169	13066	0.0118343	0.140905	0.349244
GO:0009532	plastid stroma	cellular_component	organelle part	3	51	330	13066	0.00909091	0.137706	0.349244
GO:0009909	regulation of flower development	biological_process	biological regulation	1	45	33	9817	0.030303	0.140895	0.349244
GO:0015267	channel activity	molecular_function	transporter activity	2	83	138	17591	0.0144928	0.138249	0.349244
GO:0019953	sexual reproduction	biological_process	multi-organism process	1	45	33	9817	0.030303	0.140895	0.349244
GO:0022803	passive transmembrane transporter activity	molecular_function	transporter activity	2	83	138	17591	0.0144928	0.138249	0.349244
GO:0030312	external encapsulating structure	cellular_component	cell	2	51	169	13066	0.0118343	0.140905	0.349244
GO:0031410	cytoplasmic vesicle	cellular_component	cell	2	51	169	13066	0.0118343	0.140905	0.349244
GO:0031968	organelle outer membrane	cellular_component	organelle part	1	51	38	13066	0.0263158	0.13828	0.349244
GO:0048468	cell development	biological_process	cellular process	1	45	33	9817	0.030303	0.140895	0.349244
GO:0048731	system development	biological_process	multicellular organismal process	3	45	284	9817	0.0105634	0.140519	0.349244
GO:0060560	developmental growth involved in morphogenesis	biological_process	growth	1	45	33	9817	0.030303	0.140895	0.349244
GO:0097708	intracellular vesicle	cellular_component	cell	2	51	169	13066	0.0118343	0.140905	0.349244
GO:0043207	response to external biotic stimulus	biological_process	response to stimulus	2	45	145	9817	0.0137931	0.142477	0.350634
GO:0051707	response to other organism	biological_process	multi-organism process	2	45	145	9817	0.0137931	0.142477	0.350634
GO:0009163	nucleoside biosynthetic process	biological_process	cellular process	1	45	34	9817	0.0294118	0.144846	0.35148
GO:0042455	ribonucleoside biosynthetic process	biological_process	cellular process	1	45	34	9817	0.0294118	0.144846	0.35148
GO:0045859	regulation of protein kinase activity	biological_process	biological regulation	1	45	34	9817	0.0294118	0.144846	0.35148
GO:0098813	nuclear chromosome segregation	biological_process	cellular process	1	45	34	9817	0.0294118	0.144846	0.35148
GO:0001932	regulation of protein phosphorylation	biological_process	biological regulation	1	45	35	9817	0.0285714	0.14878	0.352851
GO:0019867	outer membrane	cellular_component	membrane	1	51	41	13066	0.0243902	0.148362	0.352851
GO:0031982	vesicle	cellular_component	organelle	2	51	175	13066	0.0114286	0.14897	0.352851
GO:0043549	regulation of kinase activity	biological_process	biological regulation	1	45	35	9817	0.0285714	0.14878	0.352851
GO:0044703	multi-organism reproductive process	biological_process	multi-organism process	1	45	35	9817	0.0285714	0.14878	0.352851
GO:0046983	protein dimerization activity	molecular_function	binding	5	83	593	17591	0.0084317	0.148306	0.352851
GO:1901659	glycosyl compound biosynthetic process	biological_process	metabolic process	1	45	35	9817	0.0285714	0.14878	0.352851
GO:0005509	calcium ion binding	molecular_function	binding	3	83	285	17591	0.0105263	0.151659	0.356783
GO:0016614	oxidoreductase activity, acting on CH-OH group of donors	molecular_function	catalytic activity	2	83	146	17591	0.0136986	0.151232	0.356783
GO:0009066	aspartate family amino acid metabolic process	biological_process	cellular process	1	45	36	9817	0.0277778	0.152696	0.356804
GO:0042325	regulation of phosphorylation	biological_process	biological regulation	1	45	36	9817	0.0277778	0.152696	0.356804
GO:0000096	sulfur amino acid metabolic process	biological_process	cellular process	1	45	37	9817	0.027027	0.156594	0.362254
GO:0006221	pyrimidine nucleotide biosynthetic process	biological_process	cellular process	1	45	37	9817	0.027027	0.156594	0.362254
GO:0007059	chromosome segregation	biological_process	cellular process	1	45	37	9817	0.027027	0.156594	0.362254
GO:0052689	carboxylic ester hydrolase activity	molecular_function	catalytic activity	2	83	150	17591	0.0133333	0.157813	0.36386
GO:0016049	cell growth	biological_process	cellular process	1	45	38	9817	0.0263158	0.160475	0.368773
GO:0005199	structural constituent of cell wall	molecular_function	structural molecule activity	1	83	38	17591	0.0263158	0.164655	0.373433
GO:0005976	polysaccharide metabolic process	biological_process	metabolic process	3	45	306	9817	0.00980392	0.164462	0.373433
GO:0006220	pyrimidine nucleotide metabolic process	biological_process	cellular process	1	45	39	9817	0.025641	0.164338	0.373433
GO:0071695	anatomical structure maturation	biological_process	developmental process	1	45	39	9817	0.025641	0.164338	0.373433
GO:0048856	anatomical structure development	biological_process	developmental process	4	45	469	9817	0.00852878	0.166368	0.376088
GO:0007049	cell cycle	biological_process	cellular process	2	45	161	9817	0.0124224	0.168112	0.376515
GO:0009772	photosynthetic electron transport in photosystem II	biological_process	cellular process	1	45	40	9817	0.025	0.168184	0.376515
GO:0051173	positive regulation of nitrogen compound metabolic process	biological_process	biological regulation	2	45	161	9817	0.0124224	0.168112	0.376515
GO:0007131	reciprocal meiotic recombination	biological_process	cellular component organization or biogenesis	1	45	41	9817	0.0243902	0.172012	0.377757
GO:0009055	electron transfer activity	molecular_function	catalytic activity	3	83	301	17591	0.00996678	0.16983	0.377757
GO:0009765	photosynthesis, light harvesting	biological_process	cellular process	1	45	41	9817	0.0243902	0.172012	0.377757
GO:0010604	positive regulation of macromolecule metabolic process	biological_process	biological regulation	2	45	162	9817	0.0123457	0.169741	0.377757
GO:0016787	hydrolase activity	molecular_function	catalytic activity	21	83	3613	17591	0.00581234	0.172549	0.377757
GO:0021700	developmental maturation	biological_process	developmental process	1	45	41	9817	0.0243902	0.172012	0.377757
GO:0035825	homologous recombination	biological_process	cellular process	1	45	41	9817	0.0243902	0.172012	0.377757
GO:0090558	plant epidermis development	biological_process	developmental process	1	45	42	9817	0.0238095	0.175824	0.382513
GO:1901136	carbohydrate derivative catabolic process	biological_process	metabolic process	1	45	42	9817	0.0238095	0.175824	0.382513
GO:0006004	fucose metabolic process	biological_process	metabolic process	1	45	43	9817	0.0232558	0.179618	0.387127
GO:0007127	meiosis I	biological_process	cellular component organization or biogenesis	1	45	43	9817	0.0232558	0.179618	0.387127
GO:0014070	response to organic cyclic compound	biological_process	response to stimulus	1	45	43	9817	0.0232558	0.179618	0.387127
GO:0006955	immune response	biological_process	response to stimulus	1	45	44	9817	0.0227273	0.183395	0.389223
GO:0031325	positive regulation of cellular metabolic process	biological_process	biological regulation	2	45	169	9817	0.0118343	0.181221	0.389223
GO:0045087	innate immune response	biological_process	response to stimulus	1	45	44	9817	0.0227273	0.183395	0.389223
GO:0051338	regulation of transferase activity	biological_process	biological regulation	1	45	44	9817	0.0227273	0.183395	0.389223
GO:1905392	plant organ morphogenesis	biological_process	multicellular organismal process	1	45	44	9817	0.0227273	0.183395	0.389223
GO:0030983	mismatched DNA binding	molecular_function	binding	1	83	43	17591	0.0232558	0.184221	0.389785
GO:0048589	developmental growth	biological_process	growth	1	45	45	9817	0.0222222	0.187155	0.392403
GO:0061982	meiosis I cell cycle process	biological_process	cellular process	1	45	45	9817	0.0222222	0.187155	0.392403
GO:0070011	peptidase activity, acting on L-amino acid peptides	molecular_function	catalytic activity	6	83	815	17591	0.00736196	0.186597	0.392403
GO:0005802	trans-Golgi network	cellular_component	organelle part	1	51	54	13066	0.0185185	0.190727	0.394061
GO:0006298	mismatch repair	biological_process	cellular process	1	45	46	9817	0.0217391	0.190898	0.394061
GO:0008094	DNA-dependent ATPase activity	molecular_function	catalytic activity	1	83	45	17591	0.0222222	0.19192	0.394061
GO:0009611	response to wounding	biological_process	response to stimulus	1	45	46	9817	0.0217391	0.190898	0.394061
GO:0071555	cell wall organization	biological_process	cellular component organization or biogenesis	3	45	330	9817	0.00909091	0.191888	0.394061
GO:0072657	protein localization to membrane	biological_process	localization	1	45	46	9817	0.0217391	0.190898	0.394061
GO:1901606	alpha-amino acid catabolic process	biological_process	cellular process	1	45	46	9817	0.0217391	0.190898	0.394061
GO:0000902	cell morphogenesis	biological_process	cellular component organization or biogenesis	1	45	47	9817	0.0212766	0.194624	0.396098
GO:0009893	positive regulation of metabolic process	biological_process	biological regulation	2	45	177	9817	0.0112994	0.194486	0.396098
GO:0048831	regulation of shoot system development	biological_process	biological regulation	1	45	47	9817	0.0212766	0.194624	0.396098
GO:0009063	cellular amino acid catabolic process	biological_process	cellular process	1	45	48	9817	0.0208333	0.198334	0.398967
GO:0009119	ribonucleoside metabolic process	biological_process	cellular process	1	45	48	9817	0.0208333	0.198334	0.398967
GO:0019220	regulation of phosphate metabolic process	biological_process	biological regulation	1	45	48	9817	0.0208333	0.198334	0.398967
GO:0051174	regulation of phosphorus metabolic process	biological_process	biological regulation	1	45	48	9817	0.0208333	0.198334	0.398967
GO:0002376	immune system process	biological_process	immune system process	1	45	50	9817	0.02	0.205703	0.399882
GO:0004620	phospholipase activity	molecular_function	catalytic activity	1	83	48	17591	0.0208333	0.203334	0.399882
GO:0008276	protein methyltransferase activity	molecular_function	catalytic activity	1	83	48	17591	0.0208333	0.203334	0.399882
GO:0009555	pollen development	biological_process	multicellular organismal process	1	45	50	9817	0.02	0.205703	0.399882
GO:0009607	response to biotic stimulus	biological_process	response to stimulus	2	45	181	9817	0.0110497	0.201167	0.399882
GO:0016740	transferase activity	molecular_function	catalytic activity	23	83	4094	17591	0.00561798	0.201537	0.399882
GO:0022900	electron transport chain	biological_process	cellular process	2	45	181	9817	0.0110497	0.201167	0.399882
GO:0032502	developmental process	biological_process	developmental process	4	45	511	9817	0.00782779	0.205254	0.399882
GO:0040007	growth	biological_process	growth	1	45	50	9817	0.02	0.205703	0.399882
GO:0045229	external encapsulating structure organization	biological_process	cellular component organization or biogenesis	3	45	339	9817	0.00884956	0.202472	0.399882
GO:0072528	pyrimidine-containing compound biosynthetic process	biological_process	cellular process	1	45	49	9817	0.0204082	0.202027	0.399882
GO:1903047	mitotic cell cycle process	biological_process	cellular process	1	45	50	9817	0.02	0.205703	0.399882
GO:0051020	GTPase binding	molecular_function	binding	1	83	49	17591	0.0204082	0.207103	0.40148
GO:0006575	cellular modified amino acid metabolic process	biological_process	cellular process	1	45	52	9817	0.0192308	0.213006	0.411771
GO:0016866	intramolecular transferase activity	molecular_function	catalytic activity	1	83	51	17591	0.0196078	0.214589	0.41368
GO:0010333	terpene synthase activity	molecular_function	catalytic activity	1	83	52	17591	0.0192308	0.218306	0.419679
GO:0004190	aspartic-type endopeptidase activity	molecular_function	catalytic activity	2	83	187	17591	0.0106952	0.220711	0.420806
GO:0070001	aspartic-type peptidase activity	molecular_function	catalytic activity	2	83	187	17591	0.0106952	0.220711	0.420806
GO:2000241	regulation of reproductive process	biological_process	biological regulation	1	45	54	9817	0.0185185	0.220243	0.420806
GO:0031399	regulation of protein modification process	biological_process	biological regulation	1	45	55	9817	0.0181818	0.223837	0.423277
GO:0072527	pyrimidine-containing compound metabolic process	biological_process	cellular process	1	45	55	9817	0.0181818	0.223837	0.423277
GO:0140013	meiotic nuclear division	biological_process	cellular component organization or biogenesis	1	45	55	9817	0.0181818	0.223837	0.423277
GO:0032989	cellular component morphogenesis	biological_process	cellular component organization or biogenesis	1	45	56	9817	0.0178571	0.227415	0.427712
GO:0043648	dicarboxylic acid metabolic process	biological_process	cellular process	1	45	56	9817	0.0178571	0.227415	0.427712
GO:0044281	small molecule metabolic process	biological_process	metabolic process	8	45	1283	9817	0.00623539	0.228277	0.428175
GO:0006418	tRNA aminoacylation for protein translation	biological_process	cellular process	1	45	58	9817	0.0172414	0.234522	0.438702
GO:0008170	N-methyltransferase activity	molecular_function	catalytic activity	1	83	57	17591	0.0175439	0.23663	0.440271
GO:0016838	carbon-oxygen lyase activity, acting on phosphates	molecular_function	catalytic activity	1	83	57	17591	0.0175439	0.23663	0.440271
GO:0046434	organophosphate catabolic process	biological_process	cellular process	1	45	59	9817	0.0169492	0.238052	0.441733
GO:0005543	phospholipid binding	molecular_function	binding	1	83	58	17591	0.0172414	0.240243	0.442339
GO:0022622	root system development	biological_process	multicellular organismal process	1	45	60	9817	0.0166667	0.241566	0.442339
GO:0032501	multicellular organismal process	biological_process	multicellular organismal process	4	45	546	9817	0.00732601	0.23959	0.442339
GO:0044464	cell part	cellular_component	cell	31	51	7171	13066	0.00432297	0.240498	0.442339
GO:0048364	root development	biological_process	multicellular organismal process	1	45	60	9817	0.0166667	0.241566	0.442339
GO:0004812	aminoacyl-tRNA ligase activity	molecular_function	catalytic activity	1	83	59	17591	0.0169492	0.24384	0.443421
GO:0005622	intracellular	cellular_component	cell	29	51	6676	13066	0.00434392	0.24693	0.443421
GO:0016875	ligase activity, forming carbon-oxygen bonds	molecular_function	catalytic activity	1	83	59	17591	0.0169492	0.24384	0.443421
GO:0043038	amino acid activation	biological_process	cellular process	1	45	62	9817	0.016129	0.248546	0.443421
GO:0043039	tRNA aminoacylation	biological_process	cellular process	1	45	62	9817	0.016129	0.248546	0.443421
GO:0044422	organelle part	cellular_component	organelle part	12	51	2472	13066	0.00485437	0.247104	0.443421
GO:0044424	intracellular part	cellular_component	cell	29	51	6675	13066	0.00434457	0.246583	0.443421
GO:0044446	intracellular organelle part	cellular_component	organelle part	12	51	2470	13066	0.0048583	0.246195	0.443421
GO:0048229	gametophyte development	biological_process	multicellular organismal process	1	45	61	9817	0.0163934	0.245064	0.443421
GO:1903046	meiotic cell cycle process	biological_process	cellular process	1	45	62	9817	0.016129	0.248546	0.443421
GO:0016491	oxidoreductase activity	molecular_function	catalytic activity	12	83	2036	17591	0.00589391	0.249371	0.443752
GO:0008233	peptidase activity	molecular_function	catalytic activity	6	83	903	17591	0.00664452	0.2532	0.448268
GO:0044085	cellular component biogenesis	biological_process	cellular component organization or biogenesis	4	45	559	9817	0.00715564	0.252701	0.448268
GO:0016620	oxidoreductase activity, acting on the aldehyde or oxo group of donors, NAD or NADP as acceptor	molecular_function	catalytic activity	1	83	62	17591	0.016129	0.254529	0.449474
GO:0000278	mitotic cell cycle	biological_process	cellular process	1	45	65	9817	0.0153846	0.258898	0.455274
GO:0016021	integral component of membrane	cellular_component	membrane part	30	51	6967	13066	0.00430601	0.259126	0.455274
GO:0000287	magnesium ion binding	molecular_function	binding	2	83	212	17591	0.00943396	0.264331	0.458162
GO:0005874	microtubule	cellular_component	organelle part	1	51	78	13066	0.0128205	0.26358	0.458162
GO:0016054	organic acid catabolic process	biological_process	cellular process	1	45	68	9817	0.0147059	0.269111	0.458162
GO:0016298	lipase activity	molecular_function	catalytic activity	1	83	64	17591	0.015625	0.261572	0.458162
GO:0016773	phosphotransferase activity, alcohol group as acceptor	molecular_function	catalytic activity	9	83	1489	17591	0.00604433	0.268061	0.458162
GO:0031224	intrinsic component of membrane	cellular_component	membrane part	30	51	6987	13066	0.00429369	0.266301	0.458162
GO:0031969	chloroplast membrane	cellular_component	organelle part	1	51	80	13066	0.0125	0.269352	0.458162
GO:0046395	carboxylic acid catabolic process	biological_process	cellular process	1	45	68	9817	0.0147059	0.269111	0.458162
GO:0048037	cofactor binding	molecular_function	binding	8	83	1296	17591	0.00617284	0.266755	0.458162
GO:0099080	supramolecular complex	cellular_component	supramolecular complex	1	51	80	13066	0.0125	0.269352	0.458162
GO:0099081	supramolecular polymer	cellular_component	supramolecular complex	1	51	80	13066	0.0125	0.269352	0.458162
GO:0099512	supramolecular fiber	cellular_component	supramolecular complex	1	51	80	13066	0.0125	0.269352	0.458162
GO:0099513	polymeric cytoskeletal fiber	cellular_component	organelle part	1	51	80	13066	0.0125	0.269352	0.458162
GO:0048522	positive regulation of cellular process	biological_process	biological regulation	2	45	222	9817	0.00900901	0.270778	0.458992
GO:0048580	regulation of post-embryonic development	biological_process	biological regulation	1	45	69	9817	0.0144928	0.272485	0.458992
GO:0051301	cell division	biological_process	cellular process	1	45	69	9817	0.0144928	0.272485	0.458992
GO:0051321	meiotic cell cycle	biological_process	cellular process	1	45	69	9817	0.0144928	0.272485	0.458992
GO:0016829	lyase activity	molecular_function	catalytic activity	3	83	389	17591	0.00771208	0.278253	0.466444
GO:0042170	plastid membrane	cellular_component	organelle part	1	51	83	13066	0.0120482	0.277927	0.466444
GO:0000280	nuclear division	biological_process	cellular component organization or biogenesis	1	45	72	9817	0.0138889	0.282515	0.471311
GO:0042742	defense response to bacterium	biological_process	multi-organism process	1	45	72	9817	0.0138889	0.282515	0.471311
GO:0071554	cell wall organization or biogenesis	biological_process	cellular process	3	45	405	9817	0.00740741	0.283561	0.471923
GO:0009116	nucleoside metabolic process	biological_process	cellular process	1	45	75	9817	0.0133333	0.29241	0.482024
GO:0009617	response to bacterium	biological_process	multi-organism process	1	45	75	9817	0.0133333	0.29241	0.482024
GO:0042445	hormone metabolic process	biological_process	biological regulation	1	45	75	9817	0.0133333	0.29241	0.482024
GO:0050790	regulation of catalytic activity	biological_process	biological regulation	1	45	75	9817	0.0133333	0.29241	0.482024
GO:0009250	glucan biosynthetic process	biological_process	cellular process	1	45	78	9817	0.0128205	0.302171	0.49576
GO:0045017	glycerolipid biosynthetic process	biological_process	cellular process	1	45	78	9817	0.0128205	0.302171	0.49576
GO:0015630	microtubule cytoskeleton	cellular_component	cell	1	51	93	13066	0.0107527	0.305805	0.50054
GO:0034404	nucleobase-containing small molecule biosynthetic process	biological_process	cellular process	1	45	81	9817	0.0123457	0.3118	0.509152
GO:0004672	protein kinase activity	molecular_function	catalytic activity	8	83	1363	17591	0.00586941	0.313472	0.510679
GO:0008299	isoprenoid biosynthetic process	biological_process	cellular process	1	45	82	9817	0.0121951	0.314981	0.511937
GO:0005623	cell	cellular_component	cell	31	51	7377	13066	0.00420225	0.316564	0.512285
GO:0009966	regulation of signal transduction	biological_process	biological regulation	1	45	83	9817	0.0120482	0.318148	0.512285
GO:0023051	regulation of signaling	biological_process	biological regulation	1	45	83	9817	0.0120482	0.318148	0.512285
GO:1901657	glycosyl compound metabolic process	biological_process	metabolic process	1	45	83	9817	0.0120482	0.318148	0.512285
GO:0010646	regulation of cell communication	biological_process	biological regulation	1	45	84	9817	0.0119048	0.3213	0.51497
GO:0032268	regulation of cellular protein metabolic process	biological_process	biological regulation	1	45	84	9817	0.0119048	0.3213	0.51497
GO:0030154	cell differentiation	biological_process	cellular process	1	45	85	9817	0.0117647	0.324438	0.518802
GO:0009888	tissue development	biological_process	developmental process	1	45	86	9817	0.0116279	0.327562	0.521394
GO:0065009	regulation of molecular function	biological_process	biological regulation	1	45	86	9817	0.0116279	0.327562	0.521394
GO:0071949	FAD binding	molecular_function	binding	1	83	84	17591	0.0119048	0.328485	0.521668
GO:0051726	regulation of cell cycle	biological_process	biological regulation	1	45	88	9817	0.0113636	0.333767	0.528845
GO:0006952	defense response	biological_process	response to stimulus	2	45	260	9817	0.00769231	0.335469	0.530331
GO:0044237	cellular metabolic process	biological_process	cellular process	24	45	4819	9817	0.00498029	0.336665	0.531012
GO:0044282	small molecule catabolic process	biological_process	metabolic process	1	45	91	9817	0.010989	0.34297	0.53973
GO:0016879	ligase activity, forming carbon-nitrogen bonds	molecular_function	catalytic activity	1	83	89	17591	0.011236	0.344255	0.540527
GO:0051246	regulation of protein metabolic process	biological_process	biological regulation	1	45	92	9817	0.0108696	0.34601	0.542056
GO:0140096	catalytic activity, acting on a protein	molecular_function	catalytic activity	15	83	2816	17591	0.0053267	0.347172	0.542652
GO:0016831	carboxy-lyase activity	molecular_function	catalytic activity	1	83	91	17591	0.010989	0.35046	0.544115
GO:0044238	primary metabolic process	biological_process	metabolic process	24	45	4846	9817	0.00495254	0.350345	0.544115
GO:2000026	regulation of multicellular organismal development	biological_process	biological regulation	1	45	93	9817	0.0107527	0.349036	0.544115
GO:0048285	organelle fission	biological_process	cellular component organization or biogenesis	1	45	94	9817	0.0106383	0.352048	0.545361
GO:0033692	cellular polysaccharide biosynthetic process	biological_process	cellular process	1	45	95	9817	0.0105263	0.355047	0.548781
GO:0016903	oxidoreductase activity, acting on the aldehyde or oxo group of donors	molecular_function	catalytic activity	1	83	93	17591	0.0107527	0.356607	0.549967
GO:0006720	isoprenoid metabolic process	biological_process	cellular process	1	45	97	9817	0.0103093	0.361004	0.555514
GO:0071944	cell periphery	cellular_component	cell	4	51	786	13066	0.00508906	0.368403	0.565646
GO:0051239	regulation of multicellular organismal process	biological_process	biological regulation	1	45	101	9817	0.00990099	0.372757	0.571068
GO:0022838	substrate-specific channel activity	molecular_function	transporter activity	1	83	99	17591	0.010101	0.374705	0.571528
GO:0048518	positive regulation of biological process	biological_process	biological regulation	2	45	283	9817	0.00706714	0.373952	0.571528
GO:0006629	lipid metabolic process	biological_process	metabolic process	4	45	676	9817	0.00591716	0.375596	0.571631
GO:0005515	protein binding	molecular_function	binding	7	83	1252	17591	0.00559105	0.378119	0.574211
GO:0009653	anatomical structure morphogenesis	biological_process	developmental process	1	45	104	9817	0.00961538	0.381433	0.57798
GO:0044430	cytoskeletal part	cellular_component	organelle part	1	51	124	13066	0.00806452	0.385688	0.583154
GO:0016758	transferase activity, transferring hexosyl groups	molecular_function	catalytic activity	3	83	480	17591	0.00625	0.395723	0.597026
GO:0016757	transferase activity, transferring glycosyl groups	molecular_function	catalytic activity	4	83	678	17591	0.00589971	0.398201	0.598163
GO:0019843	rRNA binding	molecular_function	binding	1	83	107	17591	0.00934579	0.398055	0.598163
GO:0000271	polysaccharide biosynthetic process	biological_process	metabolic process	1	45	111	9817	0.00900901	0.401223	0.601402
GO:0033993	response to lipid	biological_process	response to stimulus	1	45	117	9817	0.00854701	0.417692	0.624738
GO:0071704	organic substance metabolic process	biological_process	metabolic process	25	45	5193	9817	0.00481417	0.418727	0.624939
GO:0048869	cellular developmental process	biological_process	cellular process	1	45	119	9817	0.00840336	0.423083	0.628736
GO:0050793	regulation of developmental process	biological_process	biological regulation	1	45	119	9817	0.00840336	0.423083	0.628736
GO:0046486	glycerolipid metabolic process	biological_process	cellular process	1	45	122	9817	0.00819672	0.431077	0.638472
GO:0140101	catalytic activity, acting on a tRNA	molecular_function	catalytic activity	1	83	119	17591	0.00840336	0.431475	0.638472
GO:0005856	cytoskeleton	cellular_component	cell	1	51	148	13066	0.00675676	0.441276	0.647454
GO:0016301	kinase activity	molecular_function	catalytic activity	9	83	1744	17591	0.00516055	0.440976	0.647454
GO:0016830	carbon-carbon lyase activity	molecular_function	catalytic activity	1	83	122	17591	0.00819672	0.439539	0.647454
GO:0034637	cellular carbohydrate biosynthetic process	biological_process	cellular process	1	45	125	9817	0.008	0.438964	0.647454
GO:0030170	pyridoxal phosphate binding	molecular_function	binding	1	83	126	17591	0.00793651	0.450116	0.657643
GO:0070279	vitamin B6 binding	molecular_function	binding	1	83	126	17591	0.00793651	0.450116	0.657643
GO:0006399	tRNA metabolic process	biological_process	cellular process	1	45	131	9817	0.00763359	0.454417	0.659105
GO:0007017	microtubule-based process	biological_process	cellular process	1	45	131	9817	0.00763359	0.454417	0.659105
GO:0098791	Golgi subcompartment	cellular_component	organelle part	1	51	153	13066	0.00653595	0.45222	0.659105
GO:0140098	catalytic activity, acting on RNA	molecular_function	catalytic activity	3	83	527	17591	0.0056926	0.454915	0.659105
GO:0051213	dioxygenase activity	molecular_function	catalytic activity	1	83	129	17591	0.00775194	0.457919	0.662075
GO:0009201	ribonucleoside triphosphate biosynthetic process	biological_process	cellular process	1	45	135	9817	0.00740741	0.464486	0.670174
GO:0009856	pollination	biological_process	multi-organism process	1	45	136	9817	0.00735294	0.466975	0.670975
GO:0044706	multi-multicellular organism process	biological_process	multi-organism process	1	45	136	9817	0.00735294	0.466975	0.670975
GO:0009142	nucleoside triphosphate biosynthetic process	biological_process	cellular process	1	45	137	9817	0.00729927	0.469453	0.673141
GO:0099402	plant organ development	biological_process	multicellular organismal process	1	45	145	9817	0.00689655	0.488873	0.699542
GO:0009416	response to light stimulus	biological_process	response to stimulus	1	45	152	9817	0.00657895	0.505294	0.720832
GO:0044431	Golgi apparatus part	cellular_component	organelle part	1	51	179	13066	0.00558659	0.505829	0.720832
GO:0008610	lipid biosynthetic process	biological_process	metabolic process	2	45	368	9817	0.00543478	0.507239	0.721361
GO:0003723	RNA binding	molecular_function	binding	5	83	1002	17591	0.00499002	0.514749	0.729052
GO:0009314	response to radiation	biological_process	response to stimulus	1	45	156	9817	0.00641026	0.514445	0.729052
GO:0006950	response to stress	biological_process	response to stimulus	5	45	1030	9817	0.00485437	0.517004	0.729269
GO:0016835	carbon-oxygen lyase activity	molecular_function	catalytic activity	1	83	153	17591	0.00653595	0.516529	0.729269
GO:0050660	flavin adenine dinucleotide binding	molecular_function	binding	1	83	155	17591	0.00645161	0.52112	0.733585
GO:0006790	sulfur compound metabolic process	biological_process	cellular process	1	45	162	9817	0.00617284	0.527861	0.74157
GO:0051641	cellular localization	biological_process	localization	2	45	387	9817	0.00516796	0.534577	0.749487
GO:0016051	carbohydrate biosynthetic process	biological_process	metabolic process	1	45	167	9817	0.00598802	0.538764	0.752318
GO:0048583	regulation of response to stimulus	biological_process	biological regulation	1	45	167	9817	0.00598802	0.538764	0.752318
GO:0043168	anion binding	molecular_function	binding	19	83	4023	17591	0.00472284	0.540916	0.753807
GO:0003700	DNA-binding transcription factor activity	molecular_function	transcription regulator activity	3	83	604	17591	0.00496689	0.5463	0.755244
GO:0005506	iron ion binding	molecular_function	binding	2	83	385	17591	0.00519481	0.545301	0.755244
GO:0022607	cellular component assembly	biological_process	cellular component organization or biogenesis	2	45	394	9817	0.00507614	0.544396	0.755244
GO:0043229	intracellular organelle	cellular_component	cell	23	51	5872	13066	0.00391689	0.545204	0.755244
GO:0043226	organelle	cellular_component	organelle	23	51	5878	13066	0.0039129	0.547833	0.755857
GO:0000166	nucleotide binding	molecular_function	binding	18	83	3832	17591	0.00469729	0.551743	0.757575
GO:0005198	structural molecule activity	molecular_function	structural molecule activity	3	83	613	17591	0.00489396	0.556413	0.757575
GO:0006732	coenzyme metabolic process	biological_process	cellular process	1	45	176	9817	0.00568182	0.557772	0.757575
GO:0015980	energy derivation by oxidation of organic compounds	biological_process	cellular process	1	45	175	9817	0.00571429	0.555698	0.757575
GO:0019842	vitamin binding	molecular_function	binding	1	83	170	17591	0.00588235	0.554211	0.757575
GO:0036094	small molecule binding	molecular_function	binding	19	83	4056	17591	0.00468442	0.557051	0.757575
GO:0098805	whole membrane	cellular_component	membrane	1	51	207	13066	0.00483092	0.557811	0.757575
GO:1901265	nucleoside phosphate binding	molecular_function	binding	18	83	3832	17591	0.00469729	0.551743	0.757575
GO:0009260	ribonucleotide biosynthetic process	biological_process	cellular process	1	45	179	9817	0.00558659	0.563936	0.762908
GO:0046390	ribose phosphate biosynthetic process	biological_process	cellular process	1	45	179	9817	0.00558659	0.563936	0.762908
GO:0006310	DNA recombination	biological_process	cellular process	1	45	181	9817	0.00552486	0.567999	0.766141
GO:0008144	drug binding	molecular_function	binding	14	83	3009	17591	0.00465271	0.568534	0.766141
GO:0004674	protein serine/threonine kinase activity	molecular_function	catalytic activity	3	83	632	17591	0.00474684	0.577327	0.776327
GO:0043565	sequence-specific DNA binding	molecular_function	binding	2	83	409	17591	0.00488998	0.57833	0.776327
GO:0005524	ATP binding	molecular_function	binding	13	83	2830	17591	0.00459364	0.588301	0.786668
GO:0050896	response to stimulus	biological_process	response to stimulus	8	45	1783	9817	0.00448682	0.587554	0.786668
GO:0003924	GTPase activity	molecular_function	catalytic activity	1	83	189	17591	0.00529101	0.5929	0.791293
GO:0008289	lipid binding	molecular_function	binding	1	83	196	17591	0.00510204	0.606301	0.807625
GO:0044255	cellular lipid metabolic process	biological_process	cellular process	2	45	443	9817	0.00451467	0.609188	0.809917
GO:0004175	endopeptidase activity	molecular_function	catalytic activity	2	83	434	17591	0.00460829	0.610869	0.810599
GO:0006979	response to oxidative stress	biological_process	response to stimulus	1	45	210	9817	0.0047619	0.62291	0.81875
GO:0035639	purine ribonucleoside triphosphate binding	molecular_function	binding	14	83	3106	17591	0.00450741	0.619834	0.81875
GO:0043227	membrane-bounded organelle	cellular_component	organelle	20	51	5282	13066	0.00378644	0.62196	0.81875
GO:0065008	regulation of biological quality	biological_process	biological regulation	2	45	454	9817	0.00440529	0.622773	0.81875
GO:0140110	transcription regulator activity	molecular_function	transcription regulator activity	3	83	671	17591	0.00447094	0.618324	0.81875
GO:0034660	ncRNA metabolic process	biological_process	cellular process	1	45	213	9817	0.00469484	0.628185	0.824122
GO:0008104	protein localization	biological_process	localization	2	45	462	9817	0.004329	0.63243	0.828125
GO:0005840	ribosome	cellular_component	cell	2	51	550	13066	0.00363636	0.639006	0.83516
GO:0043167	ion binding	molecular_function	binding	31	83	6825	17591	0.00454212	0.646874	0.843854
GO:0005794	Golgi apparatus	cellular_component	cell	1	51	265	13066	0.00377358	0.649019	0.845064
GO:0043603	cellular amide metabolic process	biological_process	cellular process	3	45	720	9817	0.00416667	0.651191	0.846305
GO:0009165	nucleotide biosynthetic process	biological_process	cellular process	1	45	228	9817	0.00438596	0.653495	0.847712
GO:1901293	nucleoside phosphate biosynthetic process	biological_process	cellular process	1	45	230	9817	0.00434783	0.65674	0.850331
GO:0016772	transferase activity, transferring phosphorus-containing groups	molecular_function	catalytic activity	9	83	2079	17591	0.004329	0.659225	0.851959
GO:0009199	ribonucleoside triphosphate metabolic process	biological_process	cellular process	1	45	235	9817	0.00425532	0.664722	0.857467
GO:0005886	plasma membrane	cellular_component	cell	2	51	592	13066	0.00337838	0.679143	0.872499
GO:0009141	nucleoside triphosphate metabolic process	biological_process	cellular process	1	45	245	9817	0.00408163	0.680147	0.872499
GO:0016874	ligase activity	molecular_function	catalytic activity	2	83	491	17591	0.00407332	0.677934	0.872499
GO:0016788	hydrolase activity, acting on ester bonds	molecular_function	catalytic activity	4	83	975	17591	0.00410256	0.682407	0.873783
GO:0098588	bounding membrane of organelle	cellular_component	organelle part	1	51	295	13066	0.00338983	0.688675	0.880186
GO:0016791	phosphatase activity	molecular_function	catalytic activity	1	83	249	17591	0.00401606	0.694573	0.886091
GO:0043231	intracellular membrane-bounded organelle	cellular_component	cell	19	51	5205	13066	0.00365034	0.695954	0.886224
GO:0016853	isomerase activity	molecular_function	catalytic activity	1	83	251	17591	0.00398406	0.697489	0.886552
GO:1901700	response to oxygen-containing compound	biological_process	response to stimulus	1	45	262	9817	0.00381679	0.70479	0.894194
GO:0032787	monocarboxylic acid metabolic process	biological_process	cellular process	1	45	263	9817	0.00380228	0.70618	0.894323
GO:0016043	cellular component organization	biological_process	cellular component organization or biogenesis	5	45	1270	9817	0.00393701	0.708855	0.896076
GO:0008270	zinc ion binding	molecular_function	binding	4	83	1015	17591	0.00394089	0.712843	0.899478
GO:0005488	binding	molecular_function	binding	50	83	11029	17591	0.0045335	0.720223	0.901647
GO:0005829	cytosol	cellular_component	cell	1	51	322	13066	0.00310559	0.720588	0.901647
GO:0016192	vesicle-mediated transport	biological_process	localization	1	45	271	9817	0.00369004	0.717075	0.901647
GO:0034622	cellular protein-containing complex assembly	biological_process	cellular component organization or biogenesis	1	45	272	9817	0.00367647	0.718409	0.901647
GO:0051276	chromosome organization	biological_process	cellular component organization or biogenesis	1	45	274	9817	0.00364964	0.721058	0.901647
GO:0001883	purine nucleoside binding	molecular_function	binding	1	83	278	17591	0.00359712	0.734273	0.905125
GO:0005525	GTP binding	molecular_function	binding	1	83	278	17591	0.00359712	0.734273	0.905125
GO:0006281	DNA repair	biological_process	cellular process	1	45	278	9817	0.00359712	0.726283	0.905125
GO:0008234	cysteine-type peptidase activity	molecular_function	catalytic activity	1	83	278	17591	0.00359712	0.734273	0.905125
GO:0019001	guanyl nucleotide binding	molecular_function	binding	1	83	278	17591	0.00359712	0.734273	0.905125
GO:0032550	purine ribonucleoside binding	molecular_function	binding	1	83	278	17591	0.00359712	0.734273	0.905125
GO:0032561	guanyl ribonucleotide binding	molecular_function	binding	1	83	278	17591	0.00359712	0.734273	0.905125
GO:0033036	macromolecule localization	biological_process	localization	2	45	556	9817	0.00359712	0.732189	0.905125
GO:0012505	endomembrane system	cellular_component	cell	2	51	660	13066	0.0030303	0.736539	0.906309
GO:1901564	organonitrogen compound metabolic process	biological_process	metabolic process	9	45	2262	9817	0.00397878	0.74026	0.909275
GO:0006464	cellular protein modification process	biological_process	cellular process	2	45	570	9817	0.00350877	0.744968	0.910311
GO:0006974	cellular response to DNA damage stimulus	biological_process	cellular process	1	45	293	9817	0.00341297	0.745038	0.910311
GO:0036211	protein modification process	biological_process	metabolic process	2	45	570	9817	0.00350877	0.744968	0.910311
GO:0001882	nucleoside binding	molecular_function	binding	1	83	302	17591	0.00331126	0.763237	0.911712
GO:0009259	ribonucleotide metabolic process	biological_process	cellular process	1	45	302	9817	0.00331126	0.755682	0.911712
GO:0019637	organophosphate metabolic process	biological_process	cellular process	2	45	576	9817	0.00347222	0.750287	0.911712
GO:0030554	adenyl nucleotide binding	molecular_function	binding	13	83	3195	17591	0.00406886	0.76443	0.911712
GO:0032549	ribonucleoside binding	molecular_function	binding	1	83	301	17591	0.00332226	0.762095	0.911712
GO:0032559	adenyl ribonucleotide binding	molecular_function	binding	13	83	3190	17591	0.00407524	0.762392	0.911712
GO:0034613	cellular protein localization	biological_process	localization	1	45	305	9817	0.00327869	0.759132	0.911712
GO:0042578	phosphoric ester hydrolase activity	molecular_function	catalytic activity	1	83	301	17591	0.00332226	0.762095	0.911712
GO:0042623	ATPase activity, coupled	molecular_function	catalytic activity	1	83	300	17591	0.00333333	0.760948	0.911712
GO:0046906	tetrapyrrole binding	molecular_function	binding	2	83	568	17591	0.00352113	0.75346	0.911712
GO:0046914	transition metal ion binding	molecular_function	binding	6	83	1548	17591	0.00387597	0.749402	0.911712
GO:0065003	protein-containing complex assembly	biological_process	cellular component organization or biogenesis	1	45	306	9817	0.00326797	0.760272	0.911712
GO:0070727	cellular macromolecule localization	biological_process	localization	1	45	308	9817	0.00324675	0.762535	0.911712
GO:1901565	organonitrogen compound catabolic process	biological_process	metabolic process	1	45	311	9817	0.00321543	0.765891	0.911712
GO:1990904	ribonucleoprotein complex	cellular_component	protein-containing complex	2	51	698	13066	0.00286533	0.764744	0.911712
GO:0006412	translation	biological_process	cellular process	2	45	604	9817	0.00331126	0.773904	0.914504
GO:0017076	purine nucleotide binding	molecular_function	binding	14	83	3471	17591	0.00403342	0.783806	0.914504
GO:0019538	protein metabolic process	biological_process	metabolic process	5	45	1370	9817	0.00364964	0.771966	0.914504
GO:0019693	ribose phosphate metabolic process	biological_process	cellular process	1	45	328	9817	0.00304878	0.784049	0.914504
GO:0030246	carbohydrate binding	molecular_function	binding	1	83	321	17591	0.00311526	0.783935	0.914504
GO:0032555	purine ribonucleotide binding	molecular_function	binding	14	83	3465	17591	0.0040404	0.781548	0.914504
GO:0043043	peptide biosynthetic process	biological_process	cellular process	2	45	606	9817	0.00330033	0.775516	0.914504
GO:0043228	non-membrane-bounded organelle	cellular_component	organelle	3	51	1037	13066	0.00289296	0.781377	0.914504
GO:0043232	intracellular non-membrane-bounded organelle	cellular_component	cell	3	51	1037	13066	0.00289296	0.781377	0.914504
GO:0043933	protein-containing complex subunit organization	biological_process	cellular component organization or biogenesis	1	45	326	9817	0.00306748	0.781986	0.914504
GO:0046907	intracellular transport	biological_process	localization	1	45	328	9817	0.00304878	0.784049	0.914504
GO:0071840	cellular component organization or biogenesis	biological_process	cellular component organization or biogenesis	5	45	1385	9817	0.00361011	0.780519	0.914504
GO:0006518	peptide metabolic process	biological_process	cellular process	2	45	629	9817	0.00317965	0.793369	0.920251
GO:0032553	ribonucleotide binding	molecular_function	binding	14	83	3502	17591	0.00399772	0.795227	0.920251
GO:0051649	establishment of localization in cell	biological_process	localization	1	45	339	9817	0.00294985	0.795056	0.920251
GO:0090407	organophosphate biosynthetic process	biological_process	cellular process	1	45	338	9817	0.00295858	0.794079	0.920251
GO:1901135	carbohydrate derivative metabolic process	biological_process	metabolic process	2	45	632	9817	0.00316456	0.795606	0.920251
GO:0009719	response to endogenous stimulus	biological_process	response to stimulus	1	45	354	9817	0.00282486	0.809187	0.928458
GO:0009725	response to hormone	biological_process	response to stimulus	1	45	354	9817	0.00282486	0.809187	0.928458
GO:0043169	cation binding	molecular_function	binding	13	83	3300	17591	0.00393939	0.804617	0.928458
GO:0043604	amide biosynthetic process	biological_process	cellular process	2	45	646	9817	0.00309598	0.805772	0.928458
GO:0098772	molecular function regulator	molecular_function	molecular function regulator	1	83	347	17591	0.00288184	0.80939	0.928458
GO:0016705	oxidoreductase activity, acting on paired donors, with incorporation or reduction of molecular oxygen	molecular_function	catalytic activity	1	83	350	17591	0.00285714	0.812129	0.930063
GO:0097367	carbohydrate derivative binding	molecular_function	binding	14	83	3563	17591	0.00392927	0.816493	0.933519
GO:0051171	regulation of nitrogen compound metabolic process	biological_process	biological regulation	3	45	941	9817	0.0031881	0.819274	0.935158
GO:0043412	macromolecule modification	biological_process	metabolic process	2	45	669	9817	0.00298954	0.821527	0.93619
GO:0051186	cofactor metabolic process	biological_process	cellular process	1	45	370	9817	0.0027027	0.823209	0.936569
GO:0006796	phosphate-containing compound metabolic process	biological_process	cellular process	2	45	675	9817	0.00296296	0.82545	0.937582
GO:0006793	phosphorus metabolic process	biological_process	cellular process	2	45	685	9817	0.00291971	0.831821	0.938673
GO:0009628	response to abiotic stimulus	biological_process	response to stimulus	1	45	379	9817	0.00263852	0.830649	0.938673
GO:0080090	regulation of primary metabolic process	biological_process	biological regulation	3	45	963	9817	0.00311526	0.831633	0.938673
GO:1901137	carbohydrate derivative biosynthetic process	biological_process	metabolic process	1	45	377	9817	0.00265252	0.829022	0.938673
GO:0009117	nucleotide metabolic process	biological_process	cellular process	1	45	386	9817	0.00259067	0.836222	0.941198
GO:1901575	organic substance catabolic process	biological_process	metabolic process	2	45	693	9817	0.002886	0.836771	0.941198
GO:0006753	nucleoside phosphate metabolic process	biological_process	cellular process	1	45	390	9817	0.0025641	0.839326	0.942544
GO:0033554	cellular response to stress	biological_process	cellular process	1	45	395	9817	0.00253165	0.843126	0.945281
GO:0010033	response to organic substance	biological_process	response to stimulus	1	45	400	9817	0.0025	0.846837	0.947911
GO:0031323	regulation of cellular metabolic process	biological_process	biological regulation	3	45	998	9817	0.00300601	0.849849	0.949751
GO:0044267	cellular protein metabolic process	biological_process	cellular process	4	45	1309	9817	0.00305577	0.868008	0.968485
GO:0015031	protein transport	biological_process	localization	1	45	440	9817	0.00227273	0.873594	0.972214
GO:0046872	metal ion binding	molecular_function	binding	12	83	3290	17591	0.00364742	0.874152	0.972214
GO:0045184	establishment of protein localization	biological_process	localization	1	45	445	9817	0.00224719	0.876598	0.973375
GO:0003735	structural constituent of ribosome	molecular_function	structural molecule activity	1	83	500	17591	0.002	0.909193	0.976867
GO:0006355	regulation of transcription, DNA-templated	biological_process	biological regulation	2	45	805	9817	0.00248447	0.893743	0.976867
GO:0006396	RNA processing	biological_process	cellular process	1	45	467	9817	0.00214133	0.88901	0.976867
GO:0009056	catabolic process	biological_process	metabolic process	2	45	831	9817	0.00240674	0.904088	0.976867
GO:0010556	regulation of macromolecule biosynthetic process	biological_process	biological regulation	2	45	853	9817	0.00234467	0.912118	0.976867
GO:0015318	inorganic molecular entity transmembrane transporter activity	molecular_function	transporter activity	1	83	489	17591	0.00204499	0.904199	0.976867
GO:0015833	peptide transport	biological_process	localization	1	45	480	9817	0.00208333	0.895762	0.976867
GO:0016887	ATPase activity	molecular_function	catalytic activity	1	83	455	17591	0.0021978	0.886986	0.976867
GO:0019219	regulation of nucleobase-containing compound metabolic process	biological_process	biological regulation	2	45	850	9817	0.00235294	0.91106	0.976867
GO:0022857	transmembrane transporter activity	molecular_function	transporter activity	3	83	1135	17591	0.00264317	0.910176	0.976867
GO:0031090	organelle membrane	cellular_component	organelle part	1	51	554	13066	0.00180505	0.890729	0.976867
GO:0042886	amide transport	biological_process	localization	1	45	481	9817	0.002079	0.896264	0.976867
GO:0044260	cellular macromolecule metabolic process	biological_process	cellular process	8	45	2458	9817	0.00325468	0.907338	0.976867
GO:0044283	small molecule biosynthetic process	biological_process	metabolic process	1	45	477	9817	0.00209644	0.89424	0.976867
GO:0051252	regulation of RNA metabolic process	biological_process	biological regulation	2	45	817	9817	0.00244798	0.898637	0.976867
GO:0055086	nucleobase-containing small molecule metabolic process	biological_process	cellular process	1	45	454	9817	0.00220264	0.881832	0.976867
GO:0060255	regulation of macromolecule metabolic process	biological_process	biological regulation	3	45	1116	9817	0.00268817	0.899513	0.976867
GO:0071705	nitrogen compound transport	biological_process	localization	1	45	513	9817	0.00194932	0.911148	0.976867
GO:0097159	organic cyclic compound binding	molecular_function	binding	32	83	7960	17591	0.0040201	0.910357	0.976867
GO:1901363	heterocyclic compound binding	molecular_function	binding	32	83	7959	17591	0.00402061	0.910188	0.976867
GO:1903506	regulation of nucleic acid-templated transcription	biological_process	biological regulation	2	45	805	9817	0.00248447	0.893743	0.976867
GO:2000112	regulation of cellular macromolecule biosynthetic process	biological_process	biological regulation	2	45	853	9817	0.00234467	0.912118	0.976867
GO:2001141	regulation of RNA biosynthetic process	biological_process	biological regulation	2	45	805	9817	0.00248447	0.893743	0.976867
GO:0016070	RNA metabolic process	biological_process	cellular process	2	45	863	9817	0.0023175	0.915562	0.979044
GO:0009889	regulation of biosynthetic process	biological_process	biological regulation	2	45	878	9817	0.0022779	0.920497	0.979958
GO:0019222	regulation of metabolic process	biological_process	biological regulation	3	45	1186	9817	0.00252951	0.921655	0.979958
GO:0031326	regulation of cellular biosynthetic process	biological_process	biological regulation	2	45	877	9817	0.0022805	0.920176	0.979958
GO:0034654	nucleobase-containing compound biosynthetic process	biological_process	cellular process	1	45	540	9817	0.00185185	0.922064	0.979958
GO:0034645	cellular macromolecule biosynthetic process	biological_process	cellular process	3	45	1210	9817	0.00247934	0.928187	0.983453
GO:0042221	response to chemical	biological_process	response to stimulus	1	45	553	9817	0.00180832	0.926841	0.983453
GO:0003676	nucleic acid binding	molecular_function	binding	13	83	3846	17591	0.00338014	0.93841	0.983668
GO:0005215	transporter activity	molecular_function	transporter activity	3	83	1228	17591	0.002443	0.935418	0.983668
GO:0009059	macromolecule biosynthetic process	biological_process	metabolic process	3	45	1231	9817	0.00243704	0.933502	0.983668
GO:0009987	cellular process	biological_process	cellular process	26	45	6641	9817	0.00391507	0.94023	0.983668
GO:0017111	nucleoside-triphosphatase activity	molecular_function	catalytic activity	2	83	929	17591	0.00215285	0.938108	0.983668
GO:0043170	macromolecule metabolic process	biological_process	metabolic process	10	45	3083	9817	0.00324359	0.936044	0.983668
GO:0044249	cellular biosynthetic process	biological_process	cellular process	6	45	2089	9817	0.00287219	0.938753	0.983668
GO:0044271	cellular nitrogen compound biosynthetic process	biological_process	cellular process	3	45	1260	9817	0.00238095	0.940264	0.983668
GO:1901566	organonitrogen compound biosynthetic process	biological_process	metabolic process	3	45	1264	9817	0.00237342	0.941146	0.983668
GO:0006259	DNA metabolic process	biological_process	cellular process	1	45	650	9817	0.00153846	0.954494	0.985635
GO:0006996	organelle organization	biological_process	cellular component organization or biogenesis	1	45	673	9817	0.00148588	0.95937	0.985635
GO:0010467	gene expression	biological_process	metabolic process	3	45	1366	9817	0.00219619	0.960041	0.985635
GO:0010468	regulation of gene expression	biological_process	biological regulation	2	45	1018	9817	0.00196464	0.955329	0.985635
GO:0016462	pyrophosphatase activity	molecular_function	catalytic activity	2	83	963	17591	0.00207684	0.946117	0.985635
GO:0016817	hydrolase activity, acting on acid anhydrides	molecular_function	catalytic activity	2	83	979	17591	0.0020429	0.94954	0.985635
GO:0016818	hydrolase activity, acting on acid anhydrides, in phosphorus-containing anhydrides	molecular_function	catalytic activity	2	83	969	17591	0.00206398	0.947426	0.985635
GO:0018130	heterocycle biosynthetic process	biological_process	cellular process	1	45	655	9817	0.00152672	0.955601	0.985635
GO:0019438	aromatic compound biosynthetic process	biological_process	cellular process	1	45	668	9817	0.00149701	0.958355	0.985635
GO:0050794	regulation of cellular process	biological_process	biological regulation	4	45	1685	9817	0.00237389	0.962911	0.985635
GO:0051179	localization	biological_process	localization	3	45	1291	9817	0.00232378	0.946805	0.985635
GO:0065007	biological regulation	biological_process	biological regulation	6	45	2241	9817	0.00267738	0.962577	0.985635
GO:0071702	organic substance transport	biological_process	localization	1	45	685	9817	0.00145985	0.961707	0.985635
GO:1901576	organic substance biosynthetic process	biological_process	metabolic process	6	45	2175	9817	0.00275862	0.953462	0.985635
GO:0003677	DNA binding	molecular_function	binding	5	83	2021	17591	0.00247402	0.968708	0.985752
GO:0009058	biosynthetic process	biological_process	metabolic process	6	45	2281	9817	0.00263043	0.967306	0.985752
GO:0044248	cellular catabolic process	biological_process	cellular process	1	45	712	9817	0.00140449	0.966494	0.985752
GO:0050789	regulation of biological process	biological_process	biological regulation	5	45	1997	9817	0.00250376	0.966284	0.985752
GO:1901362	organic cyclic compound biosynthetic process	biological_process	metabolic process	1	45	742	9817	0.00134771	0.971129	0.986769
GO:0006139	nucleobase-containing compound metabolic process	biological_process	cellular process	4	45	1949	9817	0.00205233	0.986506	0.989357
GO:0006725	cellular aromatic compound metabolic process	biological_process	cellular process	5	45	2170	9817	0.00230415	0.982032	0.989357
GO:0006807	nitrogen compound metabolic process	biological_process	metabolic process	11	45	3690	9817	0.00298103	0.97891	0.989357
GO:0006810	transport	biological_process	localization	2	45	1253	9817	0.00159617	0.9839	0.989357
GO:0046483	heterocycle metabolic process	biological_process	cellular process	5	45	2107	9817	0.00237304	0.977297	0.989357
GO:0051234	establishment of localization	biological_process	localization	2	45	1264	9817	0.00158228	0.984674	0.989357
GO:0051716	cellular response to stimulus	biological_process	cellular process	1	45	880	9817	0.00113636	0.985537	0.989357
GO:0090304	nucleic acid metabolic process	biological_process	cellular process	3	45	1498	9817	0.00200267	0.976289	0.989357
GO:1901360	organic cyclic compound metabolic process	biological_process	metabolic process	5	45	2225	9817	0.00224719	0.985415	0.989357
GO:0034641	cellular nitrogen compound metabolic process	biological_process	cellular process	6	45	2676	9817	0.00224215	0.992349	0.993781
GO:0005634	nucleus	cellular_component	cell	4	51	2680	13066	0.00149254	0.996288	0.996288

## Sheet: 128 meht-DEGs
Gene ID	GO Term	Level 2
Solyc01g005000.2	[P]GO:1901564//organonitrogen compound metabolic process;GO:0071704//organic substance metabolic process;GO:0006082//organic acid metabolic process;GO:0044281//small molecule metabolic process;GO:0009056//catabolic process;GO:0006807//nitrogen compound metabolic process;GO:0006536//glutamate metabolic process;GO:0044237//cellular metabolic process;GO:0043649//dicarboxylic acid catabolic process;G…	[C]cell;[P]cellular process;metabolic process;[F]catalytic activity;binding;
Solyc01g005280.2
Solyc01g056850.2	[P]GO:0006793//phosphorus metabolic process;GO:0006221//pyrimidine nucleotide biosynthetic process;GO:1901657//glycosyl compound metabolic process;GO:0042455//ribonucleoside biosynthetic process;GO:0044271//cellular nitrogen compound biosynthetic process;GO:0019752//carboxylic acid metabolic process;GO:0006807//nitrogen compound metabolic process;GO:0009117//nucleotide metabolic process;GO:003465…	[P]metabolic process;cellular process;[F]catalytic activity;binding;
Solyc01g067510.2	[C]GO:0031224//intrinsic component of membrane;GO:0016021//integral component of membrane;GO:0016020//membrane;GO:0044425//membrane part;[F]GO:0004672//protein kinase activity;GO:0005488//binding;GO:1901265//nucleoside phosphate binding;GO:0005524//ATP binding;GO:0043167//ion binding;GO:0016740//transferase activity;GO:0008144//drug binding;GO:0043168//anion binding;GO:0016772//transferase activi…	[C]membrane;membrane part;[F]catalytic activity;binding;
Solyc01g068540.2	[F]GO:0003677//DNA binding;GO:1901363//heterocyclic compound binding;GO:0005488//binding;GO:0003676//nucleic acid binding;GO:0097159//organic cyclic compound binding;	[F]binding;
Solyc01g080010.2	[F]GO:0003824//catalytic activity;GO:0004190//aspartic-type endopeptidase activity;GO:0140096//catalytic activity, acting on a protein;GO:0016787//hydrolase activity;GO:0004175//endopeptidase activity;GO:0070001//aspartic-type peptidase activity;GO:0070011//peptidase activity, acting on L-amino acid peptides;GO:0008233//peptidase activity;	[F]catalytic activity;
Solyc01g080810.2	[P]GO:1901360//organic cyclic compound metabolic process;GO:0044281//small molecule metabolic process;GO:0006807//nitrogen compound metabolic process;GO:0019538//protein metabolic process;GO:0006412//translation;GO:0010467//gene expression;GO:0006139//nucleobase-containing compound metabolic process;GO:0043039//tRNA aminoacylation;GO:0046483//heterocycle metabolic process;GO:0044267//cellular pro…	[P]cellular process;metabolic process;[F]binding;catalytic activity;
Solyc01g086900.2	[P]GO:0006139//nucleobase-containing compound metabolic process;GO:0006725//cellular aromatic compound metabolic process;GO:0006807//nitrogen compound metabolic process;GO:1901360//organic cyclic compound metabolic process;GO:0010467//gene expression;GO:0006396//RNA processing;GO:0071704//organic substance metabolic process;GO:0009987//cellular process;GO:0034641//cellular nitrogen compound metab…	[P]metabolic process;cellular process;[F]binding;catalytic activity;
Solyc01g091800.2	[F]GO:0097159//organic cyclic compound binding;GO:0008173//RNA methyltransferase activity;GO:0005488//binding;GO:0003676//nucleic acid binding;GO:0008757//S-adenosylmethionine-dependent methyltransferase activity;GO:1901363//heterocyclic compound binding;GO:0016740//transferase activity;GO:0008168//methyltransferase activity;GO:0140102//catalytic activity, acting on a rRNA;GO:0000179//rRNA (adeni…	[F]binding;catalytic activity;
Solyc01g098740.2	[C]GO:0044425//membrane part;GO:0016020//membrane;GO:0016021//integral component of membrane;GO:0031224//intrinsic component of membrane;[F]GO:0097159//organic cyclic compound binding;GO:1901363//heterocyclic compound binding;GO:0004672//protein kinase activity;GO:0097367//carbohydrate derivative binding;GO:0032555//purine ribonucleotide binding;GO:0030554//adenyl nucleotide binding;GO:0003824//c…	[C]membrane part;membrane;[F]binding;catalytic activity;
Solyc01g099630.2	[P]GO:0009987//cellular process;GO:0042546//cell wall biogenesis;GO:0043170//macromolecule metabolic process;GO:0044237//cellular metabolic process;GO:0045229//external encapsulating structure organization;GO:0044042//glucan metabolic process;GO:0010383//cell wall polysaccharide metabolic process;GO:0044262//cellular carbohydrate metabolic process;GO:0071840//cellular component organization or bi…	[C]membrane part;extracellular region;membrane;cell;[P]cellular component organization or biogenesis;cellular process;metabolic process;[F]catalytic activity;
Solyc01g100530.2	[P]GO:0051179//localization;GO:0072657//protein localization to membrane;GO:1990778//protein localization to cell periphery;GO:0033036//macromolecule localization;GO:0051641//cellular localization;GO:0072659//protein localization to plasma membrane;GO:0008104//protein localization;GO:0034613//cellular protein localization;GO:0070727//cellular macromolecule localization;	[P]localization;
Solyc01g102950.2
Solyc01g105920.2	[F]GO:0000287//magnesium ion binding;GO:0043169//cation binding;GO:0016829//lyase activity;GO:0003824//catalytic activity;GO:0046872//metal ion binding;GO:0043167//ion binding;GO:0016838//carbon-oxygen lyase activity, acting on phosphates;GO:0005488//binding;GO:0010333//terpene synthase activity;GO:0016835//carbon-oxygen lyase activity;	[F]binding;catalytic activity;
Solyc01g107340.2	[F]GO:0005198//structural molecule activity;GO:0005199//structural constituent of cell wall;	[F]structural molecule activity;
Solyc02g014830.2	[F]GO:0008238//exopeptidase activity;GO:0016787//hydrolase activity;GO:0017171//serine hydrolase activity;GO:0008233//peptidase activity;GO:0004185//serine-type carboxypeptidase activity;GO:0008236//serine-type peptidase activity;GO:0140096//catalytic activity, acting on a protein;GO:0070008//serine-type exopeptidase activity;GO:0003824//catalytic activity;GO:0070011//peptidase activity, acting o…	[F]catalytic activity;
Solyc02g030480.2	[F]GO:0016491//oxidoreductase activity;GO:0046914//transition metal ion binding;GO:0043167//ion binding;GO:0046872//metal ion binding;GO:0043169//cation binding;GO:0005488//binding;GO:0008270//zinc ion binding;GO:0003824//catalytic activity;	[F]catalytic activity;binding;
Solyc02g063180.2	[F]GO:1901265//nucleoside phosphate binding;GO:0005488//binding;GO:0003824//catalytic activity;GO:0000166//nucleotide binding;GO:0071949//FAD binding;GO:0050660//flavin adenine dinucleotide binding;GO:0050662//coenzyme binding;GO:0008762//UDP-N-acetylmuramate dehydrogenase activity;GO:0043167//ion binding;GO:0016616//oxidoreductase activity, acting on the CH-OH group of donors, NAD or NADP as acc…	[F]catalytic activity;binding;
Solyc02g068060.2	[C]GO:0044425//membrane part;GO:0016020//membrane;GO:0031224//intrinsic component of membrane;GO:0016021//integral component of membrane;[F]GO:0030554//adenyl nucleotide binding;GO:0097367//carbohydrate derivative binding;GO:0016772//transferase activity, transferring phosphorus-containing groups;GO:0016740//transferase activity;GO:0036094//small molecule binding;GO:0032555//purine ribonucleotide…	[C]membrane;membrane part;[F]binding;catalytic activity;
Solyc02g069410.2	[C]GO:0044446//intracellular organelle part;GO:0009536//plastid;GO:0043229//intracellular organelle;GO:0009507//chloroplast;GO:0005737//cytoplasm;GO:0005623//cell;GO:0043226//organelle;GO:0009570//chloroplast stroma;GO:0005622//intracellular;GO:0043227//membrane-bounded organelle;GO:0043231//intracellular membrane-bounded organelle;GO:0044424//intracellular part;GO:0044444//cytoplasmic part;GO:00…	[C]organelle;organelle part;cell;[F]catalytic activity;
Solyc02g071800.2
Solyc02g077110.2	[P]GO:0071704//organic substance metabolic process;GO:0044238//primary metabolic process;GO:0008152//metabolic process;GO:0006629//lipid metabolic process;[F]GO:0003824//catalytic activity;GO:0016788//hydrolase activity, acting on ester bonds;GO:0016298//lipase activity;GO:0004620//phospholipase activity;GO:0008970//phospholipase A1 activity;GO:0052689//carboxylic ester hydrolase activity;GO:0016…	[P]metabolic process;[F]catalytic activity;
Solyc02g078760.1
Solyc02g081900.2	[F]GO:0043167//ion binding;GO:0046914//transition metal ion binding;GO:0046872//metal ion binding;GO:0008270//zinc ion binding;GO:0005488//binding;GO:0043169//cation binding;	[F]binding;
Solyc02g081980.2	[C]GO:0044425//membrane part;GO:0016020//membrane;GO:0031224//intrinsic component of membrane;GO:0016021//integral component of membrane;[F]GO:0016787//hydrolase activity;GO:0003824//catalytic activity;	[C]membrane part;membrane;[F]catalytic activity;
Solyc02g083810.2	[P]GO:0042742//defense response to bacterium;GO:0009605//response to external stimulus;GO:0043207//response to external biotic stimulus;GO:0051707//response to other organism;GO:0006952//defense response;GO:0009617//response to bacterium;GO:0008152//metabolic process;GO:0051704//multi-organism process;GO:0044237//cellular metabolic process;GO:0009607//response to biotic stimulus;GO:0006950//respo…	[C]extracellular region;cell;organelle part;membrane;organelle;[P]cellular process;multi-organism process;response to stimulus;metabolic process;[F]binding;catalytic activity;
Solyc02g085480.2	[C]GO:0016021//integral component of membrane;GO:0044425//membrane part;GO:0031224//intrinsic component of membrane;GO:0016020//membrane;	[C]membrane part;membrane;
Solyc02g089640.2	[C]GO:0044425//membrane part;GO:0044431//Golgi apparatus part;GO:0031984//organelle subcompartment;GO:0044422//organelle part;GO:0097708//intracellular vesicle;GO:0098791//Golgi subcompartment;GO:0071944//cell periphery;GO:0016020//membrane;GO:0031410//cytoplasmic vesicle;GO:0016021//integral component of membrane;GO:0005622//intracellular;GO:0005794//Golgi apparatus;GO:0005737//cytoplasm;GO:0005…	[C]cell;membrane part;membrane;organelle part;organelle;[F]catalytic activity;binding;
Solyc02g091470.2	[F]GO:1901265//nucleoside phosphate binding;GO:0016740//transferase activity;GO:0005488//binding;GO:0003824//catalytic activity;GO:0043168//anion binding;GO:0097159//organic cyclic compound binding;GO:0000166//nucleotide binding;GO:0032553//ribonucleotide binding;GO:0008144//drug binding;GO:0032555//purine ribonucleotide binding;GO:0036094//small molecule binding;GO:0097367//carbohydrate derivati…	[F]catalytic activity;binding;
Solyc02g093590.2	[C]GO:0043231//intracellular membrane-bounded organelle;GO:0044464//cell part;GO:0044424//intracellular part;GO:0043229//intracellular organelle;GO:0043227//membrane-bounded organelle;GO:0043226//organelle;GO:0005623//cell;GO:0005634//nucleus;GO:0005622//intracellular;	[C]cell;organelle;
Solyc03g006830.2	[P]GO:0048522//positive regulation of cellular process;GO:0050794//regulation of cellular process;GO:0045935//positive regulation of nucleobase-containing compound metabolic process;GO:0019219//regulation of nucleobase-containing compound metabolic process;GO:2000112//regulation of cellular macromolecule biosynthetic process;GO:0031325//positive regulation of cellular metabolic process;GO:0010468…	[C]cell;organelle;[P]biological regulation;[F]transcription regulator activity;binding;
Solyc03g013340.2	[C]GO:0016020//membrane;GO:0031224//intrinsic component of membrane;GO:0044425//membrane part;GO:0016021//integral component of membrane;[F]GO:0005215//transporter activity;GO:0022857//transmembrane transporter activity;GO:0015267//channel activity;GO:0022803//passive transmembrane transporter activity;	[C]membrane;membrane part;[F]transporter activity;
Solyc03g019660.2
Solyc03g025410.2
Solyc03g026120.2	[C]GO:0031224//intrinsic component of membrane;GO:0016020//membrane;GO:0016021//integral component of membrane;GO:0044425//membrane part;[F]GO:0008168//methyltransferase activity;GO:0016740//transferase activity;GO:0003824//catalytic activity;GO:0016741//transferase activity, transferring one-carbon groups;	[C]membrane part;membrane;[F]catalytic activity;
Solyc03g034320.2	[P]GO:0043436//oxoacid metabolic process;GO:0008152//metabolic process;GO:0009987//cellular process;GO:0044238//primary metabolic process;GO:0009064//glutamine family amino acid metabolic process;GO:1901564//organonitrogen compound metabolic process;GO:1901605//alpha-amino acid metabolic process;GO:0019752//carboxylic acid metabolic process;GO:0006807//nitrogen compound metabolic process;GO:00060…	[P]cellular process;metabolic process;[F]catalytic activity;
Solyc03g083050.2
Solyc03g083100.2
Solyc03g096850.2	[C]GO:0055035//plastid thylakoid membrane;GO:0016021//integral component of membrane;GO:0009535//chloroplast thylakoid membrane;GO:0044435//plastid part;GO:0044444//cytoplasmic part;GO:0044446//intracellular organelle part;GO:0044434//chloroplast part;GO:0044464//cell part;GO:0009507//chloroplast;GO:0031224//intrinsic component of membrane;GO:0044422//organelle part;GO:0043227//membrane-bounded o…	[C]membrane;organelle;cell;membrane part;organelle part;[F]binding;
Solyc03g113280.2	[C]GO:0031224//intrinsic component of membrane;GO:0016021//integral component of membrane;GO:0044425//membrane part;GO:0016020//membrane;	[C]membrane part;membrane;
Solyc03g114930.2	[P]GO:0015979//photosynthesis;GO:0044237//cellular metabolic process;GO:0008152//metabolic process;GO:0009987//cellular process;[C]GO:0005623//cell;GO:0009507//chloroplast;GO:0009521//photosystem;GO:0044436//thylakoid part;GO:0009579//thylakoid;GO:1990204//oxidoreductase complex;GO:0042651//thylakoid membrane;GO:0016020//membrane;GO:0044425//membrane part;GO:0098796//membrane protein complex;GO:0…	[C]organelle;membrane part;protein-containing complex;membrane;cell;[P]metabolic process;cellular process;[F]binding;
Solyc03g115120.1	[F]GO:1901363//heterocyclic compound binding;GO:0043167//ion binding;GO:0008270//zinc ion binding;GO:0005488//binding;GO:0046914//transition metal ion binding;GO:0046872//metal ion binding;GO:0003676//nucleic acid binding;GO:0097159//organic cyclic compound binding;GO:0043169//cation binding;	[F]binding;
Solyc03g121720.2	[F]GO:0003824//catalytic activity;GO:1901265//nucleoside phosphate binding;GO:0036094//small molecule binding;GO:0005488//binding;GO:0097159//organic cyclic compound binding;GO:0048037//cofactor binding;GO:0016491//oxidoreductase activity;GO:0050661//NADP binding;GO:1901363//heterocyclic compound binding;GO:0051287//NAD binding;GO:0050662//coenzyme binding;GO:0000166//nucleotide binding;	[F]binding;catalytic activity;
Solyc04g005560.2	[P]GO:0010015//root morphogenesis;GO:0048856//anatomical structure development;GO:0007049//cell cycle;GO:0000278//mitotic cell cycle;GO:0016192//vesicle-mediated transport;GO:0009798//axis specification;GO:0007275//multicellular organism development;GO:0048765//root hair cell differentiation;GO:0051641//cellular localization;GO:0032989//cellular component morphogenesis;GO:0048528//post-embryonic …	[C]organelle;membrane;cell;[P]response to stimulus;growth;developmental process;cellular process;reproduction;reproductive process;multicellular organismal process;biological regulation;cellular component organization or biogenesis;biological adhesion;localization;[F]molecular function regulator;binding;
Solyc04g009420.2	[P]GO:0015979//photosynthesis;GO:0009987//cellular process;GO:0044237//cellular metabolic process;GO:0008152//metabolic process;[C]GO:0044464//cell part;GO:0005622//intracellular;GO:0009579//thylakoid;GO:0042651//thylakoid membrane;GO:0009521//photosystem;GO:0009654//photosystem II oxygen evolving complex;GO:0044425//membrane part;GO:0032991//protein-containing complex;GO:0044436//thylakoid part;…	[C]membrane;cell;protein-containing complex;membrane part;[P]metabolic process;cellular process;[F]binding;
Solyc04g049710.2
Solyc04g064940.2	[C]GO:0031224//intrinsic component of membrane;GO:0016021//integral component of membrane;GO:0044425//membrane part;GO:0016020//membrane;[F]GO:1901265//nucleoside phosphate binding;GO:0035639//purine ribonucleoside triphosphate binding;GO:0016740//transferase activity;GO:0097159//organic cyclic compound binding;GO:0005488//binding;GO:0005524//ATP binding;GO:0140096//catalytic activity, acting on …	[C]membrane part;membrane;[F]binding;catalytic activity;
Solyc04g079690.2	[F]GO:0016773//phosphotransferase activity, alcohol group as acceptor;GO:0016740//transferase activity;GO:0097159//organic cyclic compound binding;GO:0004713//protein tyrosine kinase activity;GO:0097367//carbohydrate derivative binding;GO:0032555//purine ribonucleotide binding;GO:0036094//small molecule binding;GO:0016301//kinase activity;GO:0035639//purine ribonucleoside triphosphate binding;GO:…	[F]catalytic activity;binding;
Solyc04g079960.1	[P]GO:0006720//isoprenoid metabolic process;GO:0006629//lipid metabolic process;GO:0009987//cellular process;GO:0044238//primary metabolic process;GO:1901576//organic substance biosynthetic process;GO:0009058//biosynthetic process;GO:0008299//isoprenoid biosynthetic process;GO:0044249//cellular biosynthetic process;GO:0044255//cellular lipid metabolic process;GO:0071704//organic substance metabol…	[P]metabolic process;cellular process;[F]catalytic activity;
Solyc04g080380.2	[C]GO:0044425//membrane part;GO:0031224//intrinsic component of membrane;GO:0016021//integral component of membrane;GO:0016020//membrane;[F]GO:0003824//catalytic activity;GO:0003880//protein C-terminal carboxyl O-methyltransferase activity;GO:0016740//transferase activity;GO:0008276//protein methyltransferase activity;GO:0016741//transferase activity, transferring one-carbon groups;GO:0010340//ca…	[C]membrane part;membrane;[F]catalytic activity;
Solyc04g080660.2	[P]GO:0019752//carboxylic acid metabolic process;GO:0032787//monocarboxylic acid metabolic process;GO:0006950//response to stress;GO:0043436//oxoacid metabolic process;GO:0009694//jasmonic acid metabolic process;GO:0065007//biological regulation;GO:0065008//regulation of biological quality;GO:0071704//organic substance metabolic process;GO:0010817//regulation of hormone levels;GO:0050896//respons…	[P]response to stimulus;cellular process;biological regulation;metabolic process;[F]catalytic activity;
Solyc05g008120.2
Solyc05g009470.2	[P]GO:0044238//primary metabolic process;GO:0071704//organic substance metabolic process;GO:0005975//carbohydrate metabolic process;GO:0008152//metabolic process;[F]GO:0004558//alpha-1,4-glucosidase activity;GO:0004553//hydrolase activity, hydrolyzing O-glycosyl compounds;GO:0032450//maltose alpha-glucosidase activity;GO:0003824//catalytic activity;GO:0015926//glucosidase activity;GO:0030246//car…	[P]metabolic process;[F]binding;catalytic activity;
Solyc05g009890.1	[F]GO:0070011//peptidase activity, acting on L-amino acid peptides;GO:0003824//catalytic activity;GO:0008233//peptidase activity;GO:0070001//aspartic-type peptidase activity;GO:0140096//catalytic activity, acting on a protein;GO:0004190//aspartic-type endopeptidase activity;GO:0016787//hydrolase activity;GO:0004175//endopeptidase activity;	[F]catalytic activity;
Solyc05g026490.2	[P]GO:0044238//primary metabolic process;GO:0008152//metabolic process;GO:0005975//carbohydrate metabolic process;GO:0071704//organic substance metabolic process;[F]GO:0016866//intramolecular transferase activity;GO:0003824//catalytic activity;GO:0016868//intramolecular transferase activity, phosphotransferases;GO:0016853//isomerase activity;	[P]metabolic process;[F]catalytic activity;
Solyc05g043330.2	[F]GO:0016788//hydrolase activity, acting on ester bonds;GO:0016787//hydrolase activity;GO:0003824//catalytic activity;	[F]catalytic activity;
Solyc05g050770.2	[F]GO:0003824//catalytic activity;GO:0008236//serine-type peptidase activity;GO:0017171//serine hydrolase activity;GO:0004185//serine-type carboxypeptidase activity;GO:0008238//exopeptidase activity;GO:0070008//serine-type exopeptidase activity;GO:0070011//peptidase activity, acting on L-amino acid peptides;GO:0004180//carboxypeptidase activity;GO:0016787//hydrolase activity;GO:0008233//peptidase…	[F]catalytic activity;
Solyc05g054030.2	[F]GO:0005488//binding;GO:1901363//heterocyclic compound binding;GO:0003676//nucleic acid binding;GO:0097159//organic cyclic compound binding;	[F]binding;
Solyc05g054320.2	[F]GO:0016787//hydrolase activity;GO:0003824//catalytic activity;	[F]catalytic activity;
Solyc06g005680.2	[C]GO:0043229//intracellular organelle;GO:0043231//intracellular membrane-bounded organelle;GO:0043226//organelle;GO:0043227//membrane-bounded organelle;GO:0044464//cell part;GO:0005622//intracellular;GO:0044424//intracellular part;GO:0005634//nucleus;GO:0005623//cell;[F]GO:0097159//organic cyclic compound binding;GO:0003677//DNA binding;GO:1901363//heterocyclic compound binding;GO:0003676//nucle…	[C]organelle;cell;[F]binding;
Solyc06g005710.2
Solyc06g007130.2	[P]GO:0006629//lipid metabolic process;GO:0071704//organic substance metabolic process;GO:0044238//primary metabolic process;GO:0008152//metabolic process;[C]GO:0031224//intrinsic component of membrane;GO:0016021//integral component of membrane;GO:0044425//membrane part;GO:0016020//membrane;[F]GO:0016717//oxidoreductase activity, acting on paired donors, with oxidation of a pair of donors resulti…	[C]membrane;membrane part;[P]metabolic process;[F]catalytic activity;
Solyc06g007960.2	[F]GO:0016741//transferase activity, transferring one-carbon groups;GO:0005515//protein binding;GO:0008171//O-methyltransferase activity;GO:0003824//catalytic activity;GO:0008168//methyltransferase activity;GO:0046983//protein dimerization activity;GO:0016740//transferase activity;GO:0005488//binding;	[F]catalytic activity;binding;
Solyc06g009670.2
Solyc06g035580.2
Solyc06g035600.2
Solyc06g048920.2	[P]GO:1901575//organic substance catabolic process;GO:0045087//innate immune response;GO:0009056//catabolic process;GO:0006952//defense response;GO:1901136//carbohydrate derivative catabolic process;GO:0051707//response to other organism;GO:1901576//organic substance biosynthetic process;GO:0006955//immune response;GO:0046486//glycerolipid metabolic process;GO:0008610//lipid biosynthetic process;…	[C]organelle;protein-containing complex;organelle part;cell;[P]response to stimulus;cellular process;immune system process;multi-organism process;metabolic process;[F]binding;catalytic activity;
Solyc06g051460.2	[P]GO:1901700//response to oxygen-containing compound;GO:0042221//response to chemical;GO:0071704//organic substance metabolic process;GO:0043170//macromolecule metabolic process;GO:0006807//nitrogen compound metabolic process;GO:0009719//response to endogenous stimulus;GO:1901564//organonitrogen compound metabolic process;GO:0050896//response to stimulus;GO:0033993//response to lipid;GO:1902347/…	[P]response to stimulus;metabolic process;[F]binding;
Solyc06g052010.1
Solyc06g060340.2	[P]GO:0044237//cellular metabolic process;GO:0008152//metabolic process;GO:0009987//cellular process;GO:0015979//photosynthesis;[C]GO:0005622//intracellular;GO:0043231//intracellular membrane-bounded organelle;GO:0031224//intrinsic component of membrane;GO:0009579//thylakoid;GO:0043226//organelle;GO:0016021//integral component of membrane;GO:0044464//cell part;GO:0044444//cytoplasmic part;GO:0005…	[C]protein-containing complex;membrane;organelle part;cell;membrane part;organelle;[P]cellular process;metabolic process;
Solyc06g066170.2
Solyc06g067870.2	[F]GO:0016491//oxidoreductase activity;GO:0046872//metal ion binding;GO:0051213//dioxygenase activity;GO:0005488//binding;GO:0003824//catalytic activity;GO:0043167//ion binding;GO:0043169//cation binding;	[F]catalytic activity;binding;
Solyc06g071330.2	[C]GO:0016021//integral component of membrane;GO:0016020//membrane;GO:0031224//intrinsic component of membrane;GO:0044425//membrane part;[F]GO:0022857//transmembrane transporter activity;GO:0005215//transporter activity;	[C]membrane;membrane part;[F]transporter activity;
Solyc06g074820.2	[C]GO:0016020//membrane;GO:0031224//intrinsic component of membrane;GO:0044425//membrane part;GO:0016021//integral component of membrane;[F]GO:0005372//water transmembrane transporter activity;GO:0005215//transporter activity;GO:0015318//inorganic molecular entity transmembrane transporter activity;GO:0015267//channel activity;GO:0015250//water channel activity;GO:0022838//substrate-specific chan…	[C]membrane part;membrane;[F]transporter activity;
Solyc06g074850.2	[F]GO:0070011//peptidase activity, acting on L-amino acid peptides;GO:0070008//serine-type exopeptidase activity;GO:0003824//catalytic activity;GO:0008233//peptidase activity;GO:0140096//catalytic activity, acting on a protein;GO:0008238//exopeptidase activity;GO:0016787//hydrolase activity;GO:0004185//serine-type carboxypeptidase activity;GO:0008236//serine-type peptidase activity;GO:0004180//ca…	[F]catalytic activity;
Solyc06g083470.2
Solyc07g006000.2	[P]GO:0009059//macromolecule biosynthetic process;GO:0009987//cellular process;GO:0009058//biosynthetic process;GO:0043043//peptide biosynthetic process;GO:0008152//metabolic process;GO:0044249//cellular biosynthetic process;GO:0006412//translation;GO:0044267//cellular protein metabolic process;GO:1901564//organonitrogen compound metabolic process;GO:0006518//peptide metabolic process;GO:0034641/…	[C]organelle;protein-containing complex;cell;[P]cellular process;metabolic process;[F]structural molecule activity;
Solyc07g007280.2
Solyc07g041920.2	[F]GO:0070011//peptidase activity, acting on L-amino acid peptides;GO:0008234//cysteine-type peptidase activity;GO:0008233//peptidase activity;GO:0003824//catalytic activity;GO:0016787//hydrolase activity;GO:0140096//catalytic activity, acting on a protein;	[F]catalytic activity;
Solyc07g052610.2	[P]GO:0050790//regulation of catalytic activity;GO:0000079//regulation of cyclin-dependent protein serine/threonine kinase activity;GO:0050789//regulation of biological process;GO:0065009//regulation of molecular function;GO:0032268//regulation of cellular protein metabolic process;GO:0071900//regulation of protein serine/threonine kinase activity;GO:0001932//regulation of protein phosphorylation…	[P]biological regulation;[F]binding;
Solyc07g054170.2	[P]GO:0044703//multi-organism reproductive process;GO:0051704//multi-organism process;GO:0000003//reproduction;GO:0022414//reproductive process;GO:0019953//sexual reproduction;[C]GO:0016021//integral component of membrane;GO:0031224//intrinsic component of membrane;GO:0005576//extracellular region;GO:0044425//membrane part;GO:0016020//membrane;	[C]membrane;membrane part;extracellular region;[P]reproduction;multi-organism process;reproductive process;
Solyc07g054820.2	[P]GO:0071840//cellular component organization or biogenesis;GO:0016043//cellular component organization;GO:0006091//generation of precursor metabolites and energy;GO:0015979//photosynthesis;GO:0044237//cellular metabolic process;GO:0010207//photosystem II assembly;GO:0009987//cellular process;GO:0034622//cellular protein-containing complex assembly;GO:0044085//cellular component biogenesis;GO:00…	[C]organelle part;membrane part;cell;organelle;membrane;[P]cellular component organization or biogenesis;cellular process;metabolic process;
Solyc07g056000.2	[P]GO:0016043//cellular component organization;GO:0010411//xyloglucan metabolic process;GO:0071555//cell wall organization;GO:0044264//cellular polysaccharide metabolic process;GO:0044085//cellular component biogenesis;GO:0044036//cell wall macromolecule metabolic process;GO:0006073//cellular glucan metabolic process;GO:0042546//cell wall biogenesis;GO:0044042//glucan metabolic process;GO:0005975…	[C]cell;extracellular region;[P]cellular process;cellular component organization or biogenesis;metabolic process;[F]catalytic activity;
Solyc07g062710.2	[F]GO:0140110//transcription regulator activity;GO:0003700//DNA-binding transcription factor activity;	[F]transcription regulator activity;
Solyc07g063320.2	[F]GO:0003824//catalytic activity;	[F]catalytic activity;
Solyc07g064830.2	[P]GO:0032501//multicellular organismal process;GO:0055114//oxidation-reduction process;GO:0006112//energy reserve metabolic process;GO:0044264//cellular polysaccharide metabolic process;GO:0048856//anatomical structure development;GO:0044262//cellular carbohydrate metabolic process;GO:0005975//carbohydrate metabolic process;GO:0016051//carbohydrate biosynthetic process;GO:0033692//cellular polys…	[C]organelle;cell;[P]cellular process;metabolic process;multicellular organismal process;developmental process;[F]binding;catalytic activity;
Solyc08g006930.2	[P]GO:0009987//cellular process;GO:0008152//metabolic process;GO:0015979//photosynthesis;GO:0044237//cellular metabolic process;[C]GO:0009536//plastid;GO:0044464//cell part;GO:0031976//plastid thylakoid;GO:0009521//photosystem;GO:0043226//organelle;GO:0005737//cytoplasm;GO:0016020//membrane;GO:0098796//membrane protein complex;GO:0009522//photosystem I;GO:0009507//chloroplast;GO:0044435//plastid …	[C]protein-containing complex;organelle;membrane;cell;organelle part;membrane part;[P]cellular process;metabolic process;
Solyc08g042100.2
Solyc08g043180.2	[P]GO:0015979//photosynthesis;GO:0044237//cellular metabolic process;GO:0008152//metabolic process;GO:0009987//cellular process;[C]GO:0009521//photosystem;GO:0005622//intracellular;GO:0016020//membrane;GO:0044464//cell part;GO:0009654//photosystem II oxygen evolving complex;GO:0032991//protein-containing complex;GO:1990204//oxidoreductase complex;GO:0042651//thylakoid membrane;GO:0044436//thylako…	[C]protein-containing complex;membrane part;cell;membrane;[P]cellular process;metabolic process;[F]binding;
Solyc08g066490.2	[C]GO:0031224//intrinsic component of membrane;GO:0016020//membrane;GO:0044425//membrane part;GO:0016021//integral component of membrane;[F]GO:0097159//organic cyclic compound binding;GO:0030554//adenyl nucleotide binding;GO:0003824//catalytic activity;GO:0005524//ATP binding;GO:0016740//transferase activity;GO:0043168//anion binding;GO:0097367//carbohydrate derivative binding;GO:0017076//purine …	[C]membrane;membrane part;[F]catalytic activity;binding;
Solyc08g068490.2
Solyc08g075080.2
Solyc08g075680.2
Solyc08g076220.2	[P]GO:0005975//carbohydrate metabolic process;GO:0008152//metabolic process;GO:0071704//organic substance metabolic process;GO:0044238//primary metabolic process;[F]GO:0097159//organic cyclic compound binding;GO:0000166//nucleotide binding;GO:0043167//ion binding;GO:0032555//purine ribonucleotide binding;GO:0032553//ribonucleotide binding;GO:0036094//small molecule binding;GO:1901363//heterocycli…	[P]metabolic process;[F]catalytic activity;binding;
Solyc08g080100.2	[P]GO:0031325//positive regulation of cellular metabolic process;GO:0019222//regulation of metabolic process;GO:1903506//regulation of nucleic acid-templated transcription;GO:0010628//positive regulation of gene expression;GO:0009889//regulation of biosynthetic process;GO:0010557//positive regulation of macromolecule biosynthetic process;GO:0010468//regulation of gene expression;GO:0031328//posit…	[C]organelle;cell;[P]biological regulation;[F]transcription regulator activity;binding;
Solyc09g008260.2
Solyc09g009010.2	[C]GO:0031224//intrinsic component of membrane;GO:0016021//integral component of membrane;GO:0044425//membrane part;GO:0016020//membrane;[F]GO:0016740//transferase activity;GO:0003824//catalytic activity;	[C]membrane;membrane part;[F]catalytic activity;
Solyc09g014520.2	[P]GO:0044237//cellular metabolic process;GO:0044260//cellular macromolecule metabolic process;GO:0006807//nitrogen compound metabolic process;GO:0006464//cellular protein modification process;GO:0006091//generation of precursor metabolites and energy;GO:0036211//protein modification process;GO:0009765//photosynthesis, light harvesting;GO:0044238//primary metabolic process;GO:1901564//organonitro…	[C]membrane;membrane part;protein-containing complex;organelle;cell;organelle part;[P]cellular process;metabolic process;[F]binding;
Solyc09g061420.2
Solyc09g083190.2	[P]GO:0006950//response to stress;GO:0006979//response to oxidative stress;GO:0050896//response to stimulus;[C]GO:0016020//membrane;GO:0044434//chloroplast part;GO:0044425//membrane part;GO:0034357//photosynthetic membrane;GO:0009579//thylakoid;GO:0005737//cytoplasm;GO:0031984//organelle subcompartment;GO:0044435//plastid part;GO:0044446//intracellular organelle part;GO:0031224//intrinsic compone…	[C]membrane part;organelle;cell;organelle part;membrane;[P]response to stimulus;
Solyc09g097910.2	[C]GO:0043229//intracellular organelle;GO:0043226//organelle;GO:0043228//non-membrane-bounded organelle;GO:0032991//protein-containing complex;GO:0044444//cytoplasmic part;GO:0044424//intracellular part;GO:0005840//ribosome;GO:0044464//cell part;GO:0005737//cytoplasm;GO:0005622//intracellular;GO:0005623//cell;GO:1990904//ribonucleoprotein complex;GO:0043232//intracellular non-membrane-bounded org…	[C]protein-containing complex;organelle;cell;[F]binding;
Solyc10g005540.2	[F]GO:0016740//transferase activity;GO:0003824//catalytic activity;GO:0008168//methyltransferase activity;GO:0016741//transferase activity, transferring one-carbon groups;	[F]catalytic activity;
Solyc10g007750.1	[C]GO:0044425//membrane part;GO:0016021//integral component of membrane;GO:0031224//intrinsic component of membrane;GO:0016020//membrane;	[C]membrane;membrane part;
Solyc10g009530.2	[F]GO:0050662//coenzyme binding;GO:0003824//catalytic activity;GO:0005488//binding;GO:0048037//cofactor binding;	[F]binding;catalytic activity;
Solyc10g018530.1	[P]GO:1903046//meiotic cell cycle process;GO:0006725//cellular aromatic compound metabolic process;GO:0009987//cellular process;GO:0045132//meiotic chromosome segregation;GO:0044238//primary metabolic process;GO:1901360//organic cyclic compound metabolic process;GO:0070192//chromosome organization involved in meiotic cell cycle;GO:0071840//cellular component organization or biogenesis;GO:0046483/…	[C]membrane;membrane part;cell;protein-containing complex;[P]response to stimulus;reproduction;reproductive process;metabolic process;cellular component organization or biogenesis;cellular process;[F]binding;catalytic activity;
Solyc10g047410.1	[P]GO:0044238//primary metabolic process;GO:0006091//generation of precursor metabolites and energy;GO:0019538//protein metabolic process;GO:0008152//metabolic process;GO:0071704//organic substance metabolic process;GO:0022900//electron transport chain;GO:0009767//photosynthetic electron transport chain;GO:0018298//protein-chromophore linkage;GO:0006807//nitrogen compound metabolic process;GO:000…	[C]protein-containing complex;cell;organelle part;membrane part;membrane;organelle;[P]cellular process;metabolic process;[F]binding;catalytic activity;
Solyc10g079230.1	[C]GO:0031224//intrinsic component of membrane;GO:0044425//membrane part;GO:0016021//integral component of membrane;GO:0016020//membrane;	[C]membrane;membrane part;
Solyc10g080490.1
Solyc10g080940.1	[P]GO:0007017//microtubule-based process;GO:0009987//cellular process;[C]GO:0015630//microtubule cytoskeleton;GO:0043228//non-membrane-bounded organelle;GO:0044446//intracellular organelle part;GO:0044430//cytoskeletal part;GO:0043226//organelle;GO:0099081//supramolecular polymer;GO:0005856//cytoskeleton;GO:0005623//cell;GO:0005737//cytoplasm;GO:0099080//supramolecular complex;GO:0043232//intrace…	[C]cell;organelle;organelle part;supramolecular complex;[P]cellular process;[F]binding;catalytic activity;structural molecule activity;
Solyc10g084290.1
Solyc10g086390.1
Solyc11g006420.1	[C]GO:0005623//cell;GO:0044464//cell part;GO:0044424//intracellular part;GO:0005622//intracellular;GO:0005737//cytoplasm;[F]GO:0016791//phosphatase activity;GO:0008253//5'-nucleotidase activity;GO:0000287//magnesium ion binding;GO:0046872//metal ion binding;GO:0005488//binding;GO:0008252//nucleotidase activity;GO:0016788//hydrolase activity, acting on ester bonds;GO:0043169//cation binding;GO:004…	[C]cell;[F]catalytic activity;binding;
Solyc11g007250.1	[F]GO:0005488//binding;GO:0097159//organic cyclic compound binding;GO:0032559//adenyl ribonucleotide binding;GO:0005524//ATP binding;GO:0043168//anion binding;GO:0032553//ribonucleotide binding;GO:0016301//kinase activity;GO:0017076//purine nucleotide binding;GO:0000166//nucleotide binding;GO:0016772//transferase activity, transferring phosphorus-containing groups;GO:0003824//catalytic activity;G…	[F]binding;catalytic activity;
Solyc11g008640.1	[P]GO:0009648//photoperiodism;GO:0065007//biological regulation;GO:0003006//developmental process involved in reproduction;GO:0048831//regulation of shoot system development;GO:0048573//photoperiodism, flowering;GO:0050789//regulation of biological process;GO:0048580//regulation of post-embryonic development;GO:2000241//regulation of reproductive process;GO:0009909//regulation of flower developme…	[P]reproduction;developmental process;multicellular organismal process;biological regulation;reproductive process;response to stimulus;[F]binding;
Solyc11g008870.1	[P]GO:0006082//organic acid metabolic process;GO:0006732//coenzyme metabolic process;GO:0043603//cellular amide metabolic process;GO:0044237//cellular metabolic process;GO:0051186//cofactor metabolic process;GO:0046653//tetrahydrofolate metabolic process;GO:1901360//organic cyclic compound metabolic process;GO:0034641//cellular nitrogen compound metabolic process;GO:0043436//oxoacid metabolic pro…	[P]metabolic process;cellular process;[F]catalytic activity;
Solyc11g013270.1	[P]GO:0044281//small molecule metabolic process;GO:0005975//carbohydrate metabolic process;GO:0019318//hexose metabolic process;GO:0071704//organic substance metabolic process;GO:0008152//metabolic process;GO:0005996//monosaccharide metabolic process;GO:0006004//fucose metabolic process;GO:0044238//primary metabolic process;[C]GO:0044425//membrane part;GO:0031224//intrinsic component of membrane;…	[C]membrane part;membrane;[P]metabolic process;[F]catalytic activity;
Solyc11g018500.1	[P]GO:0005975//carbohydrate metabolic process;GO:0044238//primary metabolic process;GO:0071704//organic substance metabolic process;GO:0008152//metabolic process;[F]GO:0004565//beta-galactosidase activity;GO:0016787//hydrolase activity;GO:0003824//catalytic activity;GO:0016798//hydrolase activity, acting on glycosyl bonds;GO:0004553//hydrolase activity, hydrolyzing O-glycosyl compounds;GO:0015925…	[P]metabolic process;[F]catalytic activity;
Solyc11g044530.1
Solyc11g064750.1
Solyc11g071290.1	[P]GO:0008152//metabolic process;GO:0055114//oxidation-reduction process;[F]GO:0003824//catalytic activity;GO:0016491//oxidoreductase activity;GO:0046914//transition metal ion binding;GO:0008270//zinc ion binding;GO:0005488//binding;GO:0046872//metal ion binding;GO:0043167//ion binding;GO:0043169//cation binding;	[P]metabolic process;[F]binding;catalytic activity;
Solyc11g072490.1
Solyc12g006120.1
Solyc12g009070.1	[P]GO:0044237//cellular metabolic process;GO:0009987//cellular process;GO:0008152//metabolic process;GO:0015979//photosynthesis;[C]GO:0044464//cell part;GO:0005622//intracellular;GO:0009521//photosystem;GO:0009523//photosystem II;GO:0005623//cell;GO:0098796//membrane protein complex;GO:0044436//thylakoid part;GO:0044424//intracellular part;GO:0016020//membrane;GO:0044425//membrane part;GO:0016021…	[C]membrane part;cell;protein-containing complex;membrane;[P]metabolic process;cellular process;
Solyc12g042580.1	[C]GO:0044425//membrane part;GO:0016021//integral component of membrane;GO:0031224//intrinsic component of membrane;GO:0016020//membrane;[F]GO:0003824//catalytic activity;GO:0016491//oxidoreductase activity;GO:0009055//electron transfer activity;	[C]membrane;membrane part;[F]catalytic activity;
Solyc12g043150.1	[P]GO:0051179//localization;GO:0051234//establishment of localization;GO:0071705//nitrogen compound transport;GO:0071702//organic substance transport;GO:0015833//peptide transport;GO:0045184//establishment of protein localization;GO:0033036//macromolecule localization;GO:0008104//protein localization;GO:0015031//protein transport;GO:0042886//amide transport;GO:0006810//transport;	[P]localization;
Solyc12g062250.1
Solyc12g094640.1	[P]GO:0006006//glucose metabolic process;GO:0044238//primary metabolic process;GO:0019318//hexose metabolic process;GO:0005996//monosaccharide metabolic process;GO:0044281//small molecule metabolic process;GO:0008152//metabolic process;GO:0071704//organic substance metabolic process;GO:0005975//carbohydrate metabolic process;[C]GO:0044464//cell part;GO:0005737//cytoplasm;GO:0043231//intracellular…	[C]cell;organelle;[P]metabolic process;[F]binding;catalytic activity;
Solyc12g098990.1	[P]GO:0048868//pollen tube development;GO:0048856//anatomical structure development;GO:0044706//multi-multicellular organism process;GO:0009553//embryo sac development;GO:0051704//multi-organism process;GO:0032501//multicellular organismal process;GO:0009793//embryo development ending in seed dormancy;GO:0009856//pollination;GO:0009791//post-embryonic development;GO:0048229//gametophyte developme…	[C]cell;organelle;[P]multicellular organismal process;reproduction;developmental process;reproductive process;multi-organism process;[F]binding;
