# Supplementary material for: Potential Role of Domains Rearranged Methyltransferase7 in Starch and Chlorophyll Metabolism to Regulate Leaf Senescence in Tomato
Source: Front Plant Sci. 2022 Feb 8;13:836015. doi: 10.3389/fpls.2022.836015 (PMC8860812; doi:10.3389/fpls.2022.836015)
Supplement: Supplementary file 7 [file Table_6.XLSX]

## Sheet: Sheet1
Supplementary Table S6. Transcriptome data of genes associated with the photosynthesis light reactions.
		GENE ID	WT FPKM	drm7i-1 FPKM	drm7i_ns-1 FPKM	log2(drm7i-1/WT)	Qvalue(drm7i-1/WT)	Pvalue(drm7i-1/WT)	log2(drm7i_ns-1/WT)	Qvalue(drm7i_ns-1/WT)	Pvalue(drm7i_ns-1/WT)	log2(drm7i-1/drm7i_ns-1)	Qvalue(drm7i-1/drm7i_ns-1)	Pvalue(drm7i-1/drm7i_ns-1)
	PQL1	Solyc10g006530.2	44.33	27.7033	70.1033	-1.08242	0.00400509	0.000929725	0.407371	0.555719	0.247141	-1.43868	0.00809476	0.000380077	XP_004248376.1|1.5e-40|photosynthetic NDH subunit of lumenal location 3, chloroplastic [Solanum lycopersicum]
photosystem Ⅱ	PsbP-2	Solyc03g114930.2	78.7267	37.22	149.13	-1.45999	0.000588542	0.000107431	0.628744	0.467743	0.184577	-1.96621	0.00317412	0.000110984	NP_001334266.1|2.2e-138|photosystem II reaction center PsbP family protein [Solanum lycopersicum]
	ALB3	Solyc11g066110.1	318.257	189.037	293.55	-1.18437	3.34262e-10	1.95296e-11	-0.343989	0.445384	0.169339	-0.816788	0.0354713	0.00305318	XP_004250966.1|4.1e-255|inner membrane protein PPF-1, chloroplastic isoform X1 [Solanum lycopersicum]
	ALB3-2	Solyc05g014050.2	26.0967	48.9067	48.8233	0.456843	2.61652e-05	3.46351e-06	0.659211	0.000521779	3.13675e-05	-0.202686	0.4179	0.140119	XP_010320958.1|2.3e-304|ALBINO3-like protein 1, chloroplastic [Solanum lycopersicum]
	PPD6	Solyc06g065490.2	65.1133	20.2367	71.4667	-2.04745	4.08495e-07	3.82187e-08	-0.0908682	0.939534	0.839643	-1.80791	0.00738535	0.000334572	XP_004241815.1|1.2e-140|psbP domain-containing protein 6, chloroplastic [Solanum lycopersicum]
	PPD5	Solyc08g067840.2	9.75333	37.8933	63.3733	1.4734	6.18418e-05	8.86822e-06	2.34675	1.37547e-09	2.56075e-11	-0.90459	0.0668869	0.00804444	XP_004245232.1|4.4e-166|psbP domain-containing protein 5, chloroplastic [Solanum lycopersicum]
	PPD4	Solyc04g064670.2	91.0733	22.97	20.78	-2.41024	8.52136e-33	8.39765e-35	-2.32243	9.28789e-22	5.63687e-24	-0.0609355	0.927733	0.819994	XP_004237726.1|1.3e-157|psbP domain-containing protein 4, chloroplastic [Solanum lycopersicum]
	PPD3	Solyc12g094720.1	41.1967	21.9867	57.06	-1.31809	3.77464e-05	5.17257e-06	0.218126	0.859196	0.630577	-1.44616	0.024505	0.00178686	XP_004253115.1|2.4e-146|psbP domain-containing protein 3, chloroplastic [Solanum lycopersicum]
	PPD2	Solyc04g009420.2	19.5333	10.2933	22.5067	-1.31798	0.00109044	0.000215098	-0.0309716	0.97746	0.934852	-1.22588	0.0484029	0.00480317	XP_004236825.1|1.1e-129|psbP domain-containing protein 2, chloroplastic [Solanum lycopersicum]
	PPD1	Solyc01g106090.2	17.4333	17.2567	41.0667	-0.439774	0.340001	0.187443	0.93132	0.137426	0.0296397	-1.33349	0.0384963	0.00345409	XP_004230618.1|1.8e-158|psbP domain-containing protein 1, chloroplastic isoform X1 [Solanum lycopersicum]
	PsbA	Solyc02g011990.1	1.38	1.28	2.99667	-0.484053	0.619666	0.435963	0.831545	0.157263	0.0357849	-1.24534	0.125429	0.0207074	PHT54994.1|8.7e-72|Photosystem II protein D1 [Capsicum baccatum]
	PsbD	Solyc09g055950.1	0.836667	0.65	2.05	-0.661355	0.586491	0.398066	0.89569	0.400878	0.141455	-1.53557	0.0920471	0.0130642	OMP05833.1|1.5e-68|Photosynthetic reaction centre, L/M [Corchorus olitorius]
	PsbD2	Solyc00g230080.1	4.28	2.51667	6.75	-1.0517	0.223988	0.108642	0.381096	0.812013	0.521437	-1.40031	0.0960337	0.01393	AXP24541.1|4.5e-60|photosystem II protein D2 (chloroplast) [Psidium sp. BR-2018]
	PsbD3	Solyc07g008990.1
	PsbD4	Solyc05g021190.1	0.73	0.876667	1.85333	-0.103543	0.948653	0.912066	0.78575	0.625148	0.307431	-0.893905	0.554559	0.233061	VDD36169.1|6.5e-35|unnamed protein product [Brassica oleracea]
	PsbD5	Solyc09g031730.1
	PsbD6	Solyc08g065370.1
	PsbW	Solyc06g084050.2	536.387	173.713	437.963	-2.00261	5.24027e-09	3.61493e-10	-0.502246	0.19469	0.048435	-1.44643	0.0050244	0.000201359	XP_004242350.1|1.5e-64|photosystem II reaction center W protein, chloroplastic [Solanum lycopersicum]
	PsbX	Solyc05g025600.1	813.733	443.253	688.11	-1.27252	0.000110324	1.68273e-05	-0.44849	0.15806	0.0360376	-0.801573	0.13562	0.0233612	XP_010321120.1|5.1e-53|uncharacterized protein LOC101259747 [Solanum lycopersicum]
	PsbY	Solyc10g077120.1	5930.89	2880.52	4811.84	-1.45683	1.71201e-09	1.10741e-10	-0.524258	0.00658563	0.00060709	-0.9183	0.0120483	0.000653899	XP_004249106.1|3.9e-98|photosystem II core complex proteins psbY, chloroplastic [Solanum lycopersicum]
	PsbR	Solyc07g066310.2	11512.8	6057.75	8273.17	-1.34143	1.05219e-07	8.95245e-09	-0.694887	0.0293814	0.00394227	-0.62049	0.195381	0.0409023	NP_001234042.1|2.4e-71|photosystem II 10 kDa polypeptide, chloroplastic [Solanum lycopersicum]
	PsbO-1	Solyc02g090030.2	1903.08	1114.19	1731.25	-1.19313	3.86446e-06	4.32049e-07	-0.367359	0.104404	0.0205503	-0.811119	0.0353793	0.00303331	NP_001308345.1|1.3e-186|oxygen-evolving enhancer protein 1, chloroplastic [Solanum lycopersicum]
	PsbO-2	Solyc02g065400.2	3025.49	1236.04	2386.65	-1.69011	2.5306e-08	1.96327e-09	-0.575552	0.00652376	0.000599246	-1.09382	0.0124604	0.00068385	NP_001296294.1|1.8e-183|oxygen-evolving enhancer protein 1, chloroplastic [Solanum lycopersicum]
	PsbB	Solyc01g007500.2	4.96667	3.41333	6.88667	-0.995835	1.67364e-05	2.13872e-06	0.190522	0.666579	0.348857	-1.17136	0.000139361	2.00112e-06	EPS74501.1|0.0e+00|hypothetical protein M569_00218, partial [Genlisea aurea]
	PsbC	Solyc10g017940.1	0.206667	0.0866667	0.52	-0.536854	0.758473	0.591448	0.849326	0.603687	0.288744	-1.43197	0.292524	0.076676	AWH03447.1|1.9e-79|photosytem II 44 kDa protein, partial (chloroplast) [Asclepias macroura]
	PsbE	Solyc10g045230.1	1.65667	1.44	2.67333	-0.510178	0.697278	0.520652	0.389875	0.826189	0.550476	-0.850556	0.531205	0.215215	EPS73485.1|9.5e-35|cytochrome b559 subunit alpha [Genlisea aurea]
	PsbH	Solyc01g007520.2
	PsbI	Solyc02g038710.1
	PsbP	Solyc07g044860.2	3722.23	1786.71	3515.67	-1.46577	4.69357e-07	4.42937e-08	-0.310963	0.288552	0.0856491	-1.12921	0.00748306	0.000342692	NP_001234109.2|6.9e-144|oxygen-evolving enhancer protein 2, chloroplastic [Solanum lycopersicum]
	PsbS	Solyc06g060340.2	608.493	93.57	320.3	-3.002	1.92748e-11	9.56003e-13	-1.04188	0.164524	0.0381456	-1.69883	0.0350583	0.00299352	NP_001296186.1|1.1e-149|photosystem II subunit S [Solanum lycopersicum]
	PsbQ	Solyc02g079950.2	2772.14	1486.12	2742.5	-1.30808	2.3367e-06	2.49705e-07	-0.243848	0.41585	0.150191	-1.04335	0.00980735	0.000485571	NP_001234528.1|3.4e-122|photosystem II oxygen-evolving complex protein 3 [Solanum lycopersicum]
	PETA	Solyc01g007380.1	2.10667	1.46	2.71	-0.917886	0.10629	0.0431919	0.124644	0.909249	0.778227	-1.0325	0.0727819	0.00914313	YP_538861.1|6.9e-180|cytochrome f [Solanum bulbocastanum]
	PETB	Solyc01g007530.2	2.91	1.18	2.92667	-1.61482	0.00681709	0.00170109	-0.216264	0.787659	0.489056	-1.35	0.0589651	0.00656789	AIZ57558.1|9.8e-119|cytochrome b6 (chloroplast) [Clematis fusca var. coreana]
photosystem Ⅰ	PsaK	Solyc08g006930.2	2337.83	685.103	1319.4	-2.17668	2.8028e-13	1.1003e-14	-1.01909	0.00196029	0.000142685	-1.10798	0.030084	0.00242717	XP_004244537.1|1.4e-66|photosystem I reaction center subunit psaK, chloroplastic [Solanum lycopersicum]
	PsaF-1	Solyc02g069460.2	2573.41	909.07	1751.89	-1.89774	1.30141e-10	7.09344e-12	-0.770766	0.00669911	0.00061865	-1.09426	0.0192366	0.0012711	XP_004233198.1|4.3e-126|photosystem I reaction center subunit III, chloroplastic [Solanum lycopersicum]
	PsaF-2	Solyc02g069450.2	670.007	195.71	451.777	-2.15769	5.04451e-10	3.02368e-11	-0.780379	0.0160967	0.00185086	-1.32897	0.0123751	0.000678166	XP_004233199.1|1.3e-125|photosystem I reaction center subunit III, chloroplastic [Solanum lycopersicum]
	PsaH1	Solyc03g120640.2	4311.03	1979.16	3480.31	-1.53222	1.79539e-08	1.3623e-09	-0.526407	0.0880834	0.0163553	-0.977713	0.0290733	0.00231733	XP_004235674.1|1.5e-76|photosystem I reaction center subunit VI-1, chloroplastic [Solanum lycopersicum]
	PsaH2	Solyc06g066640.2	954.2	318.75	631.567	-1.94127	9.85712e-07	9.79796e-08	-0.789553	0.0757561	0.0132658	-1.08521	0.103792	0.0156406	XP_004241734.1|4.6e-75|photosystem I reaction center subunit VI-1, chloroplastic-like [Solanum lycopersicum]
	PsaH3	Solyc12g044280.1	1754.68	308.127	786.597	-2.83375	3.34888e-13	1.31739e-14	-1.35446	2.9664e-08	6.76338e-10	-1.445	0.00970883	0.000479672	NP_001308141.1|1.5e-73|photosystem I reaction center subunit VI, chloroplastic-like [Solanum lycopersicum]
	PsaL	Solyc06g082940.2	3183.25	1771.6	2982.05	-1.25409	3.10621e-05	4.17344e-06	-0.320519	0.326187	0.102781	-0.909785	0.0494401	0.00494742	XP_004242464.1|6.2e-122|photosystem I reaction center subunit XI, chloroplastic [Solanum lycopersicum]
	PsaL-2	Solyc06g082950.2	2471.77	977.03	1534.64	-1.73396	1.64903e-08	1.24189e-09	-0.881897	0.0474634	0.00726957	-0.789606	0.221305	0.0494256	XP_004242465.1|5.3e-121|photosystem I reaction center subunit XI, chloroplastic [Solanum lycopersicum]
	PsaN	Solyc08g013670.2	2114.83	573.853	851.007	-2.26092	9.15391e-13	3.79402e-14	-1.48419	5.73666e-05	2.55815e-06	-0.715177	0.290718	0.0759195	NP_001316061.1|5.4e-86|photosystem I reaction center subunit [Solanum lycopersicum]
	PsaB	Solyc12g033060.1	0.95	0.946667	1.7	-0.382705	0.762706	0.596233	0.538799	0.617523	0.300608	-0.885632	0.412758	0.137123	ASD45691.1|6.0e-132|photosystem I P700 apoprotein A2, partial (chloroplast) [Thinopyrum elongatum]
		Solyc07g021230.1	0.17	0.13	0.333333	-0.202088	0.895648	0.822567	0.2553	0.893172	0.745678	-0.48727	0.81582	0.523914	YP_009093799.1|5.4e-90|photosystem I P700 chlorophyll a apoprotein A2 (chloroplast) [Luzuriaga radicans]
		Solyc12g033050.1	0.343333	0.43	0.593333	-0.0586671	0.967578	0.949567	0.390227	0.859196	0.613955	-0.437895	0.838875	0.568714	NP_783231.1|2.5e-79|photosystem I P700 chlorophyll a apoprotein A2 [Atropa belladonna]
		Solyc07g021240.1	0.0933333	0.07	0.06	-0.0638807	0.958888	0.934595	-0.0308132	0.981146	0.955099	-0.0101689	0.99361	0.984456	YP_009516502.1|7.7e-53|photosystem I P700 chlorophyll a apoprotein A2 (chloroplast) [Malania oleifera]
		Solyc12g062610.1
		Solyc12g032980.1	0.226667	0.0766667	0.23	-1.12114	0.395933	0.229177	-0.0706358	0.974041	0.924952	-0.361006	0.786049	0.48198	CBI36428.3|5.6e-59|unnamed protein product, partial [Vitis vinifera]
		Solyc12g032990.1	0	0	0.19	0	0	0	1.05349	0.445384	0.169393	-1.16012	0.391647	0.125486	PHU11606.1|5.0e-58|Photosystem I chlorophyll a apoprotein A1 [Capsicum chinense]
		Solyc12g062600.1
		Solyc05g020010.1	0.29	0.176667	0.286667	-0.57681	0.743852	0.571931	-0.135694	0.95194	0.868871	-0.340582	0.866491	0.667878	BBA46195.1|2.5e-45|photosystem I P700 chlorophyll a apoprotein A2 (chloroplast) [Vitis cinerea var. helleri]
		Solyc10g017910.1	0.416667	0.28	0.666667	-0.350873	0.820507	0.721762	0.248372	0.903497	0.7656	-0.590319	0.771971	0.461059	PHT94093.1|1.6e-41|Photosystem I chlorophyll a apoprotein A2 [Capsicum annuum]
		Solyc12g035740.1
		Solyc12g033000.1	0.0666667	0.136667	0.136667	0.190629	0.90899	0.840165	0.107562	0.94506	0.854969	-0.024803	0.989348	0.971651	AOV84676.1|1.7e-37|photosystem I P700 apoprotein A2 (chloroplast) [Actinostachys pennula]
		Solyc09g059640.1	0.676667	0.293333	0.67	-1.02181	0.483336	0.300512	-0.154234	0.942623	0.847484	-0.723115	0.699965	0.373605	NP_783231.1|5.5e-39|photosystem I P700 chlorophyll a apoprotein A2 [Atropa belladonna]
		Solyc12g032970.1	0	0.403333	0	0.502268	0.677148	0.496396	0	0	0	0.337314	0.803052	0.502694	OTF84566.1|1.3e-38|putative photosystem I P700 chlorophyll a apoprotein A2 [Helianthus annuus]
		Solyc04g016170.1	0.09	0.0933333	0.533333	-0.0638807	0.958888	0.934595	0.950307	0.560009	0.250519	-1.11126	0.464815	0.169595	YP_009433833.1|2.9e-30|photosystem I P700 chlorophyll a apoprotein A2 (chloroplast) [Hypolytrum nemorum]
		Solyc12g062590.1
		Solyc07g021250.1	0.226667	0	0	-0.283752	0.770248	0.625362	-0.178558	0.859196	0.646823	0	0	0	PHT94646.1|8.8e-27|Photosystem I chlorophyll a apoprotein A2 [Capsicum annuum]
		Solyc02g036320.1	0	0.283333	0	0.214385	0.80458	0.684204	0	0	0	0.145388	0.866491	0.678637	YP_009421612.1|5.7e-25|photosystem I P700 chlorophyll a apoprotein A2 (plastid) [Dendrobium candidum]
		Solyc12g035580.1
	PsaA	Solyc10g017890.1	0.146667	0.203333	0.266667	0.0081789	0.996347	0.993425	0.336415	0.860366	0.68516	-0.386351	0.866491	0.621412	PHT59671.1|4.5e-115|Photosystem I chlorophyll a apoprotein A1 [Capsicum baccatum]
		Solyc02g020960.1	0.0266667	0.0266667	0	-0.0671372	0.958183	0.93137	-0.181832	0.859196	0.643499	0.145388	0.866491	0.678637	YP_008145701.1|3.0e-110|photosystem I P700 apoprotein A1 (chloroplast) [Glycine cyrtoloba]
		Solyc12g033040.1	0.186667	0.15	0.186667	-0.297263	0.85214	0.764397	-0.0494083	0.978898	0.940443	-0.137881	0.942468	0.849403	YP_009463933.1|2.2e-85|photosystem I P700 chlorophyll a apoprotein A1 (chloroplast) [Broussonetia kazinoki x Broussonetia papyrifera]
		Solyc09g015340.1	0.163333	0.163333	0.366667	-0.26814	0.866934	0.784066	0.586595	0.765109	0.46493	-0.842161	0.611636	0.283659	YP_009351971.1|2.6e-63|photosystem I P700 apoprotein A1 (chloroplast) [Schoepfia jasminodora]
		Solyc09g015300.1	0.266667	0.156667	0.18	-1.12542	0.394973	0.227793	-0.23373	0.898662	0.75413	-0.272727	0.828427	0.551602	YP_009461556.1|1.8e-56|photosystem I P700 chlorophyll a apoprotein A1 (plastid) [Ranunculus reptans]
		Solyc09g015320.1	0	0	0.106667	0	0	0	0.647207	0.647094	0.328954	-0.706234	0.610831	0.282841	YP_009504289.1|7.5e-43|photosystem I P700 apoprotein A1 (plastid) [Styrax zhejiangensis]
		Solyc01g017330.1	0	0.0566667	0	0	0	0	0	0	0	0	0	0	PHT98332.1|5.9e-51|Photosystem I chlorophyll a apoprotein A1 [Capsicum chinense]
		Solyc01g017300.1	0.0833333	0.03	0.14	-0.678511	0.67189	0.489708	0.203741	0.921171	0.804009	-0.688419	0.687444	0.36056	AHI87527.1|6.5e-49|photosystem I P700 chlorophyll A apoprotein A1 (chloroplast) [Chionographis japonica]
		Solyc10g052740.1	0.43	0	0	-2.09732	0.0995183	0.0398832	-1.54071	0.219782	0.0579692	0	0	0	ESQ45951.1|4.3e-46|hypothetical protein EUTSA_v10011033mg [Eutrema salsugineum]
		Solyc10g017900.1	0.4	0.69	0.266667	0.238183	0.876595	0.797855	-0.425756	0.859196	0.60894	0.586047	0.780201	0.471292	ESQ45951.1|1.4e-52|hypothetical protein EUTSA_v10011033mg [Eutrema salsugineum]
		Solyc09g018800.1
		Solyc12g032960.1	0.16	0.48	0.316667	0.402023	0.80458	0.678481	0.174779	0.921171	0.803755	0.154933	0.938466	0.841676	AKT94706.1|1.8e-34|photosystem I P700 chlorophyll a apoprotein A1 (chloroplast) [Brunonia australis]
		Solyc01g017310.1	0.203333	0.2	0.21	-0.0871273	0.947692	0.910145	-0.0308132	0.981146	0.955099	-0.0260877	0.987034	0.959699	YP_009428275.1|3.1e-30|photosystem I P700 chlorophyll a apoprotein A1 (chloroplast) [Prunus humilis]
		Solyc12g033070.1	0.65	0.43	0.536667	-0.860918	0.438357	0.262231	-0.485048	0.780938	0.482025	-0.306987	0.866491	0.666139	YP_009132008.1|3.4e-66|NADH dehydrogenase subunit 5 (chloroplast) [Solanum habrochaites]
		Solyc01g017320.1	1.2	0.236667	1.90333	-1.0418	0.481079	0.298699	0.190658	0.928289	0.817663	-0.990246	0.515249	0.203211	CAC87909.1|2.4e-29|photosystem1 subunit A, partial (chloroplast) [Enkianthus chinensis]
		Solyc06g009940.1	0.43	0.21	0.603333	-0.468982	0.770248	0.623174	0.127027	0.953075	0.873663	-0.456848	0.815502	0.522793	YP_009342932.1|1.4e-27|photosystem I P700 chlorophyll a apoprotein A1 (chloroplast) [Carpinus putoensis]
		Solyc00g245200.1
		Solyc09g015290.1
		Solyc10g047400.1	0.273333	0.0933333	0.55	-0.677488	0.672336	0.490332	0.37419	0.860078	0.653245	-1.00931	0.519471	0.206773	YP_008563145.1|4.6e-41|NADH-plastoquinone oxidoreductase subunit 7 (chloroplast) [Solanum lycopersicum]
	PsaC	Solyc02g011760.1
	PsaD	Solyc06g054260.1	6242.36	2647.21	4558.06	-1.65053	2.12945e-11	1.06395e-12	-0.673905	0.00874078	0.000864673	-0.954643	0.0128626	0.000711663	NP_001295880.1|6.0e-116|photosystem I reaction center subunit II, chloroplastic [Solanum lycopersicum]
	PsaP	Solyc10g005050.2	931.937	356.137	837.377	-1.77388	2.18073e-07	1.94212e-08	-0.373637	0.397698	0.139894	-1.35147	0.00873806	0.000418344	XP_004248418.1|4.1e-93|protein CURVATURE THYLAKOID 1B, chloroplastic [Solanum lycopersicum]
	PsaE1	Solyc06g083680.2	1247.8	546.87	842.367	-1.61309	3.56122e-11	1.81975e-12	-0.789775	0.00108067	7.16134e-05	-0.80874	0.0270206	0.00206493	XP_004242379.1|1.3e-70|photosystem I reaction center subunit IV A, chloroplastic [Solanum lycopersicum]
	PsaE2	Solyc09g063130.2	3332.38	1651.61	3068.91	-1.42293	2.9073e-07	2.64579e-08	-0.342725	0.377658	0.128544	-1.04958	0.0177512	0.00112399	XP_004247116.1|3.4e-72|photosystem I reaction center subunit IV B, chloroplastic [Solanum lycopersicum]
	PsaG	Solyc07g066150.1	3037.27	1193.42	2179.3	-1.73493	7.5527e-08	6.3128e-09	-0.68729	0.0134209	0.00146921	-1.01955	0.044989	0.00432864	XP_004244001.1|8.6e-77|photosystem I reaction center subunit V, chloroplastic [Solanum lycopersicum]
	PsaO	Solyc06g074200.2	2521.71	717.873	1349.1	-2.18567	9.39938e-11	5.00502e-12	-1.07245	0.0259065	0.003359	-1.01671	0.132223	0.0224443	XP_004241330.1|1.8e-78|photosystem I subunit O [Solanum lycopersicum]
	FDC1	Solyc03g005190.2	54.1667	46.5033	87.41	-0.644672	0.0617212	0.0223316	0.430895	0.580188	0.266397	-1.04353	0.0788748	0.0102637	XP_004234013.1|3.6e-78|ferredoxin C 1, chloroplastic [Solanum lycopersicum]
