# Supplementary material for: Potential Role of Domains Rearranged Methyltransferase7 in Starch and Chlorophyll Metabolism to Regulate Leaf Senescence in Tomato
Source: Front Plant Sci. 2022 Feb 8;13:836015. doi: 10.3389/fpls.2022.836015 (PMC8860812; doi:10.3389/fpls.2022.836015)
Supplement: Supplementary file 8 [file Table_7.XLSX]

## Sheet: Sheet1
Supplementary Table S7. Transcriptome data of genes associated with the chlorophyll biosynthesis and degradation.
		GENE ID	WT FPKM	drm7i-1 FPKM	drm7i_ns-1 FPKM	log2(drm7i-1/WT)	Qvalue(drm7i-1/WT)	Pvalue(drm7i-1/WT)	log2(drm7i_ns-1/WT)	Qvalue(drm7i_ns-1/WT)	Pvalue(drm7i_ns-1/WT)	log2(drm7i-1/drm7i_ns-1)	Qvalue(drm7i-1/drm7i_ns-1)	Pvalue(drm7i-1/drm7i_ns-1)
chlorophyll biosynthesis	HEMA1	Solyc04g076870.2	384.167	97.0067	123.017	-2.37445	8.30702e-16	2.45255e-17	-1.83614	8.18965e-12	1.17878e-13	-0.521466	0.34825	0.102937	XP_004238036.1|1.3e-303|glutamyl-tRNA reductase 1, chloroplastic [Solanum lycopersicum]
	HEMA2	Solyc01g106390.2	33.89	10.6467	24.66	-2.0875	3.49604e-15	1.10022e-16	-0.611495	0.551353	0.24307	-1.25809	0.105843	0.0161815	XP_004230651.1|6.1e-309|glutamyl-tRNA reductase 1, chloroplastic-like [Solanum lycopersicum]
	GSA1	Solyc04g009200.2	118.773	98.3133	226.2	-0.706173	0.00910108	0.00237216	0.633177	0.458787	0.177921	-1.28359	0.0593249	0.00662275	XP_015073176.1|1.6e-275|glutamate-1-semialdehyde 2,1-aminomutase, chloroplastic [Solanum pennellii]
	HEMB1	Solyc08g069030.2	122.973	127.913	164.713	-0.384887	0.0235236	0.00713462	0.181768	0.754717	0.452034	-0.558262	0.162923	0.0307549	XP_004245301.1|1.8e-247|delta-aminolevulinic acid dehydratase, chloroplastic [Solanum lycopersicum]
	HEMC	Solyc07g066470.2	159.42	113.487	247.673	-0.917262	0.00562642	0.0013661	0.35169	0.804292	0.510227	-1.19068	0.125089	0.0206157	XP_004243981.1|1.3e-201|porphobilinogen deaminase, chloroplastic [Solanum lycopersicum]
	UROS	Solyc04g079320.2	78.2133	84.27	85.4933	-0.332485	0.0766885	0.0289767	-0.106402	0.654032	0.336188	-0.222409	0.511473	0.200913	XP_010320354.1|5.5e-169|uroporphyrinogen-III synthase, chloroplastic [Solanum lycopersicum]
	HEME1	Solyc10g007320.2	37.9233	42.09	116.663	-0.28675	0.546817	0.361248	1.20119	0.147162	0.0324908	-1.45667	0.0704951	0.00869995	XP_010327114.1|4.1e-244|uroporphyrinogen decarboxylase 1, chloroplastic isoform X1 [Solanum lycopersicum]
	HEME2	Solyc06g048730.2	132.12	81.69	140.57	-1.11446	0.000401558	7.00747e-05	-0.140331	0.873503	0.708374	-0.941453	0.0657675	0.00783428	XP_004240850.1|3.0e-220|uroporphyrinogen decarboxylase, chloroplastic [Solanum lycopersicum]
	HEMF1	Solyc10g005110.2	227.46	145.88	235.263	-1.0739	6.08738e-06	7.09758e-07	-0.180573	0.836876	0.566822	-0.869183	0.0395405	0.00358515	XP_004248412.1|6.0e-239|coproporphyrinogen-III oxidase 1, chloroplastic [Solanum lycopersicum]
	PPOX2	Solyc03g005080.2	15.5167	29.4833	29.17	0.473942	0.00853474	0.00220266	0.651503	0.067193	0.0113329	-0.183966	0.75429	0.439822	NP_001335305.1|2.7e-290|protoporphyrinogen oxidase-like protein [Solanum lycopersicum]
	PPOX1	Solyc01g079090.2	89.6767	76.5633	127.813	-0.661002	0.00704214	0.00176239	0.268592	0.635821	0.316628	-0.911233	0.0326551	0.00271673	NP_001335308.1|0.0e+00|protoporphyrinogen oxidase [Solanum lycopersicum]
	CHLH	Solyc04g015750.2	689.103	83.3633	145.313	-3.43387	3.92209e-42	2.35408e-44	-2.33949	3.53156e-08	8.12436e-10	-0.9376	0.1297	0.0217189	XP_016571958.1|0.0e+00|PREDICTED: magnesium-chelatase subunit ChlH, chloroplastic [Capsicum annuum]
	CHLI	Solyc10g008740.2	344.237	242.17	396.843	-0.932427	0.00110661	0.000218783	-0.0291786	0.974732	0.927191	-0.873372	0.0925025	0.0131602	XP_004248139.1|4.1e-238|magnesium-chelatase subunit ChlI, chloroplastic [Solanum lycopersicum]
	CHLD	Solyc04g015490.2	77.9333	50.9733	129.143	-1.03251	0.000839466	0.000160553	0.463237	0.539161	0.233807	-1.44328	0.00834683	0.000397146	XP_004236627.1|0.0e+00|magnesium-chelatase subunit ChlD, chloroplastic [Solanum lycopersicum]
	CHLM	Solyc03g118240.2	201.653	125.473	215.14	-1.10185	0.000375132	6.4946e-05	-0.138555	0.859196	0.638021	-0.940922	0.036847	0.00324483	XP_004235845.1|6.2e-184|magnesium protoporphyrin IX methyltransferase, chloroplastic [Solanum lycopersicum]
	LCAA/YCF54	Solyc06g007760.2	133.77	142.677	311.43	-0.336616	0.416616	0.245512	0.880006	0.219538	0.057828	-1.19661	0.0722509	0.00902953	XP_004240451.1|4.8e-122|uncharacterized protein LOC101255002 [Solanum lycopersicum]
	CHL27	Solyc10g077040.1	1833.65	458.25	585.683	-2.39918	2.46663e-19	5.31179e-21	-1.8363	2.09205e-11	3.1926e-13	-0.535053	0.286857	0.0742434	NP_001332768.1|2.1e-234|putative magnesium-protoporphyrin monomethyl ester cyclase [Solanum lycopersicum]
	PORA	Solyc12g013710.1	796.02	309.727	688.547	-1.7459	1.13827e-06	1.14344e-07	-0.413124	0.618022	0.300901	-1.24022	0.0516891	0.00532553	XP_004251852.1|1.1e-224|protochlorophyllide reductase [Solanum lycopersicum]
	PORB	Solyc10g006900.2	283.823	190.54	316.597	-0.97661	0.025382	0.00780873	-0.0681845	0.955399	0.879269	-0.844991	0.287102	0.0743928	NP_001304903.1|3.4e-223|protochlorophyllide oxidoreductase [Solanum lycopersicum]
	PORC	Solyc07g054210.2	372.42	215.217	342.743	-1.20927	3.0503e-05	4.09585e-06	-0.348585	0.421157	0.153382	-0.84454	0.0298094	0.0023893	NP_001296970.1|9.8e-227|protochlorophyllide reductase [Solanum lycopersicum]
	DVR	Solyc01g067290.2	93.62	42.21	90.3367	-1.5412	9.77939e-05	1.46813e-05	-0.264501	0.840466	0.577805	-1.19709	0.0646753	0.00762105	XP_010321210.1|1.9e-238|divinyl chlorophyllide a 8-vinyl-reductase, chloroplastic [Solanum lycopersicum]
	CHLG	Solyc09g014760.2	82.0133	95.5867	136.367	-0.219588	0.393326	0.22621	0.475613	0.43764	0.163294	-0.685473	0.22955	0.0521335	XP_004246318.1|2.0e-194|chlorophyll synthase, chloroplastic [Solanum lycopersicum]
		Solyc03g115980.1	2207.24	482.457	1063.52	-2.58452	6.16603e-21	1.17279e-22	-1.23866	0.00114687	7.65692e-05	-1.26731	0.0108191	0.000559539	XP_004235993.1|8.9e-269|geranylgeranyl diphosphate reductase, chloroplastic [Solanum lycopersicum]
		Solyc01g088310.2	11.8567	9.84	17.8267	-0.704294	0.00219167	0.000472945	0.332369	0.748949	0.44416	-0.985297	0.157607	0.0291906	XP_004229690.1|1.0e-260|geranylgeranyl diphosphate reductase, chloroplastic-like [Solanum lycopersicum]
	CAO	Solyc11g012850.1	180.677	48.4533	32.9167	-2.33	2.63094e-31	2.74212e-33	-2.56446	6.38728e-11	1.02674e-12	0.33711	0.636906	0.306711	XP_004250311.1|0.0e+00|chlorophyllide a oxygenase, chloroplastic-like [Solanum lycopersicum]
	CAO-1	Solyc06g060310.2	192.193	24.47	30.6267	-3.37109	3.03317e-48	1.2424e-50	-2.68157	1.188e-08	2.5576e-10	-0.483861	0.599815	0.270066	XP_004242029.1|0.0e+00|chlorophyllide a oxygenase, chloroplastic [Solanum lycopersicum]
chlorophyll degradation	NYC1	Solyc07g024000.2	7.52	72.3467	111.093	2.79502	7.75367e-52	2.86148e-54	3.60473	1.10252e-85	6.32959e-89	-0.811385	0.00406024	0.000151355	XP_004242955.1|3.7e-276|probable chlorophyll(ide) b reductase NYC1, chloroplastic isoform X2 [Solanum lycopersicum]
	NOL	Solyc05g032660.2	64.77	38.95	72.0233	-1.15677	1.56833e-05	1.98696e-06	-0.0776393	0.927782	0.816803	-1.03214	0.0571326	0.00623586	XP_010321272.1|4.0e-194|chlorophyll(ide) b reductase NOL, chloroplastic isoform X4 [Solanum lycopersicum]
	HCAR	Solyc09g091100.2	35.2767	25.0367	36.05	-0.929743	1.80829e-06	1.89097e-07	-0.203113	0.521253	0.220527	-0.716821	0.0160053	0.000978765	NP_001309778.1|4.5e-270|coenzyme F420 hydrogenase_dehydrogenase beta subunit-like [Solanum lycopersicum]
	CLH1	Solyc06g053980.2	6.09333	115.47	120.93	3.77687	2.29648e-132	1.1176e-135	4.03417	4.08473e-125	8.37515e-129	-0.273361	0.26704	0.0658582	XP_004241041.1|1.4e-180|chlorophyllase-2, chloroplastic [Solanum lycopersicum]
	CLH1-2	Solyc09g082600.1
	CLH1-3	Solyc09g065620.2	8.64667	21.7267	12.2567	0.825575	0.0491411	0.0170513	0.228497	0.859196	0.623244	0.541172	0.611469	0.283424	XP_004247197.1|4.9e-175|chlorophyllase-2, chloroplastic isoform X1 [Solanum lycopersicum]
	CLH1-4	Solyc12g005300.1	75.9767	16.08	63.5367	-2.52551	2.50756e-06	2.69488e-07	-0.416437	0.7733	0.473607	-1.76523	0.0602456	0.00678627	XP_004251483.1|2.7e-182|chlorophyllase-2, chloroplastic isoform X1 [Solanum lycopersicum]
	CLH1-5	Solyc01g066470.2	2.41333	1.66667	4.51667	-0.862324	0.339578	0.187113	0.572598	0.669116	0.351268	-1.26052	0.276144	0.0698061	XP_025886275.1|3.4e-111|uncharacterized protein LOC101259283 [Solanum lycopersicum]
	SGRL	Solyc04g063240.2	210.62	56.1633	103.207	-2.32378	4.79583e-30	5.36803e-32	-1.23765	4.90598e-07	1.35394e-08	-1.05447	0.00353874	0.000128183	XP_004237702.1|9.4e-138|protein STAY-GREEN LIKE, chloroplastic [Solanum lycopersicum]
	SGR1	Solyc08g080090.2	11.4967	57.7567	9.57333	1.77096	0.000202594	3.25689e-05	-0.486004	0.260547	0.0739994	2.17841	4.6316e-05	5.14768e-07	NP_001234723.1|7.4e-158|senescence-inducible chloroplast stay-green protein 1 [Solanum lycopersicum]
	MES12	Solyc06g064870.2	10.2767	14.02	11.8167	-0.00169562	0.995142	0.991292	-0.0319513	0.966015	0.901723	0.0342083	0.960799	0.889168	NP_001309122.1|1.4e-198|putative methylesterase 12, chloroplastic [Solanum lycopersicum]
	MES11-1	Solyc02g089060.2	3.65	9.75	6.12	0.941098	0.00865167	0.00223713	0.486955	0.459417	0.178484	0.434608	0.448591	0.1588	XP_004232153.1|7.4e-216|putative methylesterase 11, chloroplastic [Solanum lycopersicum]
	MES11-2	Solyc05g012180.2	2.95667	3.11	1.53333	-0.347146	0.733136	0.558777	-0.958656	0.383681	0.131958	0.689994	0.511203	0.200765	XP_004239042.1|1.1e-241|putative methylesterase 11, chloroplastic [Solanum lycopersicum]
	MES	Solyc03g044790.2	6.63667	72.47	9.93	2.81863	4.28525e-08	3.4462e-09	0.263519	0.867862	0.698982	2.1626	0.0129792	0.000722906	NP_001233813.1|2.6e-150|methylesterase [Solanum lycopersicum]
	MES17	Solyc06g048570.2	12.5533	6.03333	3.28333	-1.47956	2.22354e-08	1.70702e-09	-2.1146	1.00418e-12	1.32183e-14	0.655308	0.157729	0.0292386	XP_004240843.1|6.7e-159|methylesterase 17 [Solanum lycopersicum]
	TIC55	Solyc12g096550.1	177.203	73.1767	59.97	-1.71994	4.88596e-71	9.90745e-74	-1.75694	7.23876e-10	1.29423e-11	0.0830473	0.88944	0.737658	XP_004253047.1|0.0e+00|protein TIC 55, chloroplastic [Solanum lycopersicum]
	TIC55-IV	Solyc04g040160.2	66.56	21.9233	25.08	-2.02531	9.79309e-19	2.26379e-20	-1.618	1.24738e-12	1.67777e-14	-0.390749	0.455669	0.163522	XP_004237332.1|0.0e+00|protochlorophyllide-dependent translocon component 52, chloroplastic [Solanum lycopersicum]
	PAO	Solyc11g066440.1	100.15	95.01	76.37	-0.525786	0.000948308	0.000184447	-0.617767	0.060462	0.00987783	0.106817	0.866491	0.649511	NP_001234535.2|0.0e+00|lethal leaf spot 1-like protein [Solanum lycopersicum]
	RCCR	Solyc03g044470.2	45.0333	47.7033	63.26	-0.364283	0.0334996	0.010855	0.252198	0.41061	0.146945	-0.614868	0.000380501	7.03608e-06	XP_004234668.1|4.7e-175|red chlorophyll catabolite reductase, chloroplastic [Solanum lycopersicum]
	ELT6	Solyc02g094430.2	10.8267	18.8	14.3	0.3491	0.016762	0.00480196	0.16301	0.581179	0.267229	0.187826	0.438515	0.152263	XP_009800266.1|0.0e+00|PREDICTED: acyltransferase-like protein At3g26840, chloroplastic [Nicotiana sylvestris]
	ELT6-1	Solyc01g098110.2	4.94333	8.57667	13.1733	0.0732423	0.803717	0.667504	0.565128	0.0113076	0.00118706	-0.487323	0.0735032	0.0092924	XP_025888230.1|0.0e+00|acyltransferase-like protein At1g54570, chloroplastic isoform X2 [Solanum lycopersicum]
	CLD1	Solyc02g070490.2	51.76	15.0367	15.8567	-2.22336	1.77514e-82	2.80763e-85	-1.91105	1.79184e-19	1.28587e-21	-0.282369	0.491762	0.187565	XP_004233123.1|8.4e-222|pheophytinase, chloroplastic [Solanum lycopersicum]
	CLD1-2	Solyc02g062610.2	49.3367	14.11	24.1	-2.22953	3.81142e-27	5.02357e-29	-1.21118	0.00479695	0.000410139	-0.933445	0.0811218	0.0107282	XP_004233528.1|5.6e-216|pheophytinase, chloroplastic [Solanum lycopersicum]
	PPH	Solyc01g088090.2	53	84.0333	49.0867	0.199999	0.639009	0.455428	-0.338752	0.44623	0.170104	0.535636	0.291605	0.0762693	XP_004229681.1|2.4e-304|pheophytinase, chloroplastic [Solanum lycopersicum]
