# Supplementary material for: Potential Role of Domains Rearranged Methyltransferase7 in Starch and Chlorophyll Metabolism to Regulate Leaf Senescence in Tomato
Source: Front Plant Sci. 2022 Feb 8;13:836015. doi: 10.3389/fpls.2022.836015 (PMC8860812; doi:10.3389/fpls.2022.836015)
Supplement: Supplementary file 9 [file Table_8.XLSX]

## Sheet: Sheet1
Supplementary Table S8. Transcriptome data of genes associated with the starch matabolism and sucrose transporter.
		GENE ID	WT FPKM	drm7i-1 FPKM	drm7i_ns-1 FPKM	log2(drm7i-1/WT)	Qvalue(drm7i-1/WT)	Pvalue(drm7i-1/WT)	log2(drm7i_ns-1/WT)	Qvalue(drm7i_ns-1/WT)	Pvalue(drm7i_ns-1/WT)	log2(drm7i-1/drm7i_ns-1)	Qvalue(drm7i-1/drm7i_ns-1)	Pvalue(drm7i-1/drm7i_ns-1)
starch biosynthesis	PGI1	Solyc04g076090.2	35.7767	34.0467	32.6	-0.518308	0.00161428	0.000334076	-0.368565	0.135003	0.0289014	-0.145222	0.584475	0.257174	NP_001234583.2|0.0e+00|glucose-6-phosphate isomerase 1 [Solanum lycopersicum]
	PGM1	Solyc03g006870.2	40.6433	42.64	75.8167	-0.362083	0.387801	0.22222	0.64532	0.0970009	0.0186078	-0.981427	0.0567524	0.00617095	XP_004234144.1|0.0e+00|phosphoglucomutase, chloroplastic [Solanum lycopersicum]
	APS1	Solyc07g056140.2	223.637	161.873	207.463	-0.895876	0.00270648	0.000598087	-0.341188	0.119802	0.0247503	-0.545185	0.260677	0.0634313	NP_001234696.2|7.8e-300|glucose-1-phosphate adenylyltransferase small subunit, chloroplastic [Solanum lycopersicum]
	APL1	Solyc01g079790.2	135.777	55.71	100.17	-1.70163	1.85324e-11	9.16171e-13	-0.651497	0.0978718	0.0188351	-1.00925	0.0312659	0.00256283	PHT59893.1|2.4e-280|Glucose-1-phosphate adenylyltransferase large subunit 1, chloroplastic [Capsicum baccatum]
	APL2	Solyc07g019440.2	25.6967	44.8467	37.7667	0.354301	0.000907259	0.000175396	0.311291	0.412484	0.148346	0.0435488	0.932857	0.829431	XP_011074558.1|4.1e-238|glucose-1-phosphate adenylyltransferase large subunit 2, chloroplastic/amyloplastic-like [Sesamum indicum]
	APL3	Solyc01g109790.2	19.64	23.32	18.5067	-0.205956	0.424783	0.251859	-0.314666	0.690693	0.375731	0.12564	0.879246	0.719621	XP_015062533.1|2.4e-302|glucose-1-phosphate adenylyltransferase large subunit 1 [Solanum pennellii]
	GBSS	Solyc08g083320.2	219.653	68.2867	62.6867	-2.11218	1.27107e-27	1.6186e-29	-1.99098	4.45634e-12	6.32286e-14	-0.0789413	0.909029	0.780559	XP_011081361.1|8.5e-290|granule-bound starch synthase 1, chloroplastic/amyloplastic [Sesamum indicum]
	SS1	Solyc03g083090.2	31.57	78.1333	82.0533	0.855125	2.44555e-05	3.21736e-06	1.13066	6.78604e-09	1.39416e-10	-0.272797	0.541244	0.222487	XP_015070049.1|0.0e+00|soluble starch synthase 1, chloroplastic/amyloplastic [Solanum pennellii]
	SS2	Solyc02g088000.2	39.01	33.9233	36.24	-0.6441	0.000641406	0.000118511	-0.334363	0.373133	0.126051	-0.302078	0.533271	0.216678	XP_004232219.1|0.0e+00|granule-bound starch synthase 2, chloroplastic/amyloplastic [Solanum lycopersicum]
	SS3	Solyc02g080570.2	58.0833	31.5	44.3133	-1.30861	1.9916e-07	1.76077e-08	-0.62394	0.00159685	0.000112891	-0.675726	0.0594367	0.00665176	XP_015065647.1|0.0e+00|soluble starch synthase 3, chloroplastic/amyloplastic isoform X1 [Solanum pennellii]
	SS4	Solyc02g071040.2	1731.69	298.487	608.97	-2.87169	2.88651e-14	9.97365e-16	-1.55026	0.0213534	0.00261729	-1.05308	0.258717	0.0626031	XP_016556252.1|0.0e+00|PREDICTED: probable starch synthase 4, chloroplastic/amyloplastic [Capsicum annuum]
	BE1	Solyc07g064830.2	2.35667	4.41	8.94667	0.44675	0.124661	0.052381	1.56997	0.00219763	0.000162393	-1.15486	0.0395453	0.00358993	XP_004244099.1|0.0e+00|1,4-alpha-glucan-branching enzyme 3, chloroplastic/amyloplastic [Solanum lycopersicum]
	BE2	Solyc04g082400.2	17.6033	28.6133	24.1967	0.25149	0.0465763	0.0160235	0.209315	0.813293	0.524982	0.040885	0.965195	0.898638	XP_019069273.2|0.0e+00|1,4-alpha-glucan-branching enzyme isoform X2 [Solanum lycopersicum]
	BE3	Solyc09g009190.2	36.1733	70.2167	92.2133	0.498313	0.163225	0.0732124	1.09068	2.67053e-05	1.09839e-06	-0.581648	0.173857	0.0341678	NP_001275467.1|0.0e+00|1,4-alpha-glucan-branching enzyme 2-2, chloroplastic/amyloplastic-like [Solanum tuberosum]
	ISA1	Solyc07g014590.2	4.27	19.0667	24.21	1.68028	2.94337e-08	2.30499e-09	2.18644	9.48357e-12	1.37668e-13	-0.526162	0.205703	0.0443064	XP_015082414.1|0.0e+00|isoamylase 1, chloroplastic isoform X1 [Solanum pennellii]
	ISA2	Solyc09g064800.1	5.10333	6.27667	9.09667	-0.147765	0.676345	0.495317	0.585062	0.0621264	0.0102386	-0.732149	0.0140544	0.000811234	XP_004247144.2|0.0e+00|isoamylase 2, chloroplastic isoform X1 [Solanum lycopersicum]
starch degradation	GWD	Solyc05g005020.2	69.2833	92.5867	81.9333	-0.0280678	0.920145	0.861559	0.00207303	0.99705	0.993452	-0.0230132	0.978749	0.929083	NP_001234405.2|0.0e+00|glucan water dikinase [Solanum lycopersicum]
	PWD	Solyc09g098040.2	61.93	84.4133	123.79	0.00418354	0.988875	0.981776	0.754907	1.43071e-05	5.57946e-07	-0.74376	0.00289533	9.78303e-05	XP_004248008.1|0.0e+00|phosphoglucan, water dikinase, chloroplastic [Solanum lycopersicum]
	SEX4	Solyc03g111160.2	5.23333	14.5667	10.04	1.01927	7.85917e-08	6.57534e-09	0.644246	0.378375	0.129032	0.32401	0.738216	0.420567	XP_004236343.1|1.3e-218|phosphoglucan phosphatase DSP4, amyloplastic-like [Solanum lycopersicum]
	SEX4-2	Solyc11g007830.1	22.43	83.6133	101.85	1.44729	2.89346e-20	5.72638e-22	1.92563	2.15334e-24	1.1391e-26	-0.481966	0.0975079	0.0142348	NP_001233952.1|1.2e-215|protein tyrosine phosphatase [Solanum lycopersicum]
	LSF2	Solyc06g050230.2	30.3933	46.0033	33.1067	0.12877	0.614232	0.430242	-0.143583	0.818036	0.53904	0.276247	0.552305	0.231095	XP_004240876.1|3.2e-118|phosphoglucan phosphatase LSF2, chloroplastic [Solanum lycopersicum]
	LSF1	Solyc12g062250.1	18.9733	33.5833	66.3967	0.373738	0.291741	0.153032	1.53518	5.13018e-09	1.04556e-10	-1.15374	0.000727816	1.65326e-05	XP_004252666.1|0.0e+00|phosphoglucan phosphatase LSF1, chloroplastic isoform X2 [Solanum lycopersicum]
	BAM1	Solyc09g091030.2	141.687	82.67	64.5267	-1.22256	2.44498e-06	2.62068e-07	-1.33718	1.97339e-06	6.21467e-08	0.126691	0.866491	0.687774	NP_001234556.2|0.0e+00|beta-amylase [Solanum lycopersicum]
	BAM2	Solyc08g005780.2	6.47	7.25	8.55	-0.27976	0.268727	0.137088	0.161495	0.660913	0.343874	-0.434101	0.167472	0.0322064	XP_004244442.1|0.0e+00|beta-amylase 8 isoform X2 [Solanum lycopersicum]
	BAM3	Solyc08g007130.2	29.7933	4.23333	20.2967	-3.0579	1.48383e-08	1.11326e-09	-0.62876	0.665655	0.347877	-1.83169	0.0791041	0.0103279	XP_004244551.1|0.0e+00|beta-amylase 3, chloroplastic-like [Solanum lycopersicum]
	BAM	Solyc08g077530.2	76.1767	79.89	147.747	-0.368529	0.346243	0.191812	0.713578	1.84252e-05	7.30632e-07	-1.04684	0.0146184	0.000861167	XP_004245844.1|0.0e+00|beta-amylase 3, chloroplastic [Solanum lycopersicum]
	BAM5	Solyc07g052690.2.1
	BAM7	Solyc01g094580.2	6.67333	13.99	11.5567	0.614065	0.000430408	7.56329e-05	0.543529	0.0584869	0.00947361	0.0655861	0.904964	0.769794	XP_004229887.1|0.0e+00|beta-amylase 7 isoform X3 [Solanum lycopersicum]
	BAM9	Solyc01g067660.2	207.04	66.8433	35.6133	-2.05976	2.38791e-14	8.15403e-16	-2.64744	1.28312e-11	1.90999e-13	0.654886	0.350611	0.104033	NP_001234052.1|0.0e+00|1,4-alpha-glucan-maltohydrolase [Solanum lycopersicum]
	AMY1	Solyc03g095710.2	7.25	15.87	8.78333	0.6702	0.0190714	0.00558732	0.039194	0.966326	0.90229	0.629396	0.0942838	0.0135461	XP_004235226.1|8.0e-276|alpha-amylase [Solanum lycopersicum]
	AMY2	Solyc04g082090.2	3.87333	11.2333	6.78333	1.23956	3.84481e-10	2.26092e-11	0.744604	0.0376933	0.00540009	0.481245	0.175166	0.0346808	XP_004238402.1|3.2e-250|probable alpha-amylase 2 [Solanum lycopersicum]
	AMY3	Solyc05g007070.2	23.2133	114.723	128.207	1.85345	2.58532e-44	1.35253e-46	2.20577	2.01523e-39	4.95833e-42	-0.357864	0.147498	0.0265636	XP_004238770.1|0.0e+00|alpha-amylase 3, chloroplastic [Solanum lycopersicum]
	ISA3	Solyc06g009220.2	28.9833	24.9467	35.0233	-0.659898	0.000101741	1.53531e-05	0.0349463	0.944178	0.851078	-0.689519	0.00249534	7.96591e-05	XP_004240554.1|0.0e+00|isoamylase 3, chloroplastic [Solanum lycopersicum]
	LDA	Solyc11g008050.1	2.21333	2.90667	5.86667	-0.0501598	0.932024	0.880959	1.11312	0.00667932	0.000616274	-1.14506	0.0261763	0.00196856	XP_019066689.2|5.7e-260|pullulanase 1, chloroplastic isoform X2 [Solanum lycopersicum]
	PHS1	Solyc03g065340.2	18.4667	28.7967	35.27	0.192489	0.529965	0.345748	0.685039	0.00364716	0.000295081	-0.489798	0.0733878	0.00926688	XP_004234848.1|0.0e+00|alpha-1,4 glucan phosphorylase L-1 isozyme, chloroplastic/amyloplastic isoform X1 [Solanum lycopersicum]
	PHS2	Solyc09g031970.2	49.1667	97.2033	170.42	0.531903	0.0992142	0.0397412	1.53637	2.75765e-14	3.15502e-16	-0.977775	0.0186302	0.00121365	XP_006366595.1|0.0e+00|PREDICTED: alpha-glucan phosphorylase, H isozyme isoform X1 [Solanum tuberosum]
	DPE1	Solyc04g053120.2	20.8933	17.34	34.7233	-0.710963	0.00430897	0.0010111	0.480498	0.359334	0.119046	-1.17458	0.00311714	0.000108181	XP_004237445.1|0.0e+00|4-alpha-glucanotransferase, chloroplastic/amyloplastic [Solanum lycopersicum]
	DPE2	Solyc02g020980.2	52.4133	55.5267	77.5833	-0.358899	0.101115	0.0406706	0.323546	0.343042	0.110723	-0.67386	0.0495792	0.00497139	XP_025884949.1|0.0e+00|4-alpha-glucanotransferase DPE2 isoform X1 [Solanum lycopersicum]
sucrose transporter	MEX1	Solyc04g064720.2	60.65	80.9467	78.5833	-0.0287926	0.922421	0.865447	0.131242	0.800653	0.505916	-0.157172	0.785418	0.479979	XP_004237731.1|2.0e-236|maltose excess protein 1-like, chloroplastic [Solanum lycopersicum]
	GLT1	Solyc02g086160.2	70.68	47.7667	54.4333	-1.01084	3.51251e-20	6.99425e-22	-0.604808	0.00804901	0.000780608	-0.394699	0.128927	0.0214905	NP_001287654.1|9.7e-302|plastidic glucose transporter 4-like [Solanum lycopersicum]
	GPT1	Solyc07g064270.2	29.47	51.75	33.7067	0.35854	0.0139033	0.00386516	-0.0429141	0.908605	0.77749	0.402937	0.0771374	0.00992495	XP_004244144.1|3.0e-222|glucose-6-phosphate/phosphate translocator 1, chloroplastic [Solanum lycopersicum]
	GTP2	Solyc05g045670.2	9.05667	3.45333	0.473333	-1.68743	0.0169699	0.00487252	-3.93781	3.75613e-11	5.89928e-13	2.14293	0.0137938	0.000788388	XP_004240145.1|2.9e-230|glucose-6-phosphate/phosphate translocator 2, chloroplastic [Solanum lycopersicum]
	PPT2	Solyc02g086650.2	34.3867	3.566	16.79	-3.66365	9.86541e-45	5.04113e-47	-1.05691	0.277077	0.0810006	-2.04847	0.0146736	0.000865431	XP_004243190.1|1.9e-186|probable sugar phosphate/phosphate translocator At3g14410 isoform X1 [Solanum lycopersicum]
	TPT	Solyc10g008980.2	893.087	597.633	788.797	-1.00897	7.99136e-06	9.55411e-07	-0.412327	0.0212298	0.00259597	-0.589534	0.0814153	0.0108023	NP_001294940.1|8.8e-234|triose phosphate/phosphate translocator [Solanum lycopersicum]
