# Supplementary material for: Potential Role of Domains Rearranged Methyltransferase7 in Starch and Chlorophyll Metabolism to Regulate Leaf Senescence in Tomato
Source: Front Plant Sci. 2022 Feb 8;13:836015. doi: 10.3389/fpls.2022.836015 (PMC8860812; doi:10.3389/fpls.2022.836015)
Supplement: Supplementary file 10 [file Table_9.XLSX]

## Sheet: Sheet1
Supplementary Table S9. Transcriptome data of genes associated with the Calvin–Benson cycle.
	GENE ID	WT FPKM	drm7i-1 FPKM	drm7i_ns-1 FPKM	log2(drm7i-1/WT)	Qvalue(drm7i-1/WT)	Pvalue(drm7i-1/WT)	log2(drm7i_ns-1/WT)	Qvalue(drm7i_ns-1/WT)	Pvalue(drm7i_ns-1/WT)	log2(drm7i-1/drm7i_ns-1)	Qvalue(drm7i-1/drm7i_ns-1)	Pvalue(drm7i-1/drm7i_ns-1)
Ribulose bisphosphate carboxylase	Solyc03g034220.2	8883.17	3281.02	7851.08	-1.82952	1.68336e-08	1.26979e-09	-0.374872	0.72238	0.408379	-1.32485	0.0571326	0.00623149	NP_001295873.1|6.8e-101|ribulose bisphosphate carboxylase small chain 2A, chloroplastic [Solanum lycopersicum]
	Solyc02g085950.2	31712.6	8363.08	23410.8	-2.26237	4.88114e-08	3.95512e-09	-0.62748	0.324416	0.10201	-1.51018	0.0305517	0.00247606	NP_001296139.1|2.6e-101|ribulose bisphosphate carboxylase small chain 3B, chloroplastic [Solanum lycopersicum]
	Solyc02g063150.2	6993.8	2475.79	6079.94	-1.87037	3.10639e-06	3.40017e-07	-0.38506	0.77105	0.471116	-1.30299	0.117285	0.0189037	NP_001295872.1|5.7e-101|ribulose bisphosphate carboxylase small chain 1, chloroplastic [Solanum lycopersicum]
	Solyc01g007330.2	22.61	14.75	23.3367	-1.00724	0.0196298	0.00578514	-0.17731	0.807768	0.515612	-0.806338	0.189741	0.0391135	YP_009256042.1|1.1e-285|ribulose-1,5-bisphosphate carboxylase/oxygenase large subunit (chloroplast) [Scopolia parviflora]
Phosphoglycerate kinase	Solyc07g066610.2	739.433	344.997	774.277	-1.51439	2.3854e-07	2.13891e-08	-0.161448	0.859196	0.635225	-1.2978	0.0106494	0.00054515	XP_004243968.1|1.8e-267|phosphoglycerate kinase, chloroplastic [Solanum lycopersicum]
	SOLYC07G066600.2	342.07	358.077	261.257	-0.38162	0.000503849	9.00913e-05	-0.627195	3.58596e-05	1.53079e-06	0.250755	0.0670122	0.00806495	NP_001316520.1|3.1e-221|phosphoglycerate kinase [Solanum lycopersicum]
GLYCERALDEHYDE 3-PHOSPHATE DEHYDROGENASE	Solyc02g020940.2	361.57	183.42	356.357	-1.40031	5.1736e-08	4.22356e-09	-0.243562	0.806847	0.514615	-1.08866	0.0613893	0.00698197	XP_004231523.1|6.2e-231|glyceraldehyde-3-phosphate dehydrogenase A, chloroplastic-like [Solanum lycopersicum]
	Solyc04g009030.2	3878.39	1069.52	2684	-2.24199	1.43098e-12	6.07024e-14	-0.733772	0.106503	0.0210902	-1.43222	0.00777477	0.000360022	XP_004236849.1|1.0e-225|glyceraldehyde-3-phosphate dehydrogenase A, chloroplastic [Solanum lycopersicum]
	Solyc12g094640.1	680.293	114.623	520.96	-2.85638	1.23506e-09	7.89383e-11	-0.57314	0.500153	0.20622	-2.05297	0.00583423	0.000246013	XP_004253122.1|8.1e-259|glyceraldehyde-3-phosphate dehydrogenase B, chloroplastic-like [Solanum lycopersicum]
	Solyc04g082630.2	594.317	249.107	351.723	-1.67754	9.05145e-11	4.80106e-12	-0.952286	0.0375711	0.00537852	-0.676927	0.188534	0.0387346	XP_004238446.3|3.1e-274|glyceraldehyde-3-phosphate dehydrogenase B, chloroplastic [Solanum lycopersicum]
CYTOSOLIC TRIOSE PHOSPHATE ISOMERASE	Solyc06g005490.2	13.4833	20.87	17.5	0.191302	0.696753	0.520142	0.140718	0.859196	0.609195	0.0523476	0.938615	0.841948	XP_004240361.1|1.0e-141|triosephosphate isomerase, cytosolic [Solanum lycopersicum]
	Solyc04g011510.2	491.607	326.177	339.183	-1.03649	1.2001e-18	2.81799e-20	-0.754156	0.0135031	0.00148286	-0.264512	0.587209	0.259694	XP_004236746.1|1.1e-130|triosephosphate isomerase, cytosolic [Solanum lycopersicum]
PLASTID ISOFORM TRIOSE PHOSPHATE ISOMERASE	Solyc01g111120.2	130.99	103.687	158.217	-0.770101	0.00195682	0.000416235	0.0339399	0.974251	0.925584	-0.772724	0.184	0.0373255	XP_004230885.1|1.7e-182|triosephosphate isomerase, chloroplastic [Solanum lycopersicum]
	Solyc10g054870.1	90.3267	6.30333	66.9033	-3.96001	1.11599e-12	4.65712e-14	-0.57654	0.628595	0.310173	-2.87146	0.000518509	1.02848e-05	XP_004248665.1|4.1e-177|triosephosphate isomerase, chloroplastic [Solanum lycopersicum]
Fructose-bisphosphate aldolase	Solyc05g008600.2	53.2767	106.847	63.95	0.546895	0.00252798	0.000554438	0.0236806	0.973837	0.92441	0.51953	0.188217	0.0385969	XP_004238877.1|1.3e-223|fructose-bisphosphate aldolase 3, chloroplastic [Solanum lycopersicum]
	Solyc02g062340.2	927.573	177.477	515.813	-2.77914	3.03214e-22	5.25072e-24	-1.0047	0.100875	0.0195967	-1.59833	0.0103554	0.000525056	NP_001333905.1|2.1e-223|fructose-bisphosphate aldolase [Solanum lycopersicum]
	Solyc02g084440.2	4496.7	2235.61	1709.37	-1.43379	4.03164e-11	2.07648e-12	-1.58233	2.26466e-06	7.24364e-08	0.18593	0.83651	0.563738	NP_001294934.1|3.1e-221|fructose-bisphosphate aldolase [Solanum lycopersicum]
	Solyc01g110360.2	1770.07	289.203	707.373	-2.98842	2.12782e-23	3.46037e-25	-1.33602	0.111236	0.0223385	-1.24775	0.19033	0.0393044	NP_001333903.1|1.6e-224|fructose-bisphosphate aldolase 1 [Solanum lycopersicum]
	Solyc10g083570.1	31.92	54.4867	51.2967	0.304186	0.0468145	0.0161149	0.413299	0.645038	0.326354	-0.133251	0.898144	0.754629	NP_001333917.1|8.5e-203|fructose-bisphosphate aldolase [Solanum lycopersicum]
	Solyc09g009260.2	28.0433	125.133	30.0667	1.67471	2.0611e-09	1.34074e-10	-0.128714	0.858805	0.604591	1.80407	1.25656e-13	1.47813e-16	NP_001308301.1|2.2e-203|fructose-1,6-bisphosphate aldolase [Solanum lycopersicum]
	Solyc07g065900.2	266.353	50.5467	359.99	-2.68323	2.21903e-08	1.70176e-09	0.186465	0.859196	0.637053	-2.64571	6.98248e-05	8.6102e-07	NP_001296956.1|2.1e-200|fructose-bisphosphate aldolase [Solanum lycopersicum]
	Solyc01g098580.2	5.99333	4.22667	5.58333	-0.94432	0.000252939	4.17907e-05	-0.320556	0.609494	0.293704	-0.600653	0.245754	0.0576911	XP_004230163.2|5.9e-195|phosphoglycerate mutase-like protein AT74H [Solanum lycopersicum]
	Solyc10g045430.1	3.09667	6.24667	6.26333	0.558941	0.115693	0.0479466	0.760619	0.0294751	0.00396329	-0.203015	0.753749	0.439076	XP_004248821.1|1.6e-192|phosphoglycerate mutase-like protein AT74H [Solanum lycopersicum]
phosphoric ester hydrolase	Solyc01g106010.2	27.59	33.09	44.44	-0.133686	0.677133	0.496247	0.458318	0.0121929	0.00130599	-0.581771	0.0682947	0.00833842	XP_004230574.1|6.3e-236|uncharacterized protein LOC101253137 [Solanum lycopersicum]
fructose 1,6-bisphosphatase	Solyc09g011810.2	410.67	138.717	250.283	-1.98108	2.23285e-16	6.31154e-18	-0.925875	0.00235225	0.000175845	-1.02289	0.0117868	0.000632351	XP_004246365.1|3.5e-231|fructose-1,6-bisphosphatase 1, chloroplastic [Solanum lycopersicum]
	Solyc10g086730.1	205.083	96.2267	124.077	-1.51379	4.79192e-11	2.47972e-12	-0.916899	0.0491125	0.00760876	-0.542932	0.419752	0.141217	NP_001315602.1|7.9e-237|fructose-1,6-bisphosphatase, chloroplastic [Solanum lycopersicum]
	Solyc10g086720.1	4.86667	0.323333	0.81	-4.38121	1.48842e-30	1.61168e-32	-2.63496	1.7215e-09	3.23834e-11	-1.49172	0.0651956	0.00771674	XP_006349477.1|4.4e-152|PREDICTED: fructose-1,6-bisphosphatase, chloroplastic-like [Solanum tuberosum]
	Solyc04g071340.2	135.557	32.8833	67.2867	-2.4266	1.60975e-15	4.85706e-17	-1.23596	1.06546e-12	1.41405e-14	-1.17451	0.00756125	0.000347192	XP_004237787.1|3.1e-207|fructose-1,6-bisphosphatase, cytosolic [Solanum lycopersicum]
	Solyc12g056530.1	50.6	65.94	52.71	-0.0660108	0.714831	0.539356	-0.175337	0.49181	0.200103	0.113375	0.728734	0.40939	XP_004252579.1|5.6e-196|fructose-1,6-bisphosphatase, cytosolic [Solanum lycopersicum]
transketolase 1	Solyc10g018300.1	581.65	271.583	601.757	-1.51352	2.03485e-07	1.80312e-08	-0.180564	0.859196	0.625139	-1.26655	0.0202129	0.00137414	XP_019230189.1|0.0e+00|PREDICTED: transketolase, chloroplastic [Nicotiana attenuata]
transketolase 2	Solyc05g050970.2	28.39	38.68	25.98	0.00514455	0.985024	0.976195	-0.362584	0.11442	0.0232303	0.368891	0.26539	0.0652559	XP_006345515.1|0.0e+00|PREDICTED: transketolase, chloroplastic-like [Solanum tuberosum]
ribulose-phosphate 3-epimerase	Solyc05g007260.2	20.5467	30.6567	21.6567	0.124584	0.59039	0.401933	-0.156197	0.712498	0.397036	0.279448	0.476093	0.176529	XP_004238785.1|5.9e-125|ribulose-phosphate 3-epimerase, cytoplasmic isoform [Solanum lycopersicum]
	Solyc03g115820.2	508.907	228.303	453.91	-1.57521	9.61676e-12	4.54747e-13	-0.388907	0.307994	0.0944088	-1.15445	0.00381757	0.000140116	NP_001333814.1|7.7e-154|ribulose-phosphate 3-epimerase, chloroplastic [Solanum lycopersicum]
CP12 subunit	Solyc06g009630.1	523.903	1267.07	1533.21	0.830926	2.00949e-10	1.12625e-11	1.31586	1.22625e-18	9.70501e-21	-0.485411	0.0281939	0.00220263	XP_010321871.1|9.2e-67|calvin cycle protein CP12-1, chloroplastic [Solanum lycopersicum]
	Solyc01g079470.2	60.9267	2386.43	2708.27	4.73807	1.56291e-54	5.38761e-57	5.04234	1.87125e-55	2.60898e-58	-0.38276	0.233856	0.0538894	XP_004229393.1|5.8e-67|calvin cycle protein CP12-1, chloroplastic [Solanum lycopersicum]
phosphoribulokinase	Solyc08g076220.2	2341.79	718.507	1575.85	-2.10536	1.58777e-14	5.30589e-16	-0.790505	0.00485428	0.000416118	-1.28045	0.00235674	7.40873e-05	XP_004245935.1|6.1e-232|phosphoribulokinase, chloroplastic [Solanum lycopersicum]
sedoheptulose-bisphosphatase	Solyc05g052600.2	737.77	359.72	660.313	-1.45716	5.28822e-09	3.6523e-10	-0.384664	0.441071	0.166075	-1.03669	0.0201212	0.00136138	NP_001234585.1|5.0e-223|chloroplast sedoheptulose-1,7-bisphosphatase [Solanum lycopersicum]
ribose-5-phosphate isomerase	Solyc01g097800.2	18.62	29.9767	21.64	0.241247	0.192853	0.0900134	-0.0205089	0.971849	0.919004	0.264884	0.44472	0.156544	XP_004230119.1|5.4e-180|DNA damage-repair/toleration protein DRT102 [Solanum lycopersicum]
	Solyc02g069620.2	28.7167	22.35	42.2767	-0.784136	0.0204993	0.00608378	0.306792	0.658134	0.340807	-1.05671	0.0468582	0.00458832	XP_004233185.1|9.8e-163|probable ribose-5-phosphate isomerase 4, chloroplastic [Solanum lycopersicum]
	Solyc01g097460.2	145.643	89.8967	204.13	-1.1293	6.76486e-07	6.53221e-08	0.231568	0.855051	0.597757	-1.28588	0.038588	0.00346702	XP_004230104.1|1.9e-158|probable ribose-5-phosphate isomerase 3, chloroplastic [Solanum lycopersicum]
	Solyc05g008370.1	65.1433	79.4567	75.0133	-0.173894	0.735899	0.561668	-0.0318731	0.972699	0.921683	-0.139212	0.866491	0.681003	XP_004238861.1|3.2e-146|probable ribose-5-phosphate isomerase 2 [Solanum lycopersicum]
